# Supplementary material for: Differences in research funding for women scientists: a systematic comparison of UK investments in global infectious disease research during 1997–2010
Source: PubMed Central journal article supplement — BMJ Open. 2013 Dec 2;3(12):e003362. doi: 10.1136/bmjopen-2013-003362 (PMC3865386; doi:10.1136/bmjopen-2013-003362), 2013-12-02
Supplement: bmjopen-2013-003362.draft_revisions.pdf [file bmjopen-2013-003362.draft_revisions.pdf]

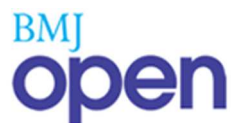

**Inequalities in research funding for women scientists:  
systematic analysis of UK investments in global infectious  
disease research 1997–2010**

|                                    |                                                                                                                                                                                                                                                                             |
|------------------------------------|-----------------------------------------------------------------------------------------------------------------------------------------------------------------------------------------------------------------------------------------------------------------------------|
| Journal:                           | <i>BMJ Open</i>                                                                                                                                                                                                                                                             |
| Manuscript ID:                     | bmjopen-2013-003362                                                                                                                                                                                                                                                         |
| Article Type:                      | Research                                                                                                                                                                                                                                                                    |
| Date Submitted by the Author:      | 07-Jun-2013                                                                                                                                                                                                                                                                 |
| Complete List of Authors:          | Head, Michael; University College London, Infection & Population Health<br>Fitchett, Joseph; London School of Hygiene & Tropical Medicine,<br>Cooke, Mary; University College London,<br>Wurie, Fatima; University College London,<br>Atun, Rifat; Imperial College London, |
| <b>Primary Subject<br>Heading</b>: | Infectious diseases                                                                                                                                                                                                                                                         |
| Secondary Subject Heading:         | Global health                                                                                                                                                                                                                                                               |
| Keywords:                          | INFECTIOUS DISEASES, PUBLIC HEALTH, STATISTICS & RESEARCH<br>METHODS, VIROLOGY, PARASITOLOGY, MYCOLOGY                                                                                                                                                                      |
|                                    |                                                                                                                                                                                                                                                                             |

SCHOLARONE™  
Manuscripts

**Inequalities in research funding for women scientists: systematic analysis of UK investments in global infectious disease research 1997–2010**

Michael G Head<sup>a</sup>, Joseph R Fitchett<sup>b</sup>, Mary K Cooke<sup>a</sup>, Fatima B Wurie<sup>a</sup>, Rifat Atun<sup>c\*</sup>

<sup>a</sup> University College London, Research Department of Infection and Population Health, UCL Royal Free Campus, Rowland Hill Street, London, NW3 2PF

<sup>b</sup> London School of Hygiene & Tropical Medicine, Keppel Street, London, WC1E 7HT

<sup>c</sup> Imperial College Business School and the Faculty of Medicine, Imperial College London, South Kensington Campus, London SW7 2AZ

\*Corresponding Author

Number of Words: **3 758**

**Keywords** – gender, funding, research, women, inequality

## Abstract

**Objectives:** Women are under-represented in biomedical science. Funding awarded to UK institutions for all infectious disease research from 1997 to 2010 was investigated, across disease categories and along the research and development continuum.

**Design:** Systematic analysis

**Methods:** Data was obtained from several sources for infectious disease research for the period 1997-2010 and each study assigned to - disease categories; type of science (pre-clinical, phases I, II or III, product development, implementation research); categories of funding organisation. Fold differences and statistical analysis were used to compare total investment, study numbers, mean grant, and median grant between men and women according to disease system, specific infection and funding organisation.

**Results:** 325,922 studies were screened and 6052 studies included in the final analysis, comprising 4357 grants (72.0%) awarded to men and 1695 grants (28.0%) awarded to women, totalling £2.274 billion. Of this, men received £1.786 billion (78.5%) and women £488 million (21.5%). The median value of award was greater for men (£179 389; IQR £59146–£371 977) than women (£125 556; IQR £30 982–£261 834).

Awards were greater for male PIs across all infectious disease systems, excepting neurological infections and sexually transmitted infections. The proportion of total funding awarded to women ranged from 14.3% in 1998 to 26.8% in 2009 (mean 21.4%); and was lowest for pre-clinical research at 18.2% (£285.5 million of £1.573 billion) and highest for operational research at 30.9% (£151.4 million of £489.7 million).

**Conclusions:** There are clear and consistent disparities in funding received by men and women principal investigators. Women have fewer funded studies and receive less funding in absolute and in relative terms. The median funding awarded are lower for women across

most infectious disease areas, by funder, and type of science funded along the R&D pipeline. The disparities remain broadly unchanged over the 14-year study period.

**Article summary**

Article focus

- Our aim was to investigate the distribution of funding across infectious disease research by gender of principal investigator, and to identify any disparities between genders.

Key messages

- There are clear and consistent disparities in funding received by men and women principal investigators.
- Total funding and the median award is typically greater in male PIs than female PIs
- Worryingly, these disparities remain consistent over the time period of our analysis (1997-2010)

Strengths and limitations of this study

- This is the first study to present data to such a great level of detail and quantifying the results with statistical analysis adds rigour.
- Our results add further evidence to previous work highlighting inequalities around gender, and can be used to enhance the debate on furthering the numbers and career paths of women in science
- Weaknesses include being unable to assess the success and failure rates by gender and we also lacked data on the academic ranking of principal investigators and were hence unable to adjust for levels of seniority across both genders.

## Introduction

Women are under-represented in biomedical science, with a limited number of studies suggesting inequalities and discriminatory practices in the United Kingdom (UK), United States of America (US) and the European Union (EU) as a whole.

Yet, few studies have systematically explored the extent of these inequalities in relation to women in science. Women make up 50% of EU student population and 45% of doctoral students, but only one third of career researchers are women – a figure that is lower for senior positions.<sup>1</sup> In 1997 an analysis of the Swedish Medical Research Council suggested that peer-reviewers could not judge scientific merit independent of gender and noted the clear discrimination against women researchers.<sup>2</sup>

A number of UK studies have raised concerns on the position of women in biomedical science. In 2001, a Wellcome Trust survey, concluded that although women were as successful as men in securing funding for biomedical research, they were less likely to apply for grant funds because of their status in scientific institutions and the level of support they received.<sup>3</sup> An analysis of Wellcome Trust awards in 2000-08 revealed a significant gender difference in the amount of funding awarded, even after adjusting for the seniority of the principal investigator, with conclusion “the most likely explanation for the difference in amounts awarded to women and men is that women are systematically less ambitious in the amounts of funding requested in their grant applications.”<sup>4</sup> Although, in 2011, around 44% of academics in UK universities were women, only 39% of senior lecturers and 19% of professors were women.<sup>5</sup>

A number of studies from US have shown that women in science are disadvantaged compared to men.<sup>6-8</sup> In 2012, a study which asked faculty from research-intensive US

universities to rate equally qualified man and woman applicant for a laboratory manager, found that the male applicant was rated significantly more competent and employable by both male and female faculty.<sup>9</sup>

The low numbers of women in science and the reasons for this anomaly is a concern for scientists and policy makers. Although the UK Medical Research Council (MRC) has a gender equality scheme that briefly states gender equality is reflected in agreements with research organisations receiving MRC funding, it is not clear how this scheme is implemented.<sup>10</sup>

While a number of initiatives have aimed to increase the numbers of women involved in science, there are no affirmative actions or binding policies in the UK or Europe to definitively ensure women are better represented in science. Indeed, some initiatives aimed at increasing women in science have been criticised. For example, in 2012, the European Commission campaign targeting 13-18 year-old secondary school students<sup>11</sup> was widely criticised and described as an insult to women in science.<sup>12,13</sup> The offending video clip was removed from the EU campaign website. The effects of campaigns attempting to raise the profile of women in science<sup>14,15</sup> have not been assessed.

We have systematically analysed research funding awarded to UK institutions for all infectious disease research, for the 14-year period from 1997 to 2010<sup>16</sup> In this study we examine with trends over time the distribution of funding awarded to men and women principal investigators (PIs) across specific infections, in investigation categories, and along the research and development (R&D) continuum, extending from pre-clinical to clinical and operational research.

## Methods

We obtained data from several sources for infectious disease research studies where funding was awarded between 1997 and 2010. We identified 325,922 studies for screening. We assigned each study to primary disease categories. We briefly outline the methodology for the categorisation of disease areas and classification of the funding sources, elaborated in detail elsewhere.<sup>16</sup> Figure 1 shows the sources of data and the numbers of studies at each stage of screening to reach the final set of studies for detailed analysis.

*Figure 1. Methodology flow chart*

Within each category, we documented topic-specific subsections, including specific pathogen or disease. We allocated studies to one of four categories along the R&D continuum: pre-clinical; phases I, II or III; product development; and operational research, and to one of the 26 categories for funding organisations.

Where the PI was named, we assigned them to men or women categories. The studies where only an initial was available for the forename were assigned as “unclear” if we were unable to establish the PIs gender from a review of the literature and publicly available publications.

Reference to sexually transmitted infections excludes HIV. Neglected tropical diseases were categorised according to classification used by the World Health Organization (WHO) ([http://www.who.int/neglected\\_diseases/diseases/en](http://www.who.int/neglected_diseases/diseases/en)). Antimicrobial resistance includes

antibacterial, antiviral, antifungal and antiparasitic studies. No private sector funding was included in this analysis due to limited publicly available data.

We converted grants awarded in a currency other than pounds sterling to UK pounds using the mean exchange rate in the year of the award. We adjusted grant funding amounts for inflation and reported in 2010 UK pounds.

We excluded studies not immediately relevant to infection, veterinary infectious disease research studies (unless there was a zoonotic component) those exploring the use of viral vectors to investigate non-communicable diseases, grants for symposia or meetings, or studies with UK contributions (e.g. as a collaborator), but the funding was awarded to a non-UK institution. Unfunded studies were excluded.

We used Microsoft Excel versions 2000 and 2007 to categorise studies. Where needed, data were exported into Microsoft Access (versions 2000 and 2007) and specific keyword queries used to select precise sections of the data for analysis. We used Stata (version 11.0) for statistical analysis and to generate figures.

We used fold differences to compare total investment, number of studies, mean grant, and median grant between men and women according to disease system, specific infection and funding organisation.

We used nonparametric Mann-Whitney rank-sum test to assess the distribution of funding by gender. Nonparametric K-sample test on equality of medians was applied to compare the median funding by gender, and reported as a chi-squared statistic without Yates' correction

for continuity. Nonparametric Wilcoxon signed-rank test was applied when comparing matched data, such as time trends by gender. The significance for all tests was defined at the 5% level (two-sided  $P=0.05$ ).

## Results

We identified 6165 studies from the 325,922 studies screened that were suitable for inclusion in our analysis. Of these, we were unable to ascertain the gender of principal investigator for 30 studies (0.5%). We excluded 83 studies (1.3%) funded by the Bill and Melinda Gates Foundation (Gates Foundation) (38 studies; 0.6%) and the UK Department for International Development (DFID) (22 studies; 0.4%), accounting for £321.2 million (12.3% of total) that did not specify the PIs name or gender. We included 6052 studies in the final analysis, comprising 4357 grants (72.0%) awarded to men and 1695 grants (28.0%) awarded to women, totalling £2.274 billion. Of this, £1.786 billion (78.5%) were awarded to men and £488 million (21.5%) awarded to women.

The median value of grant funding was greater for men (£179 389; IQR £59146–£371 977) than for women (£125 556; IQR £30 982–£261 834). Similarly, mean value of the grant funding was greater for men (£409 910; SD £840 087) than for women (£288 011; SD £704 474). Figure 2 shows the distribution of the total investments and median funding awarded to PIs by gender over time.

*Figure 2a. Total investment over time awarded to male and female principal investigators*

*Figure 2b Median investment over time awarded to male and female principal investigators*

**Infectious disease system**

Table 1A (web appendix 1) shows the total investment, total numbers of studies, mean grant funding, median grant funding and fold differences in funding according to 9 disease systems and by gender of PI. We identified no infectious disease system where women led the majority of research efforts or were awarded the majority of funding. Median funding awards were greater for male PIs across all infectious disease systems, with the exception of neurological infections and sexually transmitted infections.

Greatest levels of funding awarded to men and to women were for research into respiratory infections and HIV. Men received a total of £312.1 million for research into respiratory infections compared with £84.4 million for women, a 3.70 fold difference, and a total of £290.8 million for HIV research compared with £79.7 million for women, a 3.65 fold difference.

The largest difference between total funding for men and for women were with gastrointestinal infections (5.65 fold difference) where women received only 15.0% of the total investment (£37.0 million) and spearheaded 18.9% (149) of the studies and neurological infections (4.22 fold difference). Smallest difference between total funding for men and for women were with research into sexually transmitted infections (1.90 fold difference) where women received 35.0% (£45.4 million) of the total funding and spearheaded 49.0% (182) of the studies.

Mean funding for grants were significantly greater for men (£409 910; SD £840 087) than for women (£288 011; SD £704 474). The differences were statistically significant ( $P > 0.01$ ) for gastrointestinal infections (men £328 021; SD £458 720) (women £248 615; SD £433 176),

for haematological infections (men £417 889; SD £914 626) (women £306 126; SD £819 910), and for HIV (men £649 216; SD £1 550 920) (women £278 505; SD £545 657).

Median funding for grants showed a similar pattern with significantly greater grant funding for men (£179 389; IQR £59 146–£371 977) than women (£125 556; IQR £30 983–£261 835). Differences were statistically significant ( $P > 0.05$ ) for gastrointestinal infections (men £208 369; IQR £78 852–£357 771) (women £155 066; IQR £43 637–£305 928), for hepatic infections (men £118 638; IQR £41 342–£269 629) (women £68 620; IQR £26 720–£221 952), and for HIV (men £163 462; IQR £39 153–£511 800) (women £114 272; IQR £29 880–£305 339).

### ***Specific Infections***

Table 1B (web appendix 1) shows total investment, total numbers of studies, mean grant funding, median grant funding and fold differences in funding according to specific infection by gender.

Men received significantly higher levels of total research funding, spearheaded greater numbers of studies, and were awarded greater median and mean funding for grants for malaria ( $P = 0.01$ ), HIV ( $P = 0.01$ ) and influenza ( $P = 0.04$ ).

Major differences between total funding for men and for women were with research into candida (47.75 fold difference), rotavirus (33.65 fold difference), campylobacter (24.33 fold difference) and norovirus (23.33 fold difference). Smallest differences between total funding for men and women were for research into dengue (1.07 fold difference) and leishmaniasis (1.55 fold difference). Women received greater total funding than men for research into leprosy (0.09 fold difference), diphtheria (0.18 fold difference), chlamydia (0.36 fold difference), syphilis (0.37 fold difference), and varicella zoster (0.54 fold difference).

Differences in mean grant funding was statistically significant ( $P > 0.05$ ) for malaria research (men £590 422; SD £1 324 909) (women £318 054; SD £726 872), for influenza (men £616 643; SD £881 493) (women £387 186; SD £489 997), for respiratory syncytial virus (men £485 283; SD £539 396) (women £187 931; SD £268 412), and for HIV (men £649 216; SD £1 550 920) (women £278 505; SD £545 657).

Differences in median grant funding were statistically significant ( $P > 0.05$ ) for malaria research (men £209 646; IQR £63 826–£529 610) (women £143 358; IQR £42 754–£314 524), for hepatitis C (men £124 797; IQR £42 475–£289 293) (women £67 265; IQR £29 880–£233 467), for influenza (men £348 730; IQR £213 601–£668 561) (women £200 787; IQR £124 210–£398 191), for herpes simplex virus (men £119 295; IQR £40 009–£446 395) (women £309 610; IQR £147 885–£439 305), and for HIV (men £163 462; IQR £39 153–£511 800) (women £114 272; IQR £29 880–£305 339).

Figure 3 shows the proportion of total funding awarded to principal investigators by gender over time and a breakdown of investment by research pipeline. The proportion of the total funding awarded to women ranged from a low of 14.3% in 1998 to a high of 26.8% in 2009, with a mean of 21.4% for the period studied. The proportion of funding was lowest for pre-clinical research at 18.2% (£285.5 million of £1.573 billion total) and highest for operational research at 30.9% (£151.4 million of £489.7 million). The funding for clinical (Phase I, II and III) research was 29.9% (£25.5 of £85.2) and for product development amounted to 20.4% (£25.8 million of £126.6 million).

*Figure 3a. Proportion of investment over time awarded to male and female principal investigators*

Figure 3b. Total investment by research pipeline awarded to male and female principal investigators

### **Funding organisation**

Table 2 (web appendix 2) shows in detail the total investment, total numbers of studies, mean grant funding, median grant funding and fold differences in funding according to funding organisation and by gender.

Public funding organisations invested a total of £1·025 billion in research led by men (78·6%) and £279·8 in research led by women (21·4%). Greatest levels of funding awarded to men and to women were by the Wellcome Trust and the UK MRC. Major differences between funding awarded to men and to women PIs were by the BBSRC, with a 6·12 fold difference. Smallest differences between funding awarded to men and to women were by the UK Government funding streams such as the National Institute for Health Research, with a 1·66 fold difference. Mean grant funding from public funding organisations were significantly greater for men at £595 361 (SD £1 080 718) than for women at £448 414 (SD £814 979). Differences were also statistically significant ( $P > 0.01$ ) for UK MRC grants with men at £751 413 (SD £1 020 748) and women at £544 427 (SD £884 442), and for UK Government grants with men at £208 828 (SD £492 519) and women at £182 907 (SD £619 889).

Median grant funding from public funding organisations had a similar pattern with significantly greater grant funding for men at £272 452 (IQR £138 322–£572 529) and women at £213 718 (IQR £92 880–£402 917). Differences were also statistically significant ( $P > 0.05$ ) for UK MRC grants with men at £404 615 (IQR £ 210 068–£811 860) and women at £286 679 (£178 182–£468 998), and for UK Government grants with men at £129 660 (IQR £23 761–£207 320) and women at £59 976 (IQR £12 564–£157 053).

Philanthropic funding organisations invested a total of £691·7 million in research led by men (78·8%) and £185·9 million in research led by women (21·2%).

Mean grant funding from philanthropic funding organisations were significantly greater for men at £338 396 (SD £695 025) than for women at £242 014 (SD £711 420). Differences were also statistically significant ( $P > 0.01$ ) for Wellcome Trust grants with men receiving £393 652 (SD £723 549) and women £230 168 (SD £362 836), and for other charitable funding organisations with men receiving £211 190 (SD £454 108) and women £271 842 (SD £1 208 852).

Median grants from philanthropic funding organisations showed a similar pattern with significantly greater grant funding for men at £153 653 (IQR £58 589 – £302 774) and women at £114 173 (IQR £42 658 – £222 842). Differences were also statistically significant ( $P > 0.05$ ) for Wellcome Trust grants with men receiving £191 461 (IQR £74 759 – £362 424) and women £137 241 (IQR £54 019 – £250 723), and for other charitable funding organisations with men receiving £91 991 (IQR £36 429 – £172 497) and women £76 058 (IQR £17 279 – £150 727).

Figure 4 shows the association between funding organisation and total investment and median funding by gender. The MRC awarded the highest median amount in grants to women (£286 679; IQR £178 182–£468 998), but the median funding amount in grants for men were 1·41 fold higher than that awarded to women (£404 615; IQR £210 068–£811 860). European Commission awarded the highest mean grants to women at £923 364 (SD £1 316 016) however mean funding amount in grants for men were 1·44 fold higher at £1325 149 (SD £2 409 860) than that for women.

Figure 4a. Association between funding organisation and total investment by gender

Figure 4b. Association between funding organisation and median award by gender

#### Time trend

Table 3 (web appendix 3) shows in detail the trends in funding over time from 1997 to 2010 by gender of principal investigators, with amounts and relative proportions each year of funding. Mean annual funding received was greater by men at £127.6 million (SD £48.7 million) than women at £34.9 million (SD £13.4 million). Proportions of annual funding received by men ranged from 73.2% to 85.7%, with a mean of 78.6%.

Proportions of annual funding received by women ranged from 14.3% to 26.8% with a mean of 21.4%. The largest annual funding received by men was £245.7 million in 2000, and the smallest at £64.2 million in 1997. The largest annual funding received by women was £59.6 million in 2002, with the smallest at £13.1 million in 1998.

Over the 14-year study period, the proportion of investment awarded to women each year remains relatively unchanged with a mean of 21.4% of total (range 14.3%–26.8%; £13.1 million to £59.6 million)). Figure 5 shows the funding trends over time and fold differences in total investments by gender. Absolute difference in the funding amounts in the grants awarded to men and women ranges between £47.9 million and £190.1 million, with a mean difference of £92.7 million (SD £38.3 million). Fold difference in grant funding for men and women ranged from 2.74 to 5.97, with a mean fold difference of 3.66.

Figure 5a. Total investment and trend over time, by gender

Figure 5b. Fold difference of investment over time, by gender

**Discussion**

We present the first, detailed and systematic analysis of the investments in infectious disease research by gender for the 14-year period 1997-2010. We identified 6165 studies funded by public and philanthropic funding organisations, with total research investment of £2·6 billion.

We quantify the differences in research funding awarded by gender, to show these to be substantial. The analysis shows clear and consistent disparities between men and women principal investigators, with lower funding in terms of the total investment, the number of funded studies, the median funding awarded and the mean funding awarded across most of the infectious disease areas funded. The analysis reveals consistent disparities, with women receiving less funding in absolute amounts and in relative terms, by funder and the type of science funded along the R&D pipeline. Analysis of the funding trends by year reveals that the disparities persist over time.

We show large disparities in median funding amounts for men and women researchers in investments by the European Commission and the MRC. Such differences were much less apparent when comparing funding from the Department of Health and BBSRC, although the BBSRC awarded 86% of funding to men. The BBSRC almost entirely funds pre-clinical research,<sup>16</sup> and this matches the increased proportions of pre-clinical studies being led by male principal investigators.

Our findings, the most detailed to date, provide new evidence to show that women in science working in the area of infectious disease research are clearly disadvantaged. Our findings confirm the concerns raised in the published literature on the subject.<sup>4,9,15,17</sup> Disparities that

are more marked at senior levels of academia need to be investigated to explain and account for the observed differences.

The precise reasons why the median awards across most infectious disease conditions should be significantly less for women principal investigators cannot be deduced from the available data. The next step may be to investigate success rates by gender to assess how many women are applying. Some studies have suggested that women were systematically less ambitious in the amounts of funding requested in their grant applications when compared with men who are equivalently ranked academically, and that relatively simple mentoring programmes could at least partially overcome this anomaly.<sup>4</sup> However, there is no evidence supporting the assertions. Others have suggested that systems which ensure PI anonymity during review of grant funding submissions may help reduce subtle gender biases<sup>9</sup>, though in practice this approach would be challenging as the experience of the PI is a key factor when considering suitability of request for research support. However, evidence on effective interventions to address barriers for women scientists are lacking.<sup>17</sup> Women of child-bearing age are being disadvantaged in some areas of employment, even though in relation to scientific endeavour productivity as measured by published outputs is not significantly different between women with and without children.<sup>18</sup>

### *Study limitations*

Our analysis has several limitations. We rely on the accuracy of the original data from the funding organisations and as described elsewhere we have excluded data from industry as the publicly available data are incomplete.<sup>16</sup>

In the period analysed, we were not able to find data on the number of men and women PIs requesting financial support for research agencies from the funding sources studies. Hence,

we were unable to assess the success and failure rates by gender. We also did not have complete data on gender of co-applicants for each study or on the proportion of awards made to clinical and non-clinical researchers. The proportion of doctors registered in the UK favours men (56.8%as of January 2013) over women,<sup>19</sup> but the proportion of those carrying out research appears to be unknown. Understanding the distribution of researchers is critical to understanding the research landscape.

We lacked data on the academic ranking of principal investigators and were hence unable to adjust for levels of seniority across both genders. We were unable to get data on gender from the Gates Foundation and DFID and hence were unable to clarify the gender of a small proportion of investigators, though we believe these limitations are not likely to change the conclusions of the study.

Notwithstanding these limitations, our study provides a systematic analysis of the unequal distribution of investments in infectious disease research by gender. We demonstrate that in the UK there are clear and unacceptable disparities in the number of women at the level of principal investigator in infectious disease research.

Although earlier studies have discussed possible solutions, including mentoring programmes and advertising campaigns, none have systematically explored the reasons why such inequalities persist. Hence, without an understanding of the reasons for the observed inequalities, the proposed solutions are not very meaningful. Research is needed to elucidate an understanding of the factors that can explain the observed disparities.

There is no evidence that women and men researchers are not equally able, hence, other factors are likely to be at play to explain the unacceptable disparities in research funding between men and women, which have persisted over the 14-year study period. We strongly urge policy makers, funders and scientists to urgently investigate the factors leading to the observed disparities and develop policies developed to address them, in order to ensure that, as in all walks of life, women are appropriately supported and equally valued in scientific endeavour.

### **Funding**

This research received no specific grant from any funding agency in the public, commercial or not-for-profit sectors

### **Author contribution**

MGH designed the study with input from RA and JF and collated the dataset. JRF, FW and MKC checked and refined the dataset. JRF undertook data analysis and created the graphs and figures with input from MGH and RA. MGH, JRF, and RA interpreted the data and wrote the first draft. MGH, JRF, and RA refined the analysis and paper with input from MKC and FBW. All authors reviewed and approved the final version. RA is guarantor of the paper.

### **Competing interests**

RA has received research funding from the UK Medical Research Council, the UK National Institute for Health Research, UK CRC, UK EPSRC, the UK Department for International Development and the UK Department of Health. RA is a member of the UL Medical Research Council Global Health Group. MGH works for the Infectious Disease Research Network, which has supported this work and is funded by the UK Department of Health. JRF has received funds from the Wellcome Trust and is a steering group member for the Infectious Disease Research Network. MKC has received funding from the Medical

1  
2  
3  
4  
5  
6  
7  
8  
9  
10  
11  
12  
13  
14  
15  
16  
17  
18  
19  
20  
21  
22  
23  
24  
25  
26  
27  
28  
29  
30  
31  
32  
33  
34  
35  
36  
37  
38  
39  
40  
41  
42  
43  
44  
45  
46  
47  
48  
49  
50  
51  
52  
53  
54  
55  
56  
57  
58  
59  
60

Research Council and the Bill & Melinda Gates Foundation. FBW has received funds from UCLH Charitable Foundation.

**Acknowledgements**

We thank Jennifer Harris and Raidah Haider for their input and assistance, and acknowledge the assistance of the research and development funding agencies for provision of data.

**Data-sharing statement**

All gender data is available with this submission. Further data relating to the Research Investments project can be found at [www.researchinvestments.org](http://www.researchinvestments.org) or by contacting the corresponding author.

## References

- 1 More women in senior positions. Key to economic stability and growth. European Commission, Luxembourg, 2010.
- 2 Wenneras C, Wold A. Nepotism and sexism in peer-review. *Nature* 1997; **387**: 341–3.
- 3 Blake M, La Valle I. Who applies for research funding? Key factors shaping funding application behaviour among women and men in British higher education institutions. London, 2000.
- 4 Bedi G, Van Dam NT, Munafo M. Gender inequality in awarded research grants. *Lancet* 2012; **380**: 474.
- 5 Fitzpatrick S. A Survey of Staffing Levels of Medical Clinical Academics in UK Medical Schools as at 31 July 2011. London, 2012  
[http://www.medschools.ac.uk/Publications/Documents/MS\\_Clinical\\_Academic\\_Staff\\_Survey\\_310711.pdf](http://www.medschools.ac.uk/Publications/Documents/MS_Clinical_Academic_Staff_Survey_310711.pdf).
- 6 Burrelli J. Thirty-Three Years of Women in S&E Faculty Positions - US National Science Foundation. Arlington, 2008 <http://www.nsf.gov/statistics/infbrief/nsf08308/>.
- 7 Lincoln AE, Pincus SH, Leboy PS. Scholars' awards go mainly to men. *Nature* 2011; **469**: 472.
- 8 Pohlhaus JR, Jiang H, Sutton J. Sex differences in career development awardees' subsequent grant attainment. *Annals of internal medicine* 2010; **152**: 616–7; author reply 617.
- 9 Moss-Racusin CA, Dovidio JF, Brescoll VL, Graham MJ, Handelsman J. Science faculty's subtle gender biases favor male students. *Proceedings of the National Academy of Sciences of the United States of America* 2012; **109**: 16474–9.

1  
2  
3 10 Medical Research Council. MRC Gender Equality Scheme.  
4  
5 2007.<http://www.mrc.ac.uk/Utilities/Documentrecord/index.htm?d=MRC003655>  
6  
7 (accessed 21 Dec 2012).  
8  
9  
10 11 European Commission. About this site- Science: It's a girl thing! 2012.[http://science-](http://science-girl-thing.eu/en/about-this-site)  
11  
12 [girl-thing.eu/en/about-this-site](http://science-girl-thing.eu/en/about-this-site) (accessed 29 Nov 2012).  
13  
14  
15 12 Gill M. "Science, it's a girl thing!" says EU Commission, holding lipstick and bunsen  
16  
17 burner. New Statesman. 2012.[http://www.newstatesman.com/blogs/martha-](http://www.newstatesman.com/blogs/martha-gill/2012/06/science-its-girl-thing-says-eu-commission-holding-lipstick-and-bunsen-burn)  
18  
19 [gill/2012/06/science-its-girl-thing-says-eu-commission-holding-lipstick-and-bunsen-](http://www.newstatesman.com/blogs/martha-gill/2012/06/science-its-girl-thing-says-eu-commission-holding-lipstick-and-bunsen-burn)  
20  
21 [burn](http://www.newstatesman.com/blogs/martha-gill/2012/06/science-its-girl-thing-says-eu-commission-holding-lipstick-and-bunsen-burn) (accessed 29 Nov 2012).  
22  
23  
24 13 Swain F. Science: It's a girl thing. Excuse me while I die inside. – SciencePunk.  
25  
26 ScienceBlogs. 2012.[http://scienceblogs.com/sciencepunk/2012/06/22/science-its-a-](http://scienceblogs.com/sciencepunk/2012/06/22/science-its-a-girl-thing-excuse-me-while-i-die-inside/)  
27  
28 [girl-thing-excuse-me-while-i-die-inside/](http://scienceblogs.com/sciencepunk/2012/06/22/science-its-a-girl-thing-excuse-me-while-i-die-inside/) (accessed 29 Nov 2012).  
29  
30  
31 14 Yong E. Edit-a-thon gets women scientists into Wikipedia. Nature.  
32  
33 2012.[http://www.nature.com/news/edit-a-thon-gets-women-scientists-into-wikipedia-](http://www.nature.com/news/edit-a-thon-gets-women-scientists-into-wikipedia-1.11636)  
34  
35 [1.11636](http://www.nature.com/news/edit-a-thon-gets-women-scientists-into-wikipedia-1.11636) (accessed 29 Nov 2012).  
36  
37  
38 15 Donald A. Throw off the cloak of invisibility. *Nature* 2012; **490**: 447.  
39  
40  
41  
42 16 Head MG, Fitchett JR, Cooke MK, Wurie FB, Hayward AC, Atun R. UK investments in  
43  
44 global infectious disease research 1997-2010: a case study. *The Lancet infectious*  
45  
46 *diseases* 2012.[http://www.thelancet.com/journals/a/article/PIIS1473-3099\(12\)70261-](http://www.thelancet.com/journals/a/article/PIIS1473-3099(12)70261-X/fulltext)  
47  
48 [X/fulltext](http://www.thelancet.com/journals/a/article/PIIS1473-3099(12)70261-X/fulltext) (accessed 17 Nov 2012).  
49  
50  
51 17 Ceci SJ, Williams WM. Understanding current causes of women's  
52  
53 underrepresentation in science. *Proceedings of the National Academy of Sciences of*  
54  
55 *the United States of America* 2011; **108**: 3157–62.  
56  
57  
58  
59  
60

- 1  
2  
3 18 Fox MF. Gender, Family Characteristics, and Publication Productivity among  
4  
5 Scientists. *Social Studies of Science* 2005; **35**: 131–50.  
6  
7  
8 19 List of Registered Medical Practitioners - statistics. General Medical Council.  
9  
10 [http://www.gmc-uk.org/doctors/register/search\\_stats.asp](http://www.gmc-uk.org/doctors/register/search_stats.asp) (accessed 26 Jan 2013).  
11  
12  
13  
14  
15  
16  
17  
18  
19  
20  
21  
22  
23  
24  
25  
26  
27  
28  
29  
30  
31  
32  
33  
34  
35  
36  
37  
38  
39  
40  
41  
42  
43  
44  
45  
46  
47  
48  
49  
50  
51  
52  
53  
54  
55  
56  
57  
58  
59  
60

1  
2  
3  
4  
5  
6  
7  
8  
9  
10  
11  
12  
13  
14  
15  
16  
17  
18  
19  
20  
21  
22  
23  
24  
25  
26  
27  
28  
29  
30  
31  
32  
33  
34  
35  
36  
37  
38  
39  
40  
41  
42  
43  
44  
45  
46  
47  
48  
49  
50  
51  
52  
53  
54  
55  
56  
57  
58  
59  
60

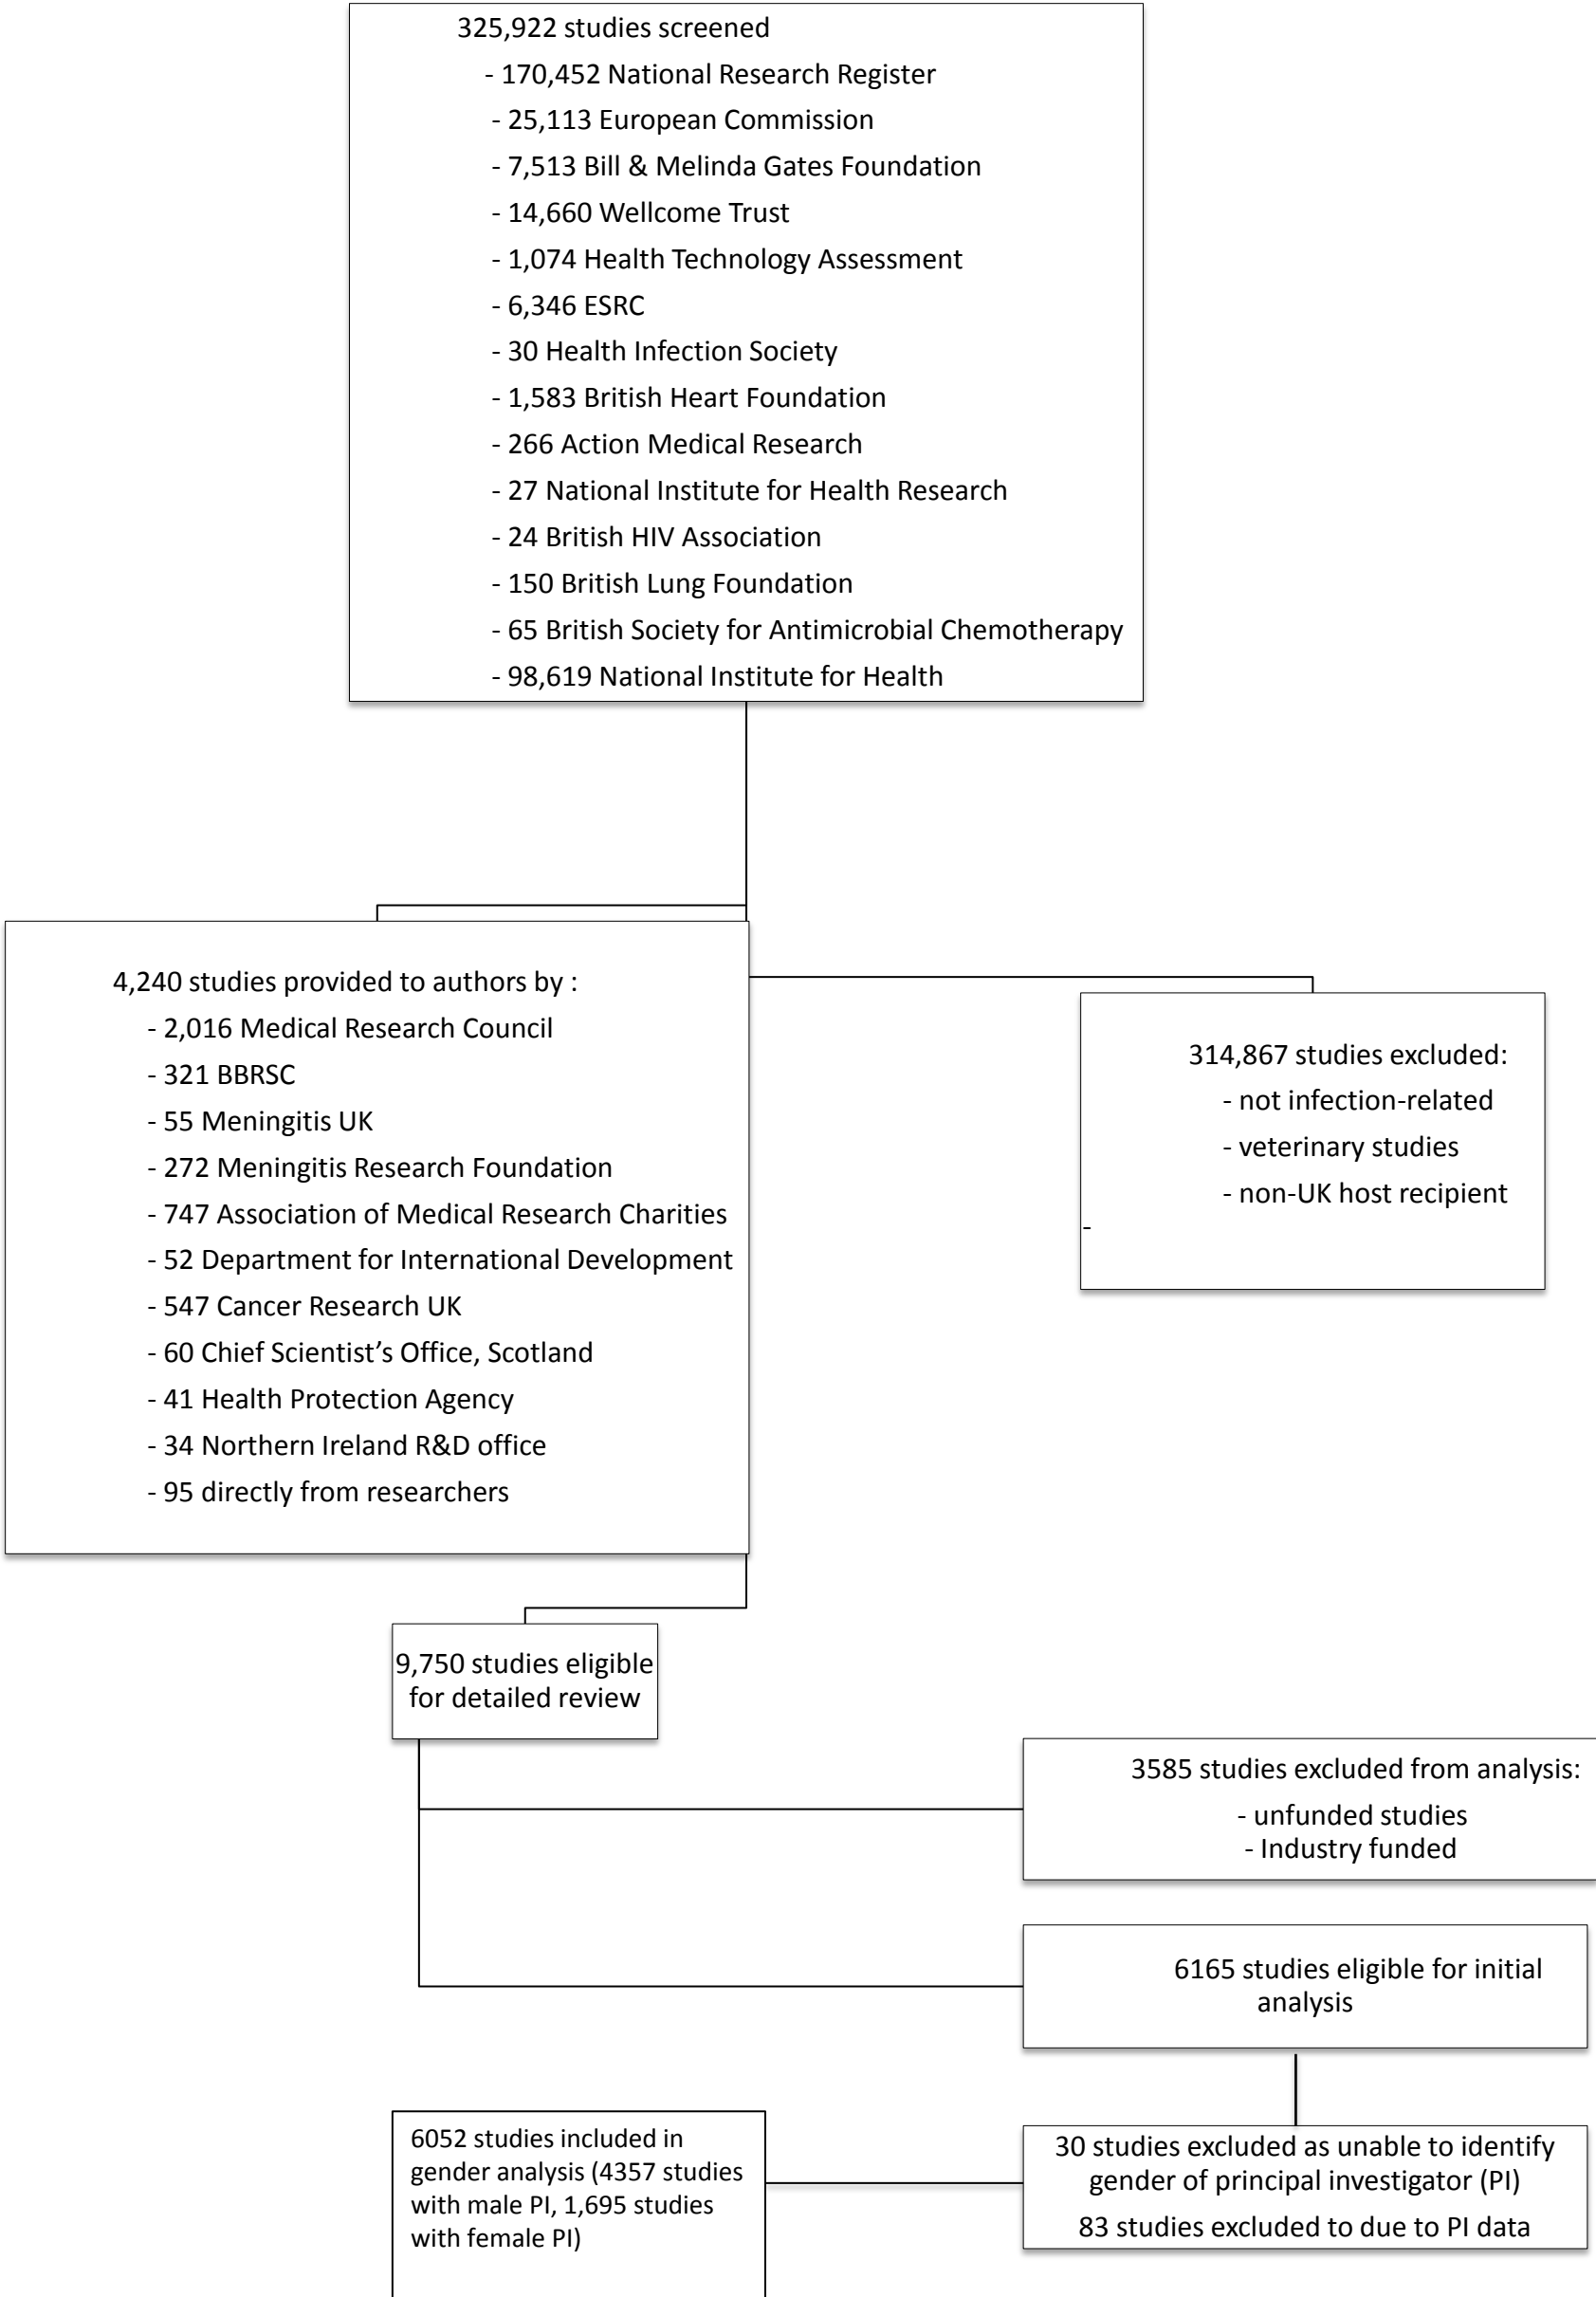

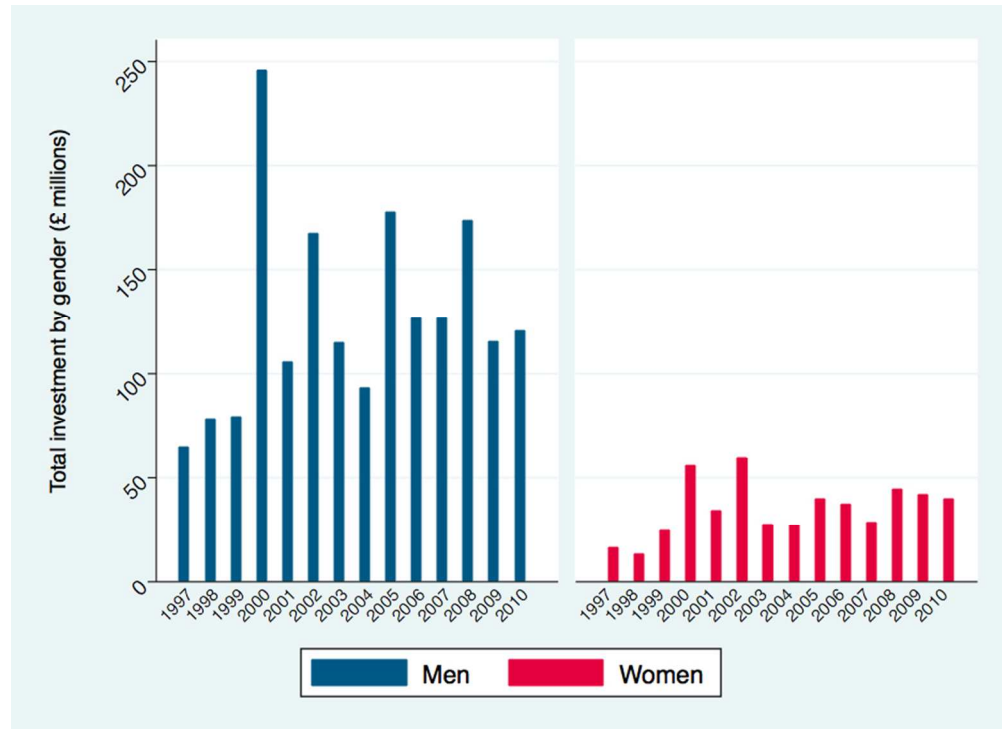

Figure 2a. Total investment over time awarded to male and female principal investigators  
329x239mm (72 x 72 DPI)

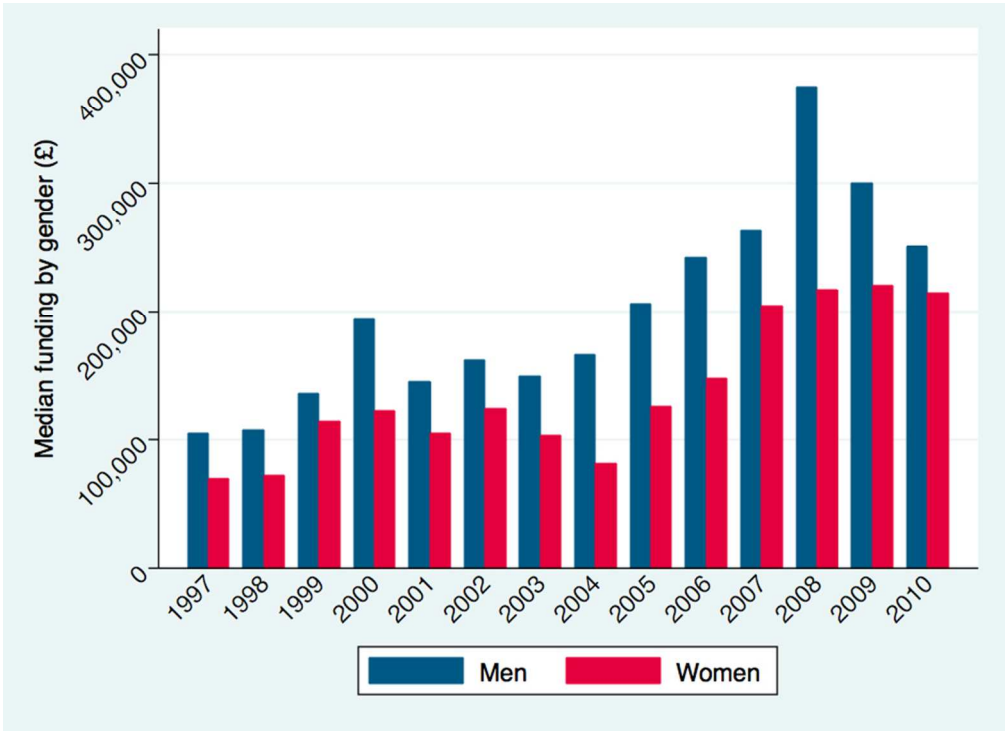

Figure 2b Median investment over time awarded to male and female principal investigators  
329x239mm (72 x 72 DPI)

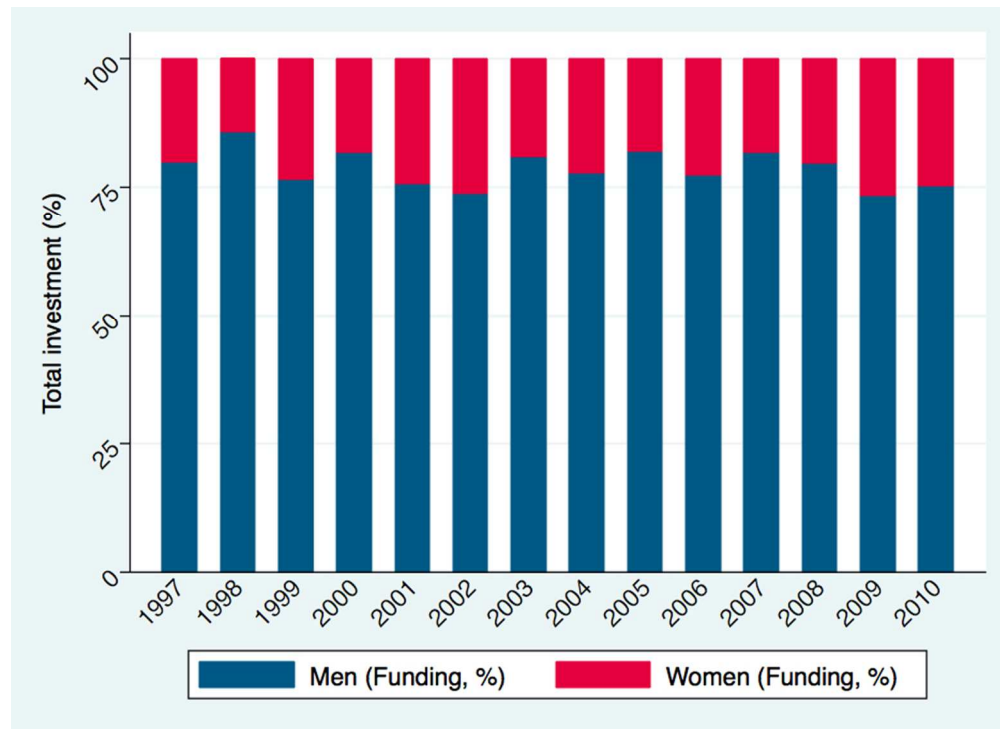

Figure 3a. Proportion of investment over time awarded to male and female principal investigators  
329x239mm (72 x 72 DPI)

1  
2  
3  
4  
5  
6  
7  
8  
9  
10  
11  
12  
13  
14  
15  
16  
17  
18  
19  
20  
21  
22  
23  
24  
25  
26  
27  
28  
29  
30  
31  
32  
33  
34  
35  
36  
37  
38  
39  
40  
41  
42

Operational research

Product development

Phase 1, 2, 3 trials

Preclinical

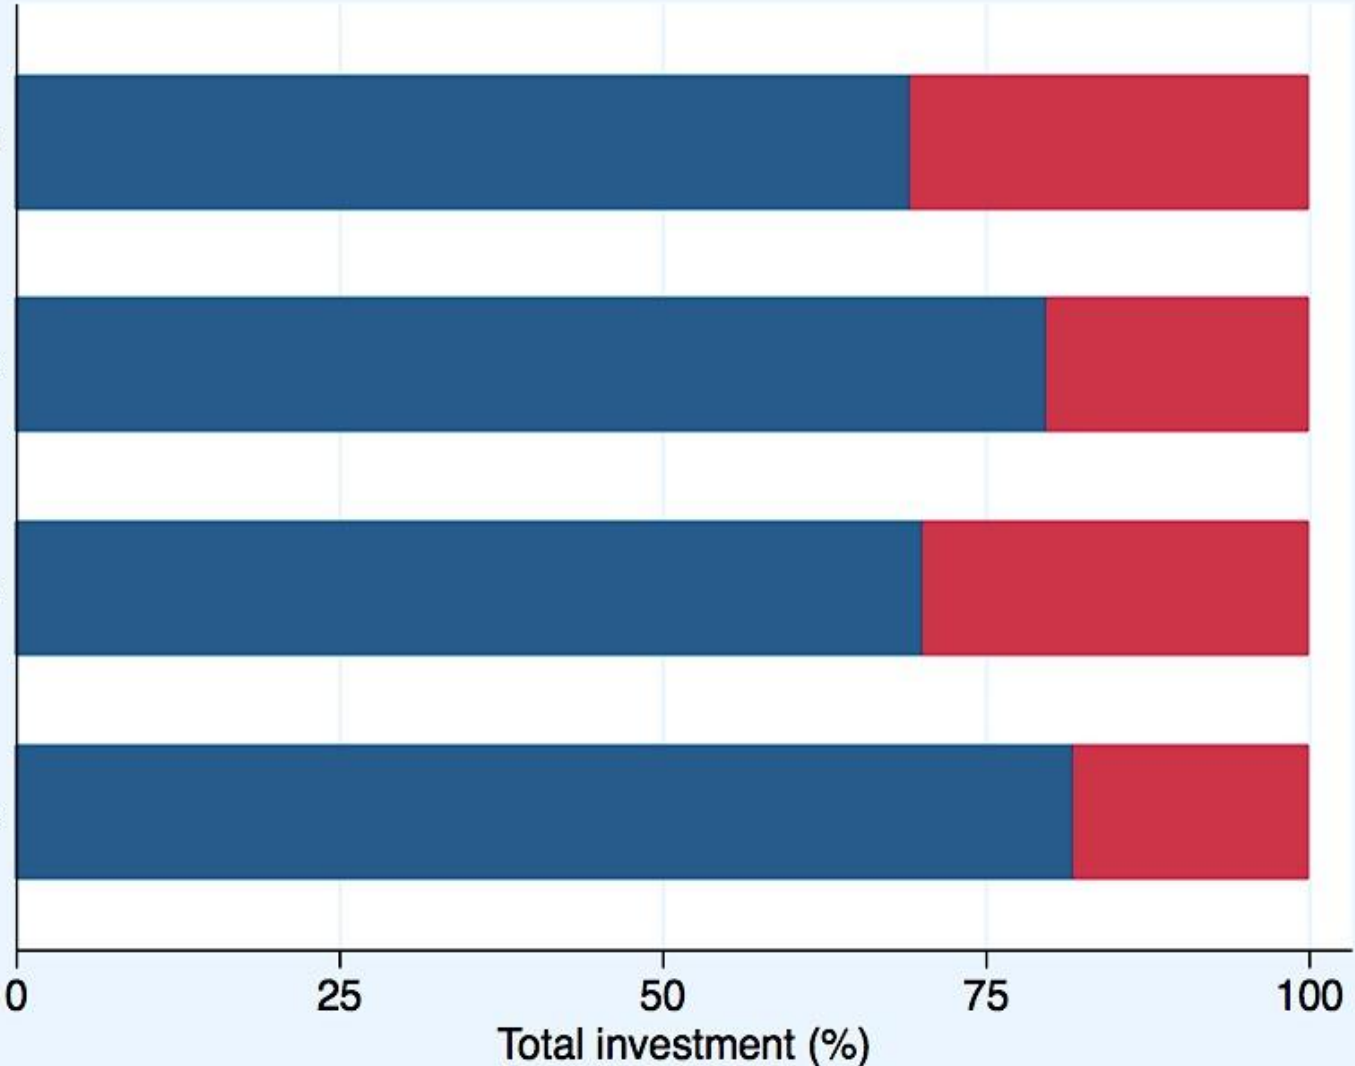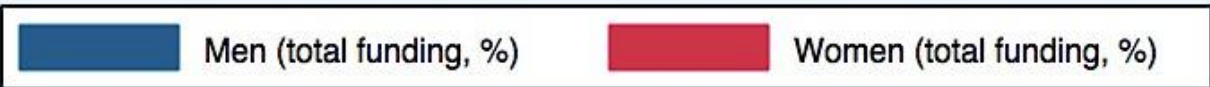

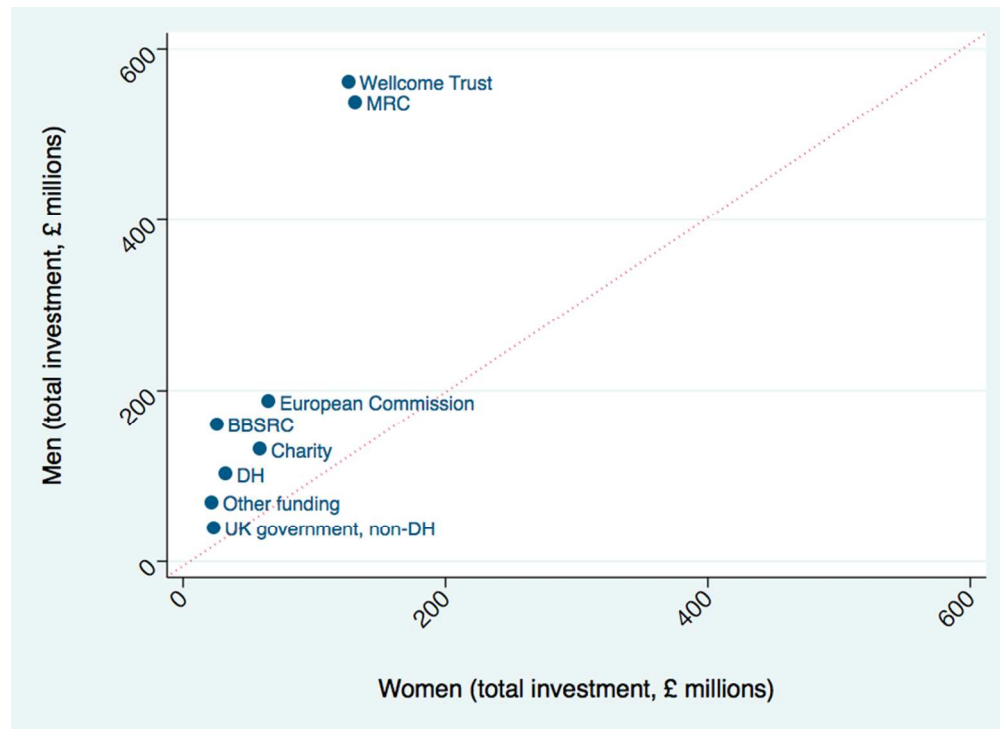

329x239mm (72 x 72 DPI)

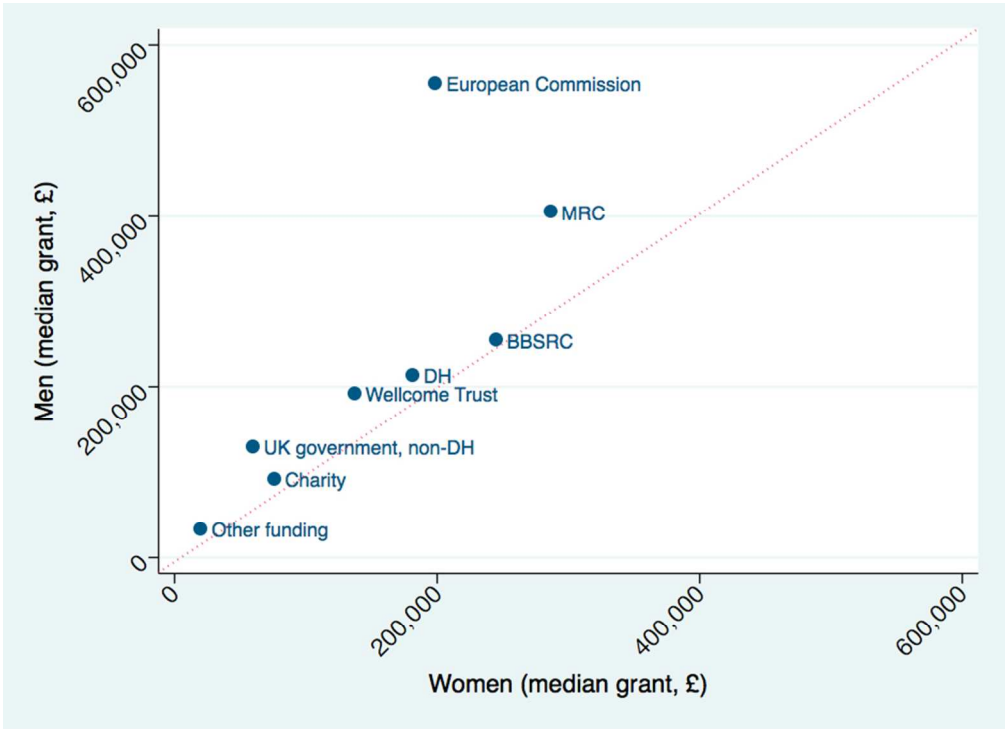

329x239mm (72 x 72 DPI)

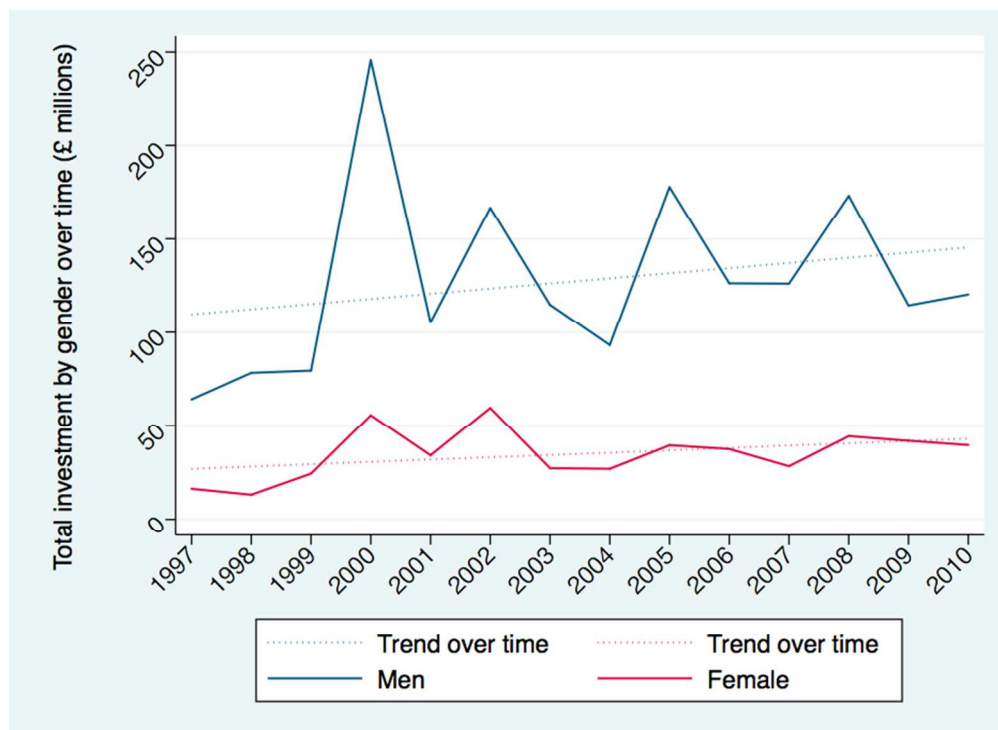

329x239mm (72 x 72 DPI)

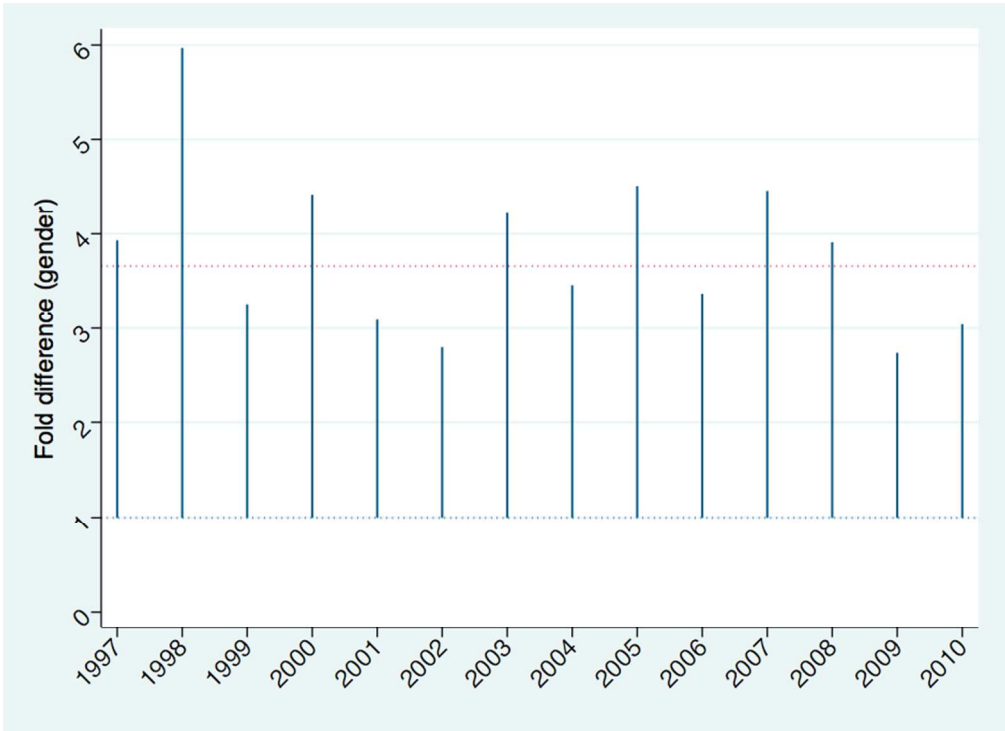

Figure 5b. Fold difference of investment over time, by gender  
329x239mm (72 x 72 DPI)

| Disease system                   | Investment (total); £ (%) | Investment (male); £ (%) | Investment (female); £ | Fold difference | Studies (total); n | Studies (male); £ | Studies (female); n | Fold difference | Mean grant (total); £ | Mean grant (male); £ | Mean grant (female); £ | Fold difference | P    | Median grant (total); £ (IQR) | Median grant (male); £ | Median grant (female); £ | Fold difference | Chi-square | P    |
|----------------------------------|---------------------------|--------------------------|------------------------|-----------------|--------------------|-------------------|---------------------|-----------------|-----------------------|----------------------|------------------------|-----------------|------|-------------------------------|------------------------|--------------------------|-----------------|------------|------|
| 1 Gastrointestinal infections    | 248,971,849               | 209,315,616              | 37,043,642             | 5.65            | 799                | 638               | 149                 | 4.28            | 315,154               | 328,081              | 248,615                | 1.32            | 0.01 | 199,043                       | 208,369                | 155,066                  | 1.34            | 6.87       | 0.01 |
| 2                                | 9.6%                      | 85.0%                    | 15.0%                  |                 | 12.9%              | 81.1%             | 18.9%               |                 | 457,988               | 458,720              | 433,176                |                 |      | 721,37-351,372                | 78,852-357,771         | 143,637-305,928          |                 |            |      |
| 3 Haematological infections      | 413,489,870               | 225,660,012              | 56,021,079             | 4.03            | 742                | 540               | 183                 | 2.95            | 557,264               | 417,889              | 306,126                | 1.37            | 0.01 | 157,280                       | 160,655                | 121,353                  | 1.32            | 3.15       | 0.08 |
| 4                                | 15.9%                     | 80.1%                    | 19.9%                  |                 | 12.0%              | 74.7%             | 25.3%               |                 | 2,179,537             | 914,626              | 819,910                |                 |      | 157,280-362,727               | 54,244-366,795         | 32,207- 271,883          |                 |            |      |
| 5 Hepatic infections             | 73,965,716                | 57,998,793               | 15,618,661             | 3.71            | 322                | 229               | 90                  | 2.54            | 229,707               | 253,270              | 173,541                | 1.46            | 0.07 | 114,621                       | 118,638                | 68,620                   | 1.73            | 3.82       | 0.05 |
| 6                                | 2.8%                      | 78.8%                    | 21.2%                  |                 | 5.2%               | 71.8%             | 28.2%               |                 | 375,988               | 418,392              | 237,165                |                 |      | 40,076-244,293                | 41,342-269,625         | 26,270-221,952           |                 |            |      |
| 7 Neglected tropical diseases    | 229,606,965               | 118,477,812              | 37,747,437             | 3.14            | 392                | 280               | 105                 | 2.67            | 564,145               | 418,439              | 406,270                | 1.03            | 0.28 | 249,458                       | 257,736                | 199,648                  | 1.29            | 0.82       | 0.36 |
| 8                                | 8.8%                      | 75.8%                    | 24.2%                  |                 | 6.4%               | 72.7%             | 27.3%               |                 | 2,104,383             | 509,169              | 667,547                |                 |      | 91,196-451,453                | 82,786-429,781         | 107,474-413,242          |                 |            |      |
| 9 Parasitological infections     | 101,885,586               | 79,281,163               | 18,779,321             | 4.22            | 339                | 268               | 67                  | 4.00            | 300,548               | 295,825              | 280,288                | 1.06            | 0.67 | 155,404                       | 153,724                | 166,514                  | 0.92            | 0.19       | 0.66 |
| 10                               | 3.9%                      | 80.8%                    | 19.2%                  |                 | 5.5%               | 80.0%             | 20.0%               |                 | 463,870               | 474,995              | 329,198                |                 |      | 64,434-334,128                | 64,702-298,665         | 33,886-399,971           |                 |            |      |
| 11 Zoonotic infections           | 7,407,218                 | 5,788,089                | 1,619,129              | 3.57            | 36                 | 24                | 12                  | 2.00            | 205,756               | 241,170              | 134,927                | 1.79            | 0.92 | 120,849                       | 146,169                | 102,901                  | 1.42            | 0.00       | 1.00 |
| 12                               | 0.3%                      | 78.1%                    | 21.9%                  |                 | 0.6%               | 66.7%             | 33.3%               |                 | 280,206               | 327,354              | 132,475                |                 |      | 7,860-293,837                 | 6,344-348,501          | 23,666-232,501           |                 |            |      |
| 13 Respiratory infections        | 418,838,875               | 312,055,217              | 84,436,423             | 3.70            | 1,190              | 897               | 272                 | 3.30            | 351,375               | 347,888              | 310,428                | 1.12            | 0.13 | 158,966                       | 165,813                | 142,281                  | 1.17            | 1.87       | 0.17 |
| 14                               | 16.1%                     | 78.7%                    | 21.3%                  |                 | 19.3%              | 76.7%             | 23.3%               |                 | 661,990               | 624,555              | 558,282                |                 |      | 50,203-342,049                | 56,715-344,512         | 36,236-311,548           |                 |            |      |
| 15 Sexually-transmitted infectio | 138,616,211               | 86,016,584               | 45,352,512             | 1.90            | 380                | 190               | 182                 | 1.04            | 366,710               | 452,719              | 249,190                | 1.82            | 0.34 | 94,790                        | 93,495                 | 101,785                  | 0.92            | 0.17       | 0.68 |
| 16                               | 5.3%                      | 65.5%                    | 34.5%                  |                 | 6.2%               | 51.1%             | 48.9%               |                 | 958,450               | 1,142,638            | 647,494                |                 |      | 15,332-241,505                | 18,389-257,444         | 14,480-204,559           |                 |            |      |
| 17 HIV                           | 477,555,690               | 290,848,557              | 79,652,343             | 3.65            | 760                | 448               | 286                 | 1.57            | 625,073               | 649,216              | 278,505                | 2.33            | 0.01 | 147,404                       | 163,462                | 114,272                  | 1.43            | 3.87       | 0.05 |
| 18                               | 18.4%                     | 78.5%                    | 21.5%                  |                 | 12.3%              | 61.0%             | 39.0%               |                 | 2,276,762             | 1,550,920            | 545,657                |                 |      | 37,195-395,644                | 39,153-511,800         | 29,880-305,339           |                 |            |      |
| 19 Overall                       | 2,599,985,851             | 1,785,979,172            | 488,178,602            | 3.66            | 6,170              | 4,357             | 1,695               | 2.57            | 421,733               | 409,910              | 288,011                | 1.42            | 0.01 | 158,055                       | 179,389                | 125,556                  | 1.43            | 74.40      | 0.01 |
| 20                               |                           | 78.53%                   | 21.47%                 |                 |                    | 71.99%            | 28.01%              |                 | 1,315,935             | 840,087              | 704,474                |                 |      | 49,490-352,699                | 59,146-371,977         | 30,983-261,835           |                 |            |      |









| Year          | Investment<br>(male); £ | Change from<br>previous year<br>(male); £ | Fold<br>difference<br>(male) | P    | Change<br>over 1997<br>(male); £ | Fold<br>difference<br>(male) | P    | Investment<br>(female); £ | Change from<br>previous year<br>(female); £ | Fold<br>difference<br>(female) | P    | Change<br>over 1997<br>(female); £ | Fold<br>difference<br>(female) | P    | Investme<br>nt (male);<br>% | Investment<br>(female);<br>% | Absolute<br>difference<br>(gender) | Fold<br>difference<br>(gender) |
|---------------|-------------------------|-------------------------------------------|------------------------------|------|----------------------------------|------------------------------|------|---------------------------|---------------------------------------------|--------------------------------|------|------------------------------------|--------------------------------|------|-----------------------------|------------------------------|------------------------------------|--------------------------------|
| 1997          | 64,158,003              |                                           |                              |      |                                  |                              |      | 16,305,109                |                                             |                                |      |                                    |                                |      | 79.7%                       | 20.3%                        | 47,852,894                         | 3.93                           |
| 1998          | 78,287,824              | 14,129,821                                | 1.22                         | 0.57 | 14,129,821                       | 1.22                         | 0.57 | 13,110,597                | -3,194,512                                  | 0.80                           | 0.90 | -3,194,512                         | 0.80                           | 0.90 | 85.7%                       | 14.3%                        | 65,177,227                         | 5.97                           |
| 1999          | 79,477,324              | 1,189,500                                 | 1.02                         | 0.37 | 15,319,321                       | 1.24                         | 0.14 | 24,366,507                | 11,255,911                                  | 1.86                           | 0.79 | 8,061,398                          | 1.49                           | 0.88 | 76.5%                       | 23.5%                        | 55,110,816                         | 3.26                           |
| 2000          | 245,740,477             | 166,263,153                               | 3.09                         | 0.00 | 181,582,474                      | 3.83                         | 0.01 | 55,636,657                | 31,270,150                                  | 2.28                           | 0.01 | 39,331,548                         | 3.41                           | 0.01 | 81.5%                       | 18.5%                        | 190,103,820                        | 4.42                           |
| 2001          | 105,423,252             | -140,317,225                              | 0.43                         | 0.09 | 41,265,248                       | 1.64                         | 0.01 | 34,133,067                | -21,503,591                                 | 0.61                           | 0.23 | 17,827,958                         | 2.09                           | 0.01 | 75.5%                       | 24.5%                        | 71,290,185                         | 3.09                           |
| 2002          | 166,695,481             | 61,272,230                                | 1.58                         | 0.89 | 102,537,478                      | 2.60                         | 0.01 | 59,568,874                | 25,435,807                                  | 1.75                           | 0.41 | 43,263,765                         | 3.65                           | 0.01 | 73.7%                       | 26.3%                        | 107,126,607                        | 2.80                           |
| 2003          | 114,827,602             | -51,867,880                               | 0.69                         | 0.03 | 50,669,599                       | 1.79                         | 0.50 | 27,241,313                | -32,327,560                                 | 0.46                           | 0.14 | 10,936,204                         | 1.67                           | 0.05 | 80.8%                       | 19.2%                        | 87,586,288                         | 4.22                           |
| 2004          | 93,129,587              | -21,698,015                               | 0.81                         | 0.09 | 28,971,584                       | 1.45                         | 0.30 | 26,908,997                | -332,316                                    | 0.99                           | 0.91 | 10,603,888                         | 1.65                           | 0.04 | 77.6%                       | 22.4%                        | 66,220,590                         | 3.46                           |
| 2005          | 177,791,995             | 84,662,408                                | 1.91                         | 0.03 | 113,633,992                      | 2.77                         | 0.26 | 39,460,786                | 12,551,789                                  | 1.47                           | 0.60 | 23,155,677                         | 2.42                           | 0.01 | 81.8%                       | 18.2%                        | 138,331,209                        | 4.51                           |
| 2006          | 126,329,085             | -51,462,910                               | 0.71                         | 0.60 | 62,171,082                       | 1.97                         | 0.54 | 37,473,263                | -1,987,522                                  | 0.95                           | 0.35 | 21,168,154                         | 2.30                           | 0.03 | 77.1%                       | 22.9%                        | 88,855,822                         | 3.37                           |
| 2007          | 126,144,324             | -184,761                                  | 1.00                         | 0.03 | 61,986,320                       | 1.97                         | 0.12 | 28,293,204                | -9,180,059                                  | 0.76                           | 0.01 | 11,988,095                         | 1.74                           | 0.48 | 81.7%                       | 18.3%                        | 97,851,119                         | 4.46                           |
| 2008          | 173,132,770             | 46,988,446                                | 1.37                         | 0.07 | 108,974,767                      | 2.70                         | 0.01 | 44,307,821                | 16,014,617                                  | 1.57                           | 0.70 | 28,002,712                         | 2.72                           | 0.73 | 79.6%                       | 20.4%                        | 128,824,949                        | 3.91                           |
| 2009          | 114,490,290             | -58,642,480                               | 0.66                         | 0.12 | 50,332,287                       | 1.78                         | 0.01 | 41,820,953                | -2,486,868                                  | 0.94                           | 0.03 | 25,515,844                         | 2.56                           | 0.01 | 73.2%                       | 26.8%                        | 72,669,337                         | 2.74                           |
| 2010          | 120,351,159             | 5,860,868                                 | 1.05                         | 0.33 | 56,193,155                       | 1.88                         | 0.01 | 39,551,453                | -2,269,500                                  | 0.95                           | 0.56 | 23,246,344                         | 2.43                           | 0.06 | 75.3%                       | 24.7%                        | 80,799,705                         | 3.04                           |
| Mean          | 127,569,941             | 4,322,550                                 |                              |      | 68,289,779                       |                              |      | 34,869,900                | 1,788,180                                   |                                |      | #####                              |                                |      | 78.6%                       | 21.4%                        | 92,700,041                         |                                |
| SD            | 48,770,855              | 76,214,220                                |                              |      | 47,073,847                       |                              |      | 13,365,475                | 17,657,139                                  |                                |      | #####                              |                                |      |                             |                              | 38,264,674                         |                                |
| Total Gende   | 1,785,979,172           |                                           |                              |      |                                  |                              |      | 488,178,602               |                                             |                                |      |                                    |                                |      |                             |                              | 1,297,800,569                      | 3.66                           |
| Total Overall | 2,599,985,851           |                                           |                              |      |                                  |                              |      |                           |                                             |                                |      |                                    |                                |      |                             |                              |                                    |                                |



**Disparities in research funding for women scientists:  
systematic analysis of UK investments in global infectious  
disease research 1997–2010**

|                                    |                                                                                                                                                                                                                                                                             |
|------------------------------------|-----------------------------------------------------------------------------------------------------------------------------------------------------------------------------------------------------------------------------------------------------------------------------|
| Journal:                           | <i>BMJ Open</i>                                                                                                                                                                                                                                                             |
| Manuscript ID:                     | bmjopen-2013-003362.R1                                                                                                                                                                                                                                                      |
| Article Type:                      | Research                                                                                                                                                                                                                                                                    |
| Date Submitted by the Author:      | 22-Aug-2013                                                                                                                                                                                                                                                                 |
| Complete List of Authors:          | Head, Michael; University College London, Infection & Population Health<br>Fitchett, Joseph; London School of Hygiene & Tropical Medicine,<br>Cooke, Mary; University College London,<br>Wurie, Fatima; University College London,<br>Atun, Rifat; Imperial College London, |
| <b>Primary Subject<br>Heading</b>: | Infectious diseases                                                                                                                                                                                                                                                         |
| Secondary Subject Heading:         | Global health                                                                                                                                                                                                                                                               |
| Keywords:                          | INFECTIOUS DISEASES, PUBLIC HEALTH, STATISTICS & RESEARCH<br>METHODS, VIROLOGY, PARASITOLOGY, MYCOLOGY                                                                                                                                                                      |
|                                    |                                                                                                                                                                                                                                                                             |

SCHOLARONE™  
Manuscripts

**Disparities in research funding for women scientists: systematic analysis of UK investments in global infectious disease research 1997–2010**

Michael G Head<sup>a\*</sup>, Joseph R Fitchett<sup>b</sup>, Mary K Cooke<sup>a</sup>, Fatima B Wurie<sup>a</sup>, Rifat Atun<sup>c</sup>

a University College London, Research Department of Infection and Population Health, UCL Royal Free Campus, Rowland Hill Street, London, NW3 2PF

b London School of Hygiene & Tropical Medicine, Keppel Street, London, WC1E 7HT

c Imperial College London, South Kensington Campus, London SW7 2AZ and Harvard School of Public Health, Harvard University, Boston, USA

\*Corresponding Author

Number of Words: **3 758**

**Keywords** – gender, funding, research, women,

## Abstract

**Objectives:** There has not previously been a systematic analysis exploring gender disparities in awards for research funding. We investigated funding awards to UK institutions for all infectious disease research from 1997 to 2010, across disease categories and along the research and development continuum.

**Design:** Systematic analysis

**Methods:** Data were obtained from several sources for awards from the period 1997-2010 and each study assigned to - disease categories; type of science (pre-clinical, phases I-III trials, product development, implementation research); categories of funding organisation. Fold differences and statistical analysis were used to compare total investment, study numbers, mean grant, and median grant between men and women.

**Results:** 6052 studies were included in the final analysis, comprising 4357 grants (72.0%) awarded to men and 1695 grants (28.0%) awarded to women, totalling £2.274 billion. Of this, men received £1.786 billion (78.5%) and women £488 million (21.5%). The median value of award was greater for men (£179 389; IQR £59146–£371 977) than women (£125 556; IQR £30 982–£261 834).

Awards were greater for male PIs across all infectious disease systems, excepting neurological infections and sexually transmitted infections. The proportion of total funding awarded to women ranged from 14.3% in 1998 to 26.8% in 2009 (mean 21.4%), and was lowest for pre-clinical research at 18.2% (£285.5 million of £1.573 billion) and highest for operational research at 30.9% (£151.4 million of £489.7 million).

**Conclusions:** There are consistent disparities in funding received by men and women principal investigators: women have fewer funded studies and receive less funding in absolute and in relative terms; the median funding awarded to women is lower across most

infectious disease areas, by funder, and type of science. These disparities remain broadly unchanged over the 14-year study period.

**Article summary**

Article focus

- We explore the distribution of funding across infectious disease research by the gender of principal investigator to identify any disparities in funding received by men and women researchers in the UK.

Key messages

- There are consistent disparities in funding received by men and women principal investigators (PIs) in infectious disease research funded in the UK.
- Total funding and the median award across most disease areas and type of science is typically greater in male PIs than female PIs
- These disparities remain consistent over the time period of analysis (1997-2010)

Strengths and limitations of this study

- This is the first study to present detailed data and rigorously quantify funding disparities between men and women researchers in infectious disease research in the UK.
- Our results provides new and additional evidence on disparities on funding for men and women researchers highlighted in earlier studies and provides a case for new research explain the source of these disparities, especially given government commitments to increase the number of women in science

- We were unable to assess the success and failure rates by gender and thus cannot comment on the extent of inequalities or bias. As we could not access data on the academic ranking of principal investigators, we were hence unable to adjust for levels of seniority across both genders.

For peer review only

1  
2  
3  
4  
5  
6  
7  
8  
9  
10  
11  
12  
13  
14  
15  
16  
17  
18  
19  
20  
21  
22  
23  
24  
25  
26  
27  
28  
29  
30  
31  
32  
33  
34  
35  
36  
37  
38  
39  
40  
41  
42  
43  
44  
45  
46  
47  
48  
49  
50  
51  
52  
53  
54  
55  
56  
57  
58  
59  
60

**Introduction**

Women are under-represented in biomedical science, yet few studies have systematically explored the extent and reasons for the observed disparities between men and women scientists. Women comprise 50% of the EU student population and 45% of doctoral students, but only one third of career researchers are women – a figure that is lower for senior positions.[1]

In 2001, a Wellcome Trust survey concluded that although women were as successful as men in securing funding for biomedical research, they were less likely to apply for grant funds because of their status in scientific institutions and the level of support they received.[2] An analysis of Wellcome Trust awards in 2000-08 revealed a significant gender difference in the amount of funding awarded, even after adjusting for the seniority of the principal investigator, concluding “the most likely explanation for the difference in amounts awarded to women and men is that women are systematically less ambitious in the amounts of funding requested in their grant applications.”[3] In 2011, around 44% of academics in UK universities were women, yet only 39% of senior lecturers and 19% of professors were women.[4] Furthermore, a number of studies from the US have shown that women in science are disadvantaged compared to men.[5–7]

The low numbers of women in science and the reasons for this anomaly is a concern for scientists and policy makers. Although the UK Medical Research Council (MRC) has a gender equality scheme, which briefly states gender equality is reflected in agreements with research organisations receiving MRC funding, it is not clear how the scheme is implemented.[8]

1  
2  
3 While several initiatives have aimed to increase the numbers of women involved in science,  
4 there are no affirmative actions or binding policies in the UK or Europe to definitively ensure  
5 women are better represented in science. Indeed, some initiatives aimed at increasing  
6 women in science have been criticised. For example, in 2012, the European Commission  
7 campaign targeting 13-18 year-old secondary school students[9] was rebuked and described  
8 as an insult to women in science[10][11], with the offending video clip removed from the EU  
9 campaign website. The effects of campaigns aimed at raising the profile of women in  
10 science[12,13] have not been assessed.

11  
12  
13 We have previously undertaken a systematic analysis of research funding awarded to UK  
14 institutions for all infectious disease research, for the 14-year period from 1997 to 2010.[14]  
15 Here, we use the dataset gathered for this earlier study to examine trends over time, the  
16 distribution of funding awarded to men and women principal investigators (PIs) across  
17 specific infections, funder categories, and along the research and development (R&D)  
18 continuum, extending from pre-clinical to clinical and operational research.

## 19 20 21 22 23 24 25 26 27 28 29 30 31 32 33 34 35 36 37 38 39 40 **Methods**

41  
42 We obtained data from several sources for infectious disease research studies where  
43 funding was awarded between 1997 and 2010. The methods for the original study are  
44 elaborated in detail elsewhere,[14] and summarised here. We identified 325,922 studies for  
45 screening that covered all areas of disease from several funders, and filtered these to  
46 identify funding for infectious diseases where the lead institution was in the UK in the period  
47 and the year of award 1997-2010. We obtained data from publicly available sources and  
48 directly from the funders. We did not include private sector funding in the analysis, as  
49 pharmaceutical sector data were not publicly available. Figure 1 shows the sources of data

and the numbers of studies included and excluded at each stage of screening to reach the final set of studies for detailed analysis.

*Figure 1. Methodology flow chart for filtering studies firstly by infectious disease and then by gender*

Data collection and cleaning took place alongside routine duties between 2006 and 2011, primarily by MGH and assisted by JRF, MKC and FBW. Funding records could feasibly be obtained going back to 1997, hence the decision to cover awards during 1997-2010. We assigned each study to primary disease categories, and within each category, we documented topic-specific subsections, including specific pathogen or disease. We allocated studies to one of four categories along the R&D continuum: pre-clinical; phases I, II or III; product development; and operational research, and to one of the 26 categories for funding organisations.

Where the PI was named, we assigned them to men or women categories. The studies where only an initial was available for the forename were assigned as “unclear” if we were unable to establish the PIs gender from a review of the literature, institutional websites or publicly available publications and documents.

Reference to sexually transmitted infections excludes HIV. Neglected tropical diseases were categorised according to classification used by the World Health Organization (WHO) ([http://www.who.int/neglected\\_diseases/diseases/en](http://www.who.int/neglected_diseases/diseases/en)). Antimicrobial resistance includes antibacterial, antiviral, antifungal and antiparasitic studies.

We converted grants awarded in a currency other than pounds sterling to UK pounds using the mean exchange rate in the year of the award. We adjusted grant funding amounts for inflation and reported in 2010 UK pounds.

As well as excluding studies not immediately relevant to infection, we excluded unfunded studies, veterinary infectious disease research studies (unless there was a zoonotic component), those exploring the use of viral vectors to investigate non-communicable diseases, grants for symposia or meetings, or studies with UK contributions (e.g. as a collaborator), but the funding was awarded to a non-UK institution.

We used Microsoft Excel versions 2000 and 2007 to categorise studies. Where needed, data were exported into Microsoft Access (versions 2000 and 2007) and specific keyword queries used to select precise sections of the data for analysis. We used Stata (version 11.0) for statistical analysis and to generate figures.

We used fold differences to compare total investment, number of studies, mean grant, and median grant between men and women according to disease system, specific infection and funding organisation.

We used nonparametric Mann-Whitney rank-sum test to assess the distribution of funding by gender. Nonparametric K-sample test on equality of medians was applied to compare the median funding by gender, and reported as a chi-squared statistic without Yates' correction for continuity. Nonparametric Wilcoxon signed-rank test was applied when comparing matched data, such as time trends by gender. The significance for all tests was defined at the 5% level (two-sided  $P=0.05$ ).

We present disparities between gender and do not attempt to investigate or imply bias or inequalities as we could not access data on unsuccessful grant applications.

Results

We identified 6165 studies from the 325,922 studies screened that were suitable for inclusion in our analysis. Of these, we were unable to ascertain the gender of principal investigator for 30 studies (0.5%). We excluded 83 studies (1.3%) that did not specify the PIs name or gender – these were funded by the Bill and Melinda Gates Foundation (Gates Foundation) (38 studies; 0.6%) and the UK Department for International Development (DFID) (22 studies; 0.4%), accounting for £321.2 million (12.3% of the total). We included 6052 studies in the final analysis, comprising 4357 grants (72.0%) awarded to men and 1695 grants (28.0%) awarded to women, totalling £2.274 billion, of which £1.786 billion (78.5%) were awarded to men and £488 million (21.5%) awarded to women.

The median value of grant funding was greater for men (£179 389; IQR £59146–£371 977) than for women (£125 556; IQR £30 982–£261 834). Similarly, mean value of the grant funding was greater for men (£409 910; SD £840 087) than for women (£288 011; SD £704 474). Figure 2 shows the distribution of the total investments and median funding awarded to PIs by gender over time.

Figure 2a. Total investment over time awarded to male and female principal investigators

Figure 2b Median investment over time awarded to male and female principal investigators

Infectious disease system

Table 1A (web appendix 1) shows the total investment, total numbers of studies, mean grant funding, median grant funding and fold differences in funding according to nine disease systems and by gender of PI. We identified no infectious disease system where women led the majority of research efforts or were awarded the majority of funding. Median funding awards were greater for male PIs across all infectious disease systems, with the exception of neurological infections and sexually transmitted infections.

Greatest levels of funding awarded to men and to women were for research into respiratory infections and HIV. Men received a total of £312.1 million for research into respiratory infections compared with £84.4 million for women – a 3.70 fold difference – and a total of £290.8 million for HIV research compared with £79.7 million for women – a 3.65 fold difference.

The largest difference between total funding for men and for women was with gastrointestinal infections (5.65 fold difference) where women received only 15.0% of the total investment (£37.0 million) and spearheaded 18.9% (149) of the studies and neurological infections (4.22 fold difference). Smallest difference between total funding for men and for women was in research into sexually transmitted infections (1.90 fold difference), where women received 35.0% (£45.4 million) of the total funding and led 49.0% (182) of the studies.

Mean funding for grants was significantly greater for men (£409 910; SD £840 087) than for women (£288 011; SD £704 474). The differences in median funding were statistically significant ( $P > 0.01$ ) for gastrointestinal infections (men £328 021; SD £458 720) (women £248 615; SD £433 176), for haematological infections (men £417 889; SD £914 626)

(women £306 126; SD £819 910), and for HIV (men £649 216; SD £1 550 920) (women £278 505; SD £545 657).

Median funding for grants showed a similar pattern, with significantly greater grant funding for men (£179 389; IQR £59 146–£371 977) than women (£125 556; IQR £30 983–£261 835). Differences in median funding were statistically significant ( $P > 0.05$ ) for gastrointestinal infections (men £208 369; IQR £78 852–£357 771) (women £155 066; IQR £43 637–£305 928), for hepatic infections (men £118 638; IQR £41 342–£269 629) (women £68 620; IQR £26 720–£221 952), and for HIV (men £163 462; IQR £39 153–£511 800) (women £114 272; IQR £29 880–£305 339).

**Specific Infections**

Table 1B (web appendix 1) shows total investment, total numbers of studies, mean grant funding, median grant funding and fold differences in funding according to specific infection by gender.

Men received significantly higher levels of total research funding, spearheaded greater numbers of studies, and were awarded greater median and mean funding for grants for malaria ( $P = 0.01$ ), HIV ( $P = 0.01$ ) and influenza ( $P = 0.04$ ).

Major differences between total funding for men and for women were observed for research into candida (47.75 fold difference), rotavirus (33.65 fold difference), campylobacter (24.33 fold difference) and norovirus (23.33 fold difference). Smallest differences between total funding for men and women were for research into dengue (1.07 fold difference) and leishmaniasis (1.55 fold difference). Women received greater total funding than men for research into leprosy (0.09 fold difference), diphtheria (0.18 fold difference), chlamydia (0.36 fold difference), syphilis (0.37 fold difference), and varicella zoster (0.54 fold difference).

Differences in mean grant funding were statistically significant ( $P > 0.05$ ) for malaria research (men £590 422; SD £1 324 909) (women £318 054; SD £726 872), for influenza (men £616 643; SD £881 493) (women £387 186; SD £489 997), for respiratory syncytial virus (men £485 283; SD £539 396) (women £187 931; SD £268 412), and for HIV (men £649 216; SD £1 550 920) (women £278 505; SD £545 657).

Differences in median grant funding were statistically significant ( $P > 0.05$ ) for malaria research (men £209 646; IQR £63 826–£529 610) (women £143 358; IQR £42 754–£314 524), for hepatitis C (men £124 797; IQR £42 475–£289 293) (women £67 265; IQR £29 880–£233 467), for influenza (men £348 730; IQR £213 601–£668 561) (women £200 787; IQR £124 210–£398 191), for herpes simplex virus (men £119 295; IQR £40 009–£446 395) (women £309 610; IQR £147 885–£439 305), and for HIV (men £163 462; IQR £39 153–£511 800) (women £114 272; IQR £29 880–£305 339).

Figure 3 shows the proportion of total funding awarded to principal investigators by gender over time and a breakdown of investment by research pipeline. The proportion of the total funding awarded to women ranged from 14.3% (in 1998) to 26.8% (in 2009), with a mean proportion of 21.4% for the period studied. The proportion of funding was lowest for pre-clinical research at 18.2% (£285.5 million of £1.573 billion total) and highest for operational research at 30.9% (£151.4 million of £489.7 million). The funding for clinical (Phase I, II and III) research was 29.9% (£25.5 of £85.2) and for product development amounted to 20.4% (£25.8 million of £126.6 million).

*Figure 3a. Proportion of investment over time awarded to male and female principal investigators*

Figure 3b. Total investment by research pipeline awarded to male and female principal investigators

Funding organisation

Table 2 (web appendix 2) shows in detail the total investment, total numbers of studies, mean grant funding, median grant funding and fold differences in funding according to funding organisation and by gender.

Public funding organisations invested a total of £1.025 billion in research led by men (78.6%) and £279.8 in research led by women (21.4%). Greatest levels of funding awarded to men and to women were by the Wellcome Trust and the UK MRC. Major differences between funding awarded to men and to women PIs were by the BBSRC, with a 6.12 fold difference. Smallest differences between funding awarded to men and to women were by the UK Government funding streams such as the National Institute for Health Research, with a 1.66 fold difference. Mean grant funding from public funding organisations were significantly greater for men at £595 361 (SD £1 080 718) than for women at £448 414 (SD £814 979). Differences were also statistically significant ( $P > 0.01$ ) for UK MRC grants with men at £751 413 (SD £1 020 748) and women at £544 427 (SD £884 442), and for UK Government grants with men at £208 828 (SD £492 519) and women at £182 907 (SD £619 889).

Median grant funding from public funding organisations had a similar pattern with significantly greater grant funding for men at £272 452 (IQR £138 322–£572 529) and women at £213 718 (IQR £92 880–£402 917). Differences were also statistically significant ( $P > 0.05$ ) for UK MRC grants with men at £404 615 (IQR £ 210 068–£811 860) and women at £286 679 (£178 182–£468 998), and for UK Government grants with men at £129 660 (IQR £23 761–£207 320) and women at £59 976 (IQR £12 564–£157 053).

Philanthropic funding organisations invested a total of £691.7 million in research led by men (78.8%) and £185.9 million in research led by women (21.2%).

Mean grant funding from philanthropic funding organisations were significantly greater for men at £338 396 (SD £695 025) than for women at £242 014 (SD £711 420). Differences were also statistically significant ( $P > 0.01$ ) for Wellcome Trust grants with men receiving £393 652 (SD £723 549) and women £230 168 (SD £362 836), and for other charitable funding organisations with men receiving £211 190 (SD £454 108) and women £271 842 (SD £1 208 852).

Median grants from philanthropic funding organisations showed a similar pattern with significantly greater grant funding for men at £153 653 (IQR £58 589 – £302 774) and women at £114 173 (IQR £42 658 – £222 842). Differences were also statistically significant ( $P > 0.05$ ) for Wellcome Trust grants with men receiving £191 461 (IQR £74 759 – £362 424) and women £137 241 (IQR £54 019 – £250 723), and for other charitable funding organisations with men receiving £91 991 (IQR £36 429 – £172 497) and women £76 058 (IQR £17 279 – £150 727).

Figure 4 shows the association between funding organisation and total investment and median funding by gender. The MRC awarded the highest median amount in grants to women (£286 679; IQR £178 182–£468 998), but the median funding amount in grants for men were 1.41 fold higher than that awarded to women (£404 615; IQR £210 068–£811 860). European Commission awarded the highest mean grants to women at £923 364 (SD £1 316 016) however mean funding amount in grants for men were 1.44 fold higher at £1325 149 (SD £2 409 860) than that for women.

*Figure 4a. Association between funding organisation and total investment by gender*

*Figure 4b. Association between funding organisation and median award by gender*

*Time trend*

Table 3 (web appendix 3) shows in detail the trends in funding over time from 1997 to 2010 by gender of principal investigators, with amounts and relative proportions each year of funding. Mean annual funding received was greater by men at £127.6 million (SD £48.7 million) than women at £34.9 million (SD £13.4 million). Proportions of annual funding received by men ranged from 73.2% to 85.7%, with a mean of 78.6%.

Proportions of annual funding received by women ranged from 14.3% to 26.8% with a mean of 21.4%. The largest annual funding received by men was £245.7 million in 2000, and the smallest at £64.2 million in 1997. The largest annual funding received by women was £59.6 million in 2002, with the smallest at £13.1 million in 1998.

Over the 14-year study period, the proportion of investment awarded to women each year remains relatively unchanged with a mean of 21.4% of total (range 14.3%–26.8%; £13.1 million to £59.6 million). Figure 5 shows the funding trends over time and fold differences in total investments by gender. Absolute difference in the funding amounts in the grants awarded to men and women ranges between £47.9 million and £190.1 million, with a mean difference of £92.7 million (SD £38.3 million). Fold difference in grant funding for men and women ranged from 2.74 to 5.97, with a mean fold difference of 3.66.

*Figure 5a. Total investment and trend over time, by gender*

*Figure 5b. Fold difference of investment over time, by gender*

## Discussion

We present the first detailed and systematic analysis by gender of investments in infectious disease research in the UK for the 14-year period 1997-2010. We identified 6165 studies funded by public and philanthropic funding organisations, with total research investment of £2.6 billion.

We quantified the differences in research funding awarded by gender to show these to be substantial. The analysis shows clear and consistent disparities between men and women principal investigators, with lower funding in terms of the total investment, the number of funded studies, the median funding awarded and the mean funding awarded across most of the infectious disease areas funded. Women received less funding in absolute amounts and in relative terms, by funder and the type of science funded along the R&D pipeline. These disparities in funding between men and women persist over time.

We show large disparities in median funding amounts for men and women researchers in investments by the European Commission and the MRC. Such differences were much less apparent when comparing funding from the Department of Health and BBSRC, although the BBSRC awarded 86% of funding to men. The BBSRC almost entirely funds pre-clinical research,[14] and this matches the increased proportions of pre-clinical studies being led by male principal investigators.

Our findings in infectious disease research, the most detailed to date, provide new evidence on disparities between men and women researchers, to reinforce the concerns raised in earlier studies.[4,15,16] Disparities that are more marked at senior levels of academia need to be investigated to explain and account for the observed differences.

The reasons why the median awards across most infectious disease conditions should be significantly less for women principal investigators cannot be deduced from the available data. The next step may be to investigate success rates by gender to assess how many women are applying, and what proportion of the initial request for funding is actually allocated.

There have been suggestions that women are systematically less ambitious in the amounts of funding requested in their grant applications when compared with men who are equivalently ranked academically, and that relatively simple mentoring programmes could at least partially overcome this anomaly.[3] However, there is no evidence supporting these assertions. Others have suggested that systems which ensure PI anonymity during review of grant funding submissions may help reduce the presence of any subtle gender biases[17], though in practice this approach would be challenging as the experience of the PI is a key factor when considering suitability of request for research support. However, evidence on effective interventions to address barriers for women scientists are lacking.[16] Women of child-bearing age are being disadvantaged in some areas of employment, even though in relation to scientific endeavour, productivity as measured by published outputs is not significantly different between women with and without children.[15]

*Study limitations*

Our analysis has several limitations. We rely on the accuracy of the original data from the funding organisations and as described elsewhere we have excluded data from the private sector as the publicly available data are incomplete.[14]

In the period analysed, we were not able to find data on the number of men and women PIs requesting financial support for research agencies from the funding sources studies. Hence,

we were unable to assess the success and failure rates by gender. We also did not have complete data on the amount of funding initially requested, the gender of co-applicants for each study, the total pool of researchers in each disease area and within each type of science, or the proportion of awards made to clinical and non-clinical researchers, all of which would be useful pieces of information in developing a clearer picture of the reasons for the presented differences. The proportion of doctors registered in the UK favours men (56.8% as of January 2013) over women,[18] but the proportion of those carrying out research appears to be unknown. Understanding the distribution of researchers is critical to understanding the research landscape.

We lacked data on the academic ranking of principal investigators and were hence unable to adjust for levels of seniority across both genders. We were unable to get data on gender from the Gates Foundation and DFID and hence were unable to clarify the gender of a small proportion of investigators, though we believe this limitation is not likely to change the conclusions of the study. Our analysis focuses on infectious disease research, and analysis of other areas of scientific research would be needed if these disparities persisted for all research areas.

## **Conclusions**

Notwithstanding limitations, our systematic analysis shows unequal distribution of investments in infectious disease research for men and women. There are fewer women receiving funding as principal investigators in infectious disease research, with fewer studies funded with lower funding amounts when successful.

Although earlier studies have discussed possible solutions, including mentoring programmes and advertising campaigns, none have systematically explored the reasons why such

differences persist. Hence, without an understanding of the reasons for the observed disparities, the proposed solutions are not very meaningful. There is no evidence that women and men researchers are not equally able, hence, other factors are likely to be at play to explain the observed disparities which have persisted over the 14-year study period. Research is needed to elucidate an understanding of the factors that can explain the observed disparities. We strongly urge policy makers, funders and scientists to urgently investigate the factors leading to the observed disparities and develop policies developed to address them, in order to ensure that women are appropriately supported in scientific endeavour.

**Funding**

This research received no specific grant from any funding agency in the public, commercial or not-for-profit sectors

**Author contribution**

MGH designed the study with input from RA and JF and collated the dataset. JRF, FW and MKC checked and refined the dataset. JRF undertook data analysis and created the graphs and figures with input from MGH and RA. MGH, JRF, and RA interpreted the data and wrote the first draft. MGH, JRF, and RA refined the analysis and paper with input from MKC and FBW. All authors reviewed and approved the final version. MH is guarantor of the paper.

**Competing interests**

RA has received research funding from the UK Medical Research Council, the UK National Institute for Health Research, UK CRC, UK EPSRC, the UK Department for International Development and the UK Department of Health. RA is a member of the UL Medical

Research Council Global Health Group. MGH works for the Infectious Disease Research Network, which has supported this work and is funded by the UK Department of Health. JRF has received funds from the Wellcome Trust and is a steering group member for the Infectious Disease Research Network. MKC has received funding from the Medical Research Council and the Bill & Melinda Gates Foundation. FBW has received funds from UCLH Charitable Foundation.

### **Acknowledgements**

We thank Jennifer Harris and Raidah Haider for their input and assistance, and acknowledge the assistance of the research and development funding agencies for provision of data.

### **Data-sharing statement**

All gender data is available with this submission. Further data relating to the Research Investments project can be found at [www.researchinvestments.org](http://www.researchinvestments.org) or by contacting the corresponding author.

References

1       More women in senior positions. Key to economic stability and growth. European  
2       Commission, Luxembourg: 2010.

3       Blake M, La Valle I. Who applies for research funding? Key factors shaping funding  
4       application behaviour among women and men in British higher education institutions.  
5       London: 2000.

6       Bedi G, Van Dam NT, Munafo M. Gender inequality in awarded research grants.  
7       *Lancet* 2012;**380**:474.

8       Fitzpatrick S. A Survey of Staffing Levels of Medical Clinical Academics in UK Medical  
9       Schools as at 31 July 2011. London: 2012.  
10       [http://www.medschools.ac.uk/Publications/Documents/MS\\_Clinical\\_Academic\\_Staff](http://www.medschools.ac.uk/Publications/Documents/MS_Clinical_Academic_Staff_Survey_310711.pdf)  
11       [\\_Survey\\_310711.pdf](http://www.medschools.ac.uk/Publications/Documents/MS_Clinical_Academic_Staff_Survey_310711.pdf) (date accessed 22 August 2013)

12       Burrelli J. Thirty-Three Years of Women in S&E Faculty Positions - US National  
13       Science Foundation. Arlington: 2008. <http://www.nsf.gov/statistics/infbrief/nsf08308/>  
14       (date accessed 22 August 2013)

15       Lincoln AE, Pincus SH, Leboy PS. Scholars' awards go mainly to men. *Nature*  
16       2011;**469**:472.

17       Pohlhaus JR, Jiang H, Sutton J. Sex differences in career development awardees'  
18       subsequent grant attainment. *Annals of internal medicine* 2010;**152**:616–7; author  
19       reply 617.

20       Medical Research Council. MRC Gender Equality Scheme.  
21       2007.<http://www.mrc.ac.uk/Utilities/Documentrecord/index.htm?d=MRC003655> (date  
22       accessed 22 August 2013).

23       European Commission. About this site- Science: It's a girl thing! 2012. [http://science-](http://science-girl-thing.eu/en/about-this-site)  
24       [girl-thing.eu/en/about-this-site](http://science-girl-thing.eu/en/about-this-site) (date accessed 22 August 2013)

25       Gill M. "Science, it's a girl thing!" says EU Commission, holding lipstick and bunsen  
26       burner. New Statesman. 2012. [http://www.newstatesman.com/blogs/martha-](http://www.newstatesman.com/blogs/martha-gill/2012/06/science-its-girl-thing-says-eu-commission-holding-lipstick-and-bunsen-burn)  
27       [gill/2012/06/science-its-girl-thing-says-eu-commission-holding-lipstick-and-bunsen-](http://www.newstatesman.com/blogs/martha-gill/2012/06/science-its-girl-thing-says-eu-commission-holding-lipstick-and-bunsen-burn)  
28       [burn](http://www.newstatesman.com/blogs/martha-gill/2012/06/science-its-girl-thing-says-eu-commission-holding-lipstick-and-bunsen-burn) (date accessed 22 August 2013).

29       Swain F. Science: It's a girl thing. Excuse me while I die inside. – SciencePunk.  
30       ScienceBlogs. 2012. [http://scienceblogs.com/sciencepunk/2012/06/22/science-its-a-](http://scienceblogs.com/sciencepunk/2012/06/22/science-its-a-girl-thing-excuse-me-while-i-die-inside/)  
31       [girl-thing-excuse-me-while-i-die-inside/](http://scienceblogs.com/sciencepunk/2012/06/22/science-its-a-girl-thing-excuse-me-while-i-die-inside/) (date accessed 22 August 2013)

32       Yong E. Edit-a-thon gets women scientists into Wikipedia. *Nature*. 2012.  
33       [http://www.nature.com/news/edit-a-thon-gets-women-scientists-into-wikipedia-](http://www.nature.com/news/edit-a-thon-gets-women-scientists-into-wikipedia-1.11636)  
34       [1.11636](http://www.nature.com/news/edit-a-thon-gets-women-scientists-into-wikipedia-1.11636) (date accessed 22 August 2013)

35       Donald A. Throw off the cloak of invisibility. *Nature*  
36       2012;**490**:447.<http://www.nature.com/news/throw-off-the-cloak-of-invisibility-1.11638>  
37       (date accessed 22 August 2013).

- 1  
2  
3 14 Head MG, Fitchett JR, Cooke MK, *et al.* UK investments in global infectious disease  
4 research 1997-2010: a case study. *The Lancet infectious diseases* Published Online  
5 First: 7 November 2012.  
6  
7 15 Fox MF. Gender, Family Characteristics, and Publication Productivity among  
8 Scientists. *Social Studies of Science* 2005;**35**:131–50.  
9  
10 16 Ceci SJ, Williams WM. Understanding current causes of women's  
11 underrepresentation in science. *Proceedings of the National Academy of Sciences of*  
12 *the United States of America* 2011;**108**:3157–62.  
13  
14 17 Moss-Racusin CA, Dovidio JF, Brescoll VL, *et al.* Science faculty's subtle gender  
15 biases favor male students. *Proceedings of the National Academy of Sciences of the*  
16 *United States of America* 2012;**109**:16474–9.  
17  
18 18 List of Registered Medical Practitioners - statistics. General Medical Council.  
19 [http://www.gmc-uk.org/doctors/register/search\\_stats.asp](http://www.gmc-uk.org/doctors/register/search_stats.asp) (date accessed 22 August  
20 2013).  
21  
22  
23  
24  
25  
26  
27  
28  
29  
30  
31  
32  
33  
34  
35  
36  
37  
38  
39  
40  
41  
42  
43  
44  
45  
46  
47  
48  
49  
50  
51  
52  
53  
54  
55  
56  
57  
58  
59  
60

1  
2  
3  
4  
5  
6  
7  
8  
9  
10  
11  
12  
13  
14  
15  
16  
17  
18  
19  
20  
21  
22  
23  
24  
25  
26  
27  
28  
29  
30  
31  
32  
33  
34  
35  
36  
37  
38  
39  
40  
41  
42  
43  
44  
45  
46  
47  
48  
49  
50  
51  
52  
53  
54  
55  
56  
57  
58  
59  
60

**~~Inequalities-Disparities~~ in research funding for women scientists: systematic analysis of UK investments in global infectious disease research 1997–2010**

Michael G Head<sup>a\*</sup>, Joseph R Fitchett<sup>b</sup>, Mary K Cooke<sup>a</sup>, Fatima B Wurie<sup>a</sup>, Rifat Atun<sup>c\*</sup>

a University College London, Research Department of Infection and Population Health, UCL Royal Free Campus, Rowland Hill Street, London, NW3 2PF

b London School of Hygiene & Tropical Medicine, Keppel Street, London, WC1E 7HT

c Imperial College London, South Kensington Campus, London SW7 2AZ and Harvard School of Public Health, Harvard University, Boston, USA~~Imperial College Business School and the Faculty of Medicine, Imperial College London, South Kensington Campus, London SW7 2AZ~~

\*Corresponding Author

Number of Words: **3 758**

**Keywords** – gender, funding, research, women, ~~inequality~~

## Abstract

Objectives: ~~Women are under-represented in biomedical science. Funding awarded to UK institutions for all infectious disease research from 1997 to 2010 was investigated, across disease categories and along the research and development continuum. There has not previously been a systematic analysis exploring gender disparities in awards for gender against research funding awards. Using an existing dataset, We investigated funding awards to UK institutions for all infectious disease research from 1997 to 2010—were investigated, across disease categories and along the research and development continuum. There was no attempt to investigate bias.~~

Design: Systematic analysis

Methods: Data ~~was~~ were obtained from several sources for ~~infectious disease research for awards from~~ the period 1997–2010 and each study assigned to - disease categories; type of science (pre-clinical, phases I, ~~II or~~ III trials, product development, implementation research); categories of funding organisation. Fold differences and statistical analysis were used to compare total investment, study numbers, mean grant, and median grant between men and women ~~according to disease system, specific infection and funding organisation.~~

Results: ~~325,922 studies were screened and~~ 6052 studies were included in the final analysis, comprising 4357 grants (72.0%) awarded to men and 1695 grants (28.0%) awarded to women, totalling £2.274 billion. Of this, men received £1.786 billion (78.5%) and women £488 million (21.5%). The median value of award was greater for men (£179 389; IQR £59 146–£371 977) than women (£125 556; IQR £30 982–£261 834).

Awards were greater for male PIs across all infectious disease systems, excepting neurological infections and sexually transmitted infections. The proportion of total funding awarded to women ranged from 14.3% in 1998 to 26.8% in 2009 (mean 21.4%); ~~and was~~

**Comment [MGH1]:** I think this sentence, although a tad irregular, is worth including in the abstract. Reinforces in the mind of the reader what the paper cannot do.

1  
2  
3  
4  
5  
6  
7  
8  
9  
10  
11  
12  
13  
14  
15  
16  
17  
18  
19  
20  
21  
22  
23  
24  
25  
26  
27  
28  
29  
30  
31  
32  
33  
34  
35  
36  
37  
38  
39  
40  
41  
42  
43  
44  
45  
46  
47  
48  
49  
50  
51  
52  
53  
54  
55  
56  
57  
58  
59  
60

lowest for pre-clinical research at 18.2% (£285.5 million of £1.573 billion) and highest for operational research at 30.9% (£151.4 million of £489.7 million).

Conclusions: There are ~~clear and~~ consistent disparities in funding received by men and women principal investigators. ~~Women~~ have fewer funded studies and receive less funding in absolute and in relative terms. ~~The~~ the median funding awarded ~~are lower for to~~ women ~~is lower~~ across most infectious disease areas, by funder, and type of science ~~funded along the R&D pipeline~~. These ~~se~~ disparities remain broadly unchanged over the 14-year study period.

Article summary

Article focus

- ~~Our aim was to~~ We investigate explore the distribution of funding across infectious disease research by the gender of principal investigator ~~and~~ to identify any disparities in funding received by men and women between genders researchers in the UK.

Key messages

- In There are ~~clear and~~ consistent disparities in funding received by men and women principal investigators in infectious disease research (PIs) funded in the UK.
- Total funding and the median award across most disease areas and type of science is typically greater in male PIs than female PIs
- ~~Worryingly, these~~ These disparities remain consistent over the time period of ~~our~~ analysis (1997-2010)

## Strengths and limitations of this study

- This is the first study to present detailed data and rigorously quantify on these funding disparities between men and women researchers in infectious disease research to such a great level of in the UK detail and quantifying the results with statistical analysis adds rigour.
- Our results provides new and additional evidence on disparities on funding for men and women researchers highlighted in earlier studies and add further evidence to previous work highlighting inequalities differences around gender, and can be used to enhance provides a case for the new research explain the source of these disparities, especially given government commitments debate on furthering the numbers and to increase the number of career paths of women in science
- ~~Weaknesses include being~~We were unable to assess the success and failure rates by gender and thus we cannot comment on true the extent of inequalities or bias.  
~~As and we also lacked~~could not access data on the academic ranking of principal investigators, we and were hence unable to adjust for levels of seniority across both genders.

1  
2  
3  
4  
5  
6  
7  
8  
9  
10  
11  
12  
13  
14  
15  
16  
17  
18  
19  
20  
21  
22  
23  
24  
25  
26  
27  
28  
29  
30  
31  
32  
33  
34  
35  
36  
37  
38  
39  
40  
41  
42  
43  
44  
45  
46  
47  
48  
49  
50  
51  
52  
53  
54  
55  
56  
57  
58  
59  
60

Introduction

Women are under-represented in biomedical science, ~~with a limited number of studies suggesting inequalities and discriminatory practices in the United Kingdom (UK), United States of America (US) and the European Union (EU) as a whole.~~

~~Yet,~~ few studies have systematically explored the extent and reasons for of the observed these inequalities disparities between men and women scientists ~~in relation to women in science.~~ Women make up comprise 50% of the EU student population and 45% of doctoral students, but only one third of career researchers are women – a figure that is lower for senior positions.[1]

~~In 1997 an analysis of the Swedish Medical Research Council suggested that peer-reviewers could not judge scientific merit independent of gender and noted the clear discrimination against women researchers.<sup>2</sup>~~

~~A number of UK studies have raised concerns on the position of women in biomedical science.~~ In 2001, a Wellcome Trust survey, concluded that although women were as successful as men in securing funding for biomedical research, they were less likely to apply for grant funds because of their status in scientific institutions and the level of support they received.[2] An analysis of Wellcome Trust awards in 2000-08 revealed a significant gender difference in the amount of funding awarded, even after adjusting for the seniority of the principal investigator, ~~with conclusion concluding~~ “the most likely explanation for the difference in amounts awarded to women and men is that women are systematically less ambitious in the amounts of funding requested in their grant applications.”[3] ~~Although, i~~ In 2011, around 44% of academics in UK universities were women, yet only 39% of senior lecturers and 19% of professors were women.[4] Furthermore,

A number of studies from the US have shown that women in science are disadvantaged compared to men.[5–7] ~~In 2012, a study which asked faculty from research-intensive US universities to rate equally qualified man and woman applicant for a laboratory manager, found that the male applicant was rated significantly more competent and employable by both male and female faculty.~~<sup>9</sup>

The low numbers of women in science and the reasons for this anomaly is a concern for scientists and policy makers. Although the UK Medical Research Council (MRC) has a gender equality scheme, which briefly states gender equality is reflected in agreements with research organisations receiving MRC funding, it is not clear how ~~this the~~ scheme is implemented.[8]

While ~~a number of several~~ initiatives have aimed to increase the numbers of women involved in science, there are no affirmative actions or binding policies in the UK or Europe to definitively ensure women are better represented in science. Indeed, some initiatives aimed at increasing women in science have been criticised. For example, in 2012, the European Commission campaign targeting 13-18 year-old secondary school students[9] was widely criticised-rebuked and described as an insult to women in science-[10][11], with The the offending video clip was removed from the EU campaign website. The effects of campaigns attempting-aimed at to-raiseing the profile of women in science[12,13] have not been assessed.

We havepreviously previously undertaken a carried-out-an analysis tracking investments in infectious disease research whereby we have systematically analysed analysis of research funding awarded to UK institutions for all infectious disease research, for the 14-year period

Formatted: Tab stops: 2.72", Left

1  
2  
3  
4  
5  
6  
7  
8  
9  
10  
11  
12  
13  
14  
15  
16  
17  
18  
19  
20  
21  
22  
23  
24  
25  
26  
27  
28  
29  
30  
31  
32  
33  
34  
35  
36  
37  
38  
39  
40  
41  
42  
43  
44  
45  
46  
47  
48  
49  
50  
51  
52  
53  
54  
55  
56  
57  
58  
59  
60

from 1997 to 2010.[14] ~~In this study~~Here, we ~~use information from this the dataset gathered for this earlier study and to~~ examine with trends over time the distribution of funding awarded to men and women principal investigators (PIs) across specific infections, ~~in investigation funder~~ categories, and along the research and development (R&D) continuum, extending from pre-clinical to clinical and operational research.

**Methods**

We obtained data from several sources for infectious disease research studies where funding was awarded between 1997 and 2010. ~~The methods for the original study are elaborated in detail elsewhere.~~[14] ~~and in summarised here.~~ We ~~–We~~ identified 325,922 studies for screening ~~that covered all areas of disease from several funders, and filtered these according to our primary interest of to identify funding for being related to infectious diseases where the lead institution was in the UK in the period, and plus the year of award {1997-2010.~~ We obtained data from publicly available sources and directly from the funders. ~~and the lead institution being in the UK.~~ We assigned each study to primary disease categories. We briefly outline the methodology for the categorisation of disease areas and classification of the funding sources, elaborated in detail elsewhere.<sup>16</sup> ~~No open accessWe did not include private sector funding was included in the original analysis, as this data was clearly under representative of the pharmaceutical sector data were not publicly available as a whole.~~ Figure 1 shows the sources of data ~~(the databases searched and where funders provided us with information directly)~~ and the numbers of studies ~~included and excluded~~ at each stage of screening to reach the final set of studies for detailed analysis.

Figure 1. Methodology flow chart ~~for filtering studies firstly by infectious disease and then by gender~~

1  
2  
3  
4  
5  
6  
7  
8  
9 Data collection and cleaning took place alongside routine duties between 2006 and 2011,  
10 primarily by MGH and assisted by JRF, MKC and FBW. Funding records could feasibly be  
11 obtained going back to 1997, hence the decision to cover awards during 1997-2010. We  
12 assigned each study to primary disease categories, and ~~W~~within each category, we  
13  
14 documented topic-specific subsections, including specific pathogen or disease. We allocated  
15  
16 studies to one of four categories along the R&D continuum: pre-clinical; phases I, II or III;  
17  
18 product development; and operational research, and to one of the 26 categories for funding  
19  
20 organisations.  
21  
22

23  
24  
25 Where the PI was named, we assigned them to men or women categories. The studies  
26  
27 where only an initial was available for the forename were assigned as “unclear” if we were  
28  
29 unable to establish the PIs gender from a review of the literature, institutional websites or  
30  
31 ~~and~~ publicly available publications and documents.  
32  
33

34  
35 Reference to sexually transmitted infections excludes HIV. Neglected tropical diseases were  
36  
37 categorised according to classification used by the World Health Organization (WHO)  
38  
39 ([http://www.who.int/neglected\\_diseases/diseases/en](http://www.who.int/neglected_diseases/diseases/en)). Antimicrobial resistance includes  
40  
41 antibacterial, antiviral, antifungal and antiparasitic studies. ~~No private sector funding was~~  
42  
43 ~~included in this analysis due to limited publicly available data.~~  
44  
45

46  
47 We converted grants awarded in a currency other than pounds sterling to UK pounds using  
48  
49 the mean exchange rate in the year of the award. We adjusted grant funding amounts for  
50  
51 inflation and reported in 2010 UK pounds.  
52  
53  
54  
55  
56  
57  
58  
59  
60

1  
2  
3  
4  
5  
6  
7  
8  
9  
10  
11  
12  
13  
14  
15  
16  
17  
18  
19  
20  
21  
22  
23  
24  
25  
26  
27  
28  
29  
30  
31  
32  
33  
34  
35  
36  
37  
38  
39  
40  
41  
42  
43  
44  
45  
46  
47  
48  
49  
50  
51  
52  
53  
54  
55  
56  
57  
58  
59  
60

~~We~~ As well as ~~exclud~~~~ing~~ studies not immediately relevant to infection, ~~we further~~  
~~exclusions in the original study included~~~~excluded~~ unfunded studies, veterinary infectious  
disease research studies (unless there was a zoonotic component), those exploring the use  
of viral vectors to investigate non-communicable diseases, grants for symposia or meetings,  
or studies with UK contributions (e.g. as a collaborator), but the funding was awarded to a  
non-UK institution. ~~Unfunded studies were excluded.~~

We used Microsoft Excel versions 2000 and 2007 to categorise studies. Where needed, data  
were exported into Microsoft Access (versions 2000 and 2007) and specific keyword queries  
used to select precise sections of the data for analysis. We used Stata (version 11.0) for  
statistical analysis and to generate figures.

We used fold differences to compare total investment, number of studies, mean grant, and  
median grant between men and women according to disease system, specific infection and  
funding organisation.

We used nonparametric Mann-Whitney rank-sum test to assess the distribution of funding by  
gender. Nonparametric K-sample test on equality of medians was applied to compare the  
median funding by gender, and reported as a chi-squared statistic without Yates' correction  
for continuity. Nonparametric Wilcoxon signed-rank test was applied when comparing  
matched data, such as time trends by gender. The significance for all tests was defined at  
the 5% level (two-sided  $P=0.05$ ).

~~We present disparities between gender and do not attempt to investigate or imply bias or~~  
~~inequalities as we could not access data on unsuccessful grant applications.~~

## Results

We identified 6165 studies from the 325,922 studies screened that were suitable for inclusion in our analysis. Of these, we were unable to ascertain the gender of principal investigator for 30 studies (0.5%). We excluded 83 studies (1.3%) that did not specify the PIs name or gender – these were funded by the Bill and Melinda Gates Foundation (Gates Foundation) (38 studies; 0.6%) and the UK Department for International Development (DFID) (22 studies; 0.4%), accounting for £321.2 million (12.3% of the total) ~~that did not specify the PIs name or gender~~. We included 6052 studies in the final analysis, comprising 4357 grants (72.0%) awarded to men and 1695 grants (28.0%) awarded to women, totalling £2.274 billion, of which – Of this, £1.786 billion (78.5%) were awarded to men and £488 million (21.5%) awarded to women.

The median value of grant funding was greater for men (£179 389; IQR £59146–£371 977) than for women (£125 556; IQR £30 982–£261 834). Similarly, mean value of the grant funding was greater for men (£409 910; SD £840 087) than for women (£288 011; SD £704 474). Figure 2 shows the distribution of the total investments and median funding awarded to PIs by gender over time.

*Figure 2a. Total investment over time awarded to male and female principal investigators*

*Figure 2b Median investment over time awarded to male and female principal investigators*

## Infectious disease system

Table 1A (web appendix 1) shows the total investment, total numbers of studies, mean grant funding, median grant funding and fold differences in funding according to 9 disease

1  
2  
3  
4  
5  
6  
7  
8  
9  
10  
11  
12  
13  
14  
15  
16  
17  
18  
19  
20  
21  
22  
23  
24  
25  
26  
27  
28  
29  
30  
31  
32  
33  
34  
35  
36  
37  
38  
39  
40  
41  
42  
43  
44  
45  
46  
47  
48  
49  
50  
51  
52  
53  
54  
55  
56  
57  
58  
59  
60

systems and by gender of PI. We identified no infectious disease system where women led the majority of research efforts or were awarded the majority of funding. Median funding awards were greater for male PIs across all infectious disease systems, with the exception of neurological infections and sexually transmitted infections.

Greatest levels of funding awarded to men and to women were for research into respiratory infections and HIV. Men received a total of £312.1 million for research into respiratory infections compared with £84.4 million for women, a 3.70 fold difference, and a total of £290.8 million for HIV research compared with £79.7 million for women, a 3.65 fold difference.

The largest difference between total funding for men and for women were was with gastrointestinal infections (5.65 fold difference) where women received only 15.0% of the total investment (£37.0 million) and spearheaded 18.9% (149) of the studies and neurological infections (4.22 fold difference). Smallest difference between total funding for men and for women were was with in research into sexually transmitted infections (1.90 fold difference), where women received 35.0% (£45.4 million) of the total funding, and spearheaded led 49.0% (182) of the studies.

Mean funding for grants were was significantly greater for men (£409 910; SD £840 087) than for women (£288 011; SD £704 474). The differences in median funding were statistically significant ( $P > 0.01$ ) for gastrointestinal infections (men £328 021; SD £458 720) (women £248 615; SD £433 176), for haematological infections (men £417 889; SD £914 626) (women £306 126; SD £819 910), and for HIV (men £649 216; SD £1 550 920) (women £278 505; SD £545 657).

Median funding for grants showed a similar pattern, with significantly greater grant funding for men (£179 389; IQR £59 146–£371 977) than women (£125 556; IQR £30 983–£261 835). Differences in median funding were statistically significant ( $P > 0.05$ ) for gastrointestinal infections (men £208 369; IQR £78 852–£357 771) (women £155 066; IQR £43 637–£305 928), for hepatic infections (men £118 638; IQR £41 342–£269 629) (women £68 620; IQR £26 720–£221 952), and for HIV (men £163 462; IQR £39 153–£511 800) (women £114 272; IQR £29 880–£305 339).

### ***Specific Infections***

Table 1B (web appendix 1) shows total investment, total numbers of studies, mean grant funding, median grant funding and fold differences in funding according to specific infection by gender.

Men received significantly higher levels of total research funding, spearheaded greater numbers of studies, and were awarded greater median and mean funding for grants for malaria ( $P = 0.01$ ), HIV ( $P = 0.01$ ) and influenza ( $P = 0.04$ ).

Major differences between total funding for men and for women were with observed for research into candida (47.75 fold difference), rotavirus (33.65 fold difference), campylobacter (24.33 fold difference) and norovirus (23.33 fold difference). Smallest differences between total funding for men and women were for research into dengue (1.07 fold difference) and leishmaniasis (1.55 fold difference). Women received greater total funding than men for research into leprosy (0.09 fold difference), diphtheria (0.18 fold difference), chlamydia (0.36 fold difference), syphilis (0.37 fold difference), and varicella zoster (0.54 fold difference).

1  
2  
3  
4  
5  
6  
7  
8  
9  
10  
11  
12  
13  
14  
15  
16  
17  
18  
19  
20  
21  
22  
23  
24  
25  
26  
27  
28  
29  
30  
31  
32  
33  
34  
35  
36  
37  
38  
39  
40  
41  
42  
43  
44  
45  
46  
47  
48  
49  
50  
51  
52  
53  
54  
55  
56  
57  
58  
59  
60

Differences in mean grant funding ~~was~~were statistically significant ( $P > 0.05$ ) for malaria research (men £590 422; SD £1 324 909) (women £318 054; SD £726 872), for influenza (men £616 643; SD £881 493) (women £387 186; SD £489 997), for respiratory syncytial virus (men £485 283; SD £539 396) (women £187 931; SD £268 412), and for HIV (men £649 216; SD £1 550 920) (women £278 505; SD £545 657).

Differences in median grant funding were statistically significant ( $P > 0.05$ ) for malaria research (men £209 646; IQR £63 826–£529 610) (women £143 358; IQR £42 754–£314 524), for hepatitis C (men £124 797; IQR £42 475–£289 293) (women £67 265; IQR £29 880–£233 467), for influenza (men £348 730; IQR £213 601–£668 561) (women £200 787; IQR £124 210–£398 191), for herpes simplex virus (men £119 295; IQR £40 009–£446 395) (women £309 610; IQR £147 885–£439 305), and for HIV (men £163 462; IQR £39 153–£511 800) (women £114 272; IQR £29 880–£305 339).

Figure 3 shows the proportion of total funding awarded to principal investigators by gender over time and a breakdown of investment by research pipeline. The proportion of the total funding awarded to women ranged from ~~a low of~~14.3% (in 1998) to ~~a high of~~26.8% (in 2009), with a mean proportion of 21.4% for the period studied. The proportion of funding was lowest for pre-clinical research at 18.2% (£285.5 million of £1.573 billion total) and highest for operational research at 30.9% (£151.4 million of £489.7 million). The funding for clinical (Phase I, II and III) research was 29.9% (£25.5 of £85.2) and for product development amounted to 20.4% (£25.8 million of £126.6 million).

*Figure 3a. Proportion of investment over time awarded to male and female principal investigators*

Figure 3b. Total investment by research pipeline awarded to male and female principal investigators

### Funding organisation

Table 2 (web appendix 2) shows in detail the total investment, total numbers of studies, mean grant funding, median grant funding and fold differences in funding according to funding organisation and by gender.

Public funding organisations invested a total of £1.025 billion in research led by men (78.6%) and £279.8 in research led by women (21.4%). Greatest levels of funding awarded to men and to women were by the Wellcome Trust and the UK MRC. Major differences between funding awarded to men and to women PIs were by the BBSRC, with a 6.12 fold difference. Smallest differences between funding awarded to men and to women were by the UK Government funding streams such as the National Institute for Health Research, with a 1.66 fold difference. Mean grant funding from public funding organisations were significantly greater for men at £595 361 (SD £1 080 718) than for women at £448 414 (SD £814 979). Differences were also statistically significant ( $P > 0.01$ ) for UK MRC grants with men at £751 413 (SD £1 020 748) and women at £544 427 (SD £884 442), and for UK Government grants with men at £208 828 (SD £492 519) and women at £182 907 (SD £619 889).

Median grant funding from public funding organisations had a similar pattern with significantly greater grant funding for men at £272 452 (IQR £138 322–£572 529) and women at £213 718 (IQR £92 880–£402 917). Differences were also statistically significant ( $P > 0.05$ ) for UK MRC grants with men at £404 615 (IQR £210 068–£811 860) and women

1  
2  
3  
4  
5  
6  
7  
8  
9  
10  
11  
12  
13  
14  
15  
16  
17  
18  
19  
20  
21  
22  
23  
24  
25  
26  
27  
28  
29  
30  
31  
32  
33  
34  
35  
36  
37  
38  
39  
40  
41  
42  
43  
44  
45  
46  
47  
48  
49  
50  
51  
52  
53  
54  
55  
56  
57  
58  
59  
60

at £286 679 (£178 182–£468 998), and for UK Government grants with men at £129 660 (IQR £23 761–£207 320) and women at £59 976 (IQR £12 564–£157 053).

Philanthropic funding organisations invested a total of £691.7 million in research led by men (78.8%) and £185.9 million in research led by women (21.2%).

Mean grant funding from philanthropic funding organisations were significantly greater for men at £338 396 (SD £695 025) than for women at £242 014 (SD £711 420). Differences were also statistically significant ( $P > 0.01$ ) for Wellcome Trust grants with men receiving £393 652 (SD £723 549) and women £230 168 (SD £362 836), and for other charitable funding organisations with men receiving £211 190 (SD £454 108) and women £271 842 (SD £1 208 852).

Median grants from philanthropic funding organisations showed a similar pattern with significantly greater grant funding for men at £153 653 (IQR £58 589 – £302 774) and women at £114 173 (IQR £42 658 – £222 842). Differences were also statistically significant ( $P > 0.05$ ) for Wellcome Trust grants with men receiving £191 461 (IQR £74 759 – £362 424) and women £137 241 (IQR £54 019 – £250 723), and for other charitable funding organisations with men receiving £91 991 (IQR £36 429 – £172 497) and women £76 058 (IQR £17 279 – £150 727).

Figure 4 shows the association between funding organisation and total investment and median funding by gender. The MRC awarded the highest median amount in grants to women (£286 679; IQR £178 182–£468 998), but the median funding amount in grants for men were 1.41 fold higher than that awarded to women (£404 615; IQR £210 068–£811 860). European Commission awarded the highest mean grants to women at £923 364 (SD

£1 316 016) however mean funding amount in grants for men were 1.44 fold higher at £1325 149 (SD £2 409 860) than that for women.

*Figure 4a. Association between funding organisation and total investment by gender*

*Figure 4b. Association between funding organisation and median award by gender*

#### *Time trend*

Table 3 (web appendix 3) shows in detail the trends in funding over time from 1997 to 2010 by gender of principal investigators, with amounts and relative proportions each year of funding. Mean annual funding received was greater by men at £127.6 million (SD £48.7 million) than women at £34.9 million (SD £13.4 million). Proportions of annual funding received by men ranged from 73.2% to 85.7%, with a mean of 78.6%.

Proportions of annual funding received by women ranged from 14.3% to 26.8% with a mean of 21.4%. The largest annual funding received by men was £245.7 million in 2000, and the smallest at £64.2 million in 1997. The largest annual funding received by women was £59.6 million in 2002, with the smallest at £13.1 million in 1998.

Over the 14-year study period, the proportion of investment awarded to women each year remains relatively unchanged with a mean of 21.4% of total (range 14.3%–26.8%; £13.1 million to £59.6 million). Figure 5 shows the funding trends over time and fold differences in total investments by gender. Absolute difference in the funding amounts in the grants awarded to men and women ranges between £47.9 million and £190.1 million, with a mean difference of £92.7 million (SD £38.3 million). Fold difference in grant funding for men and women ranged from 2.74 to 5.97, with a mean fold difference of 3.66.

*Figure 5a. Total investment and trend over time, by gender*

1  
2  
3  
4  
5  
6  
7  
8  
9  
10  
11  
12  
13  
14  
15  
16  
17  
18  
19  
20  
21  
22  
23  
24  
25  
26  
27  
28  
29  
30  
31  
32  
33  
34  
35  
36  
37  
38  
39  
40  
41  
42  
43  
44  
45  
46  
47  
48  
49  
50  
51  
52  
53  
54  
55  
56  
57  
58  
59  
60

Figure 5b. Fold difference of investment over time, by gender

**Discussion**

We present the first, detailed and systematic analysis [by gender](#) of ~~the~~ investments in infectious disease research [in the UK by gender](#) for the 14-year period 1997-2010. We identified 6165 studies funded by public and philanthropic funding organisations, with total research investment of £2.6 billion.

We ~~quantify~~ [quantified](#) the differences in research funding awarded by gender, to show these to be substantial. The analysis shows clear and consistent disparities between men and women principal investigators, with lower funding in terms of the total investment, the number of funded studies, the median funding awarded and the mean funding awarded across most of the infectious disease areas funded. ~~The analysis reveals consistent disparities, with W~~ women ~~receiving~~ [received](#) less funding in absolute amounts and in relative terms, by funder and the type of science funded along the R&D pipeline. ~~Analysis of the funding trends by year reveals that the~~ [These](#) disparities [in funding between men and women](#) persist over time.

We show large disparities in median funding amounts for men and women researchers in investments by the European Commission and the MRC. Such differences were much less apparent when comparing funding from the Department of Health and BBSRC, although the BBSRC awarded 86% of funding to men. The BBSRC almost entirely funds pre-clinical research,[14] and this matches the increased proportions of pre-clinical studies being led by male principal investigators.

Our findings [in infectious disease research](#), the most detailed to date, provide new evidence ~~to show that there are on~~ [disparities between men and](#) women ~~reserachers in leading studies in infectious disease research, to reinforce science working in the area of infectious disease research are clearly disadvantaged. Our findings confirm~~ the concerns raised ~~in the published in earlier studies literature on the subject~~. [4,15,16]<sup>4,9,15,17</sup> Disparities that are more marked at senior levels of academia need to be investigated to explain and account for the observed differences.

Field Code Changed

The ~~precise~~ reasons why the median awards across most infectious disease conditions should be significantly less for women principal investigators cannot be deduced from the available data. The next step may be to investigate success rates by gender to assess how many women are applying, [and what proportion of the initial request for funding is actually allocated](#).

~~Some studies have suggested~~ [There have been suggestions](#) that women ~~were are~~ systematically less ambitious in the amounts of funding requested in their grant applications when compared with men who are equivalently ranked academically, and that relatively simple mentoring programmes could at least partially overcomes this anomaly.[3] However, there is no evidence supporting the ~~se~~ assertions. Others have suggested that systems which ensure PI anonymity during review of grant funding submissions may help reduce [the presence of any](#) subtle gender biases[17], though in practice this approach would be challenging as the experience of the PI is a key factor when considering suitability of request for research support. However, evidence on effective interventions to address barriers for women scientists are lacking.[16] Women of child-bearing age are being disadvantaged in some areas of employment, even though in relation to scientific endeavour, productivity as measured by published outputs is not significantly different between women with and without children.[15]

1  
2  
3  
4  
5  
6  
7  
8  
9  
10  
11  
12  
13  
14  
15  
16  
17  
18  
19  
20  
21  
22  
23  
24  
25  
26  
27  
28  
29  
30  
31  
32  
33  
34  
35  
36  
37  
38  
39  
40  
41  
42  
43  
44  
45  
46  
47  
48  
49  
50  
51  
52  
53  
54  
55  
56  
57  
58  
59  
60

*Study limitations*

Our analysis has several limitations. We rely on the accuracy of the original data from the funding organisations and as described elsewhere we have excluded data from ~~industry~~the private sector as the publicly available data are incomplete.[14]

In the period analysed, we were not able to find data on the number of men and women PIs requesting financial support for research agencies from the funding sources studies. Hence, we were unable to assess the success and failure rates by gender. We also did not have complete data on the amount of funding initially requested, the gender of co-applicants for each study, the total pool of researchers in each disease area and within each type of science, or ~~on~~ the proportion of awards made to clinical and non-clinical researchers, all of which would be useful pieces of information in building up ~~developing~~ a clearer picture of the reasons for the presented differences. The proportion of doctors registered in the UK favours men (56.8% ~~as~~ of January 2013) over women,[18] but the proportion of those carrying out research appears to be unknown. Understanding the distribution of researchers is critical to understanding the research landscape.

We lacked data on the academic ranking of principal investigators and were hence unable to adjust for levels of seniority across both genders. We were unable to get data on gender from the Gates Foundation and DFID and hence were unable to clarify the gender of a small proportion of investigators, though we believe ~~these~~this ~~limitations~~ ~~are~~is not likely to change the conclusions of the study. Our analysis focuses solely on infectious disease research, and similarly analysis of exploring other areas of scientific research would be interesting to see be needed if these disparities persisted for all research areas.-

## Conclusions

Notwithstanding ~~these~~ limitations, our ~~study provides a~~ systematic analysis ~~shows of the~~ unequal distribution of investments in infectious disease research ~~by gender. We~~ ~~demonstrate that in the UK there are clear and unacceptable disparities in the number of for~~ ~~men and women. There are fewer~~ women ~~receiving funding at the~~ ~~level of~~ principal investigators in infectious disease research, ~~with fewer studies funded with lower funding~~ ~~amounts when successful.~~

Although earlier studies have discussed possible solutions, including mentoring programmes and advertising campaigns, none have systematically explored the reasons why such ~~inequalities differences~~ persist. Hence, without an understanding of the reasons for the observed ~~inequalities disparities~~, the proposed solutions are not very meaningful. ~~Research~~ ~~is needed to elucidate an understanding of the factors that can explain the observed~~ ~~disparities.~~

There is no evidence that women and men researchers are not equally able, hence, other factors are likely to be at play to explain the ~~observed unacceptable~~ disparities ~~in research~~ ~~funding between men and women~~, which have persisted over the 14-year study period. ~~Research is needed to elucidate an understanding of the factors that can explain the~~ ~~observed disparities.~~ We strongly urge policy makers, funders and scientists to urgently investigate the factors leading to the observed disparities and develop policies developed to address them, in order to ensure that, ~~as in all walks of life,~~ women are appropriately supported ~~and equally valued~~ in scientific endeavour.

## Funding

1  
2  
3  
4  
5  
6  
7  
8  
9  
10  
11  
12  
13  
14  
15  
16  
17  
18  
19  
20  
21  
22  
23  
24  
25  
26  
27  
28  
29  
30  
31  
32  
33  
34  
35  
36  
37  
38  
39  
40  
41  
42  
43  
44  
45  
46  
47  
48  
49  
50  
51  
52  
53  
54  
55  
56  
57  
58  
59  
60

This research received no specific grant from any funding agency in the public, commercial or not-for-profit sectors

**Author contribution**

MGH designed the study with input from RA and JF and collated the dataset. JRF, FW and MKC checked and refined the dataset. JRF undertook data analysis and created the graphs and figures with input from MGH and RA. MGH, JRF, and RA interpreted the data and wrote the first draft. MGH, JRF, and RA refined the analysis and paper with input from MKC and FBW. All authors reviewed and approved the final version. RA-MH is guarantor of the paper.

**Competing interests**

RA has received research funding from the UK Medical Research Council, the UK National Institute for Health Research, UK CRC, UK EPSRC, the UK Department for International Development and the UK Department of Health. RA is a member of the UL Medical Research Council Global Health Group. MGH works for the Infectious Disease Research Network, which has supported this work and is funded by the UK Department of Health. JRF has received funds from the Wellcome Trust and is a steering group member for the Infectious Disease Research Network. MKC has received funding from the Medical Research Council and the Bill & Melinda Gates Foundation. FBW has received funds from UCLH Charitable Foundation.

**Acknowledgements**

We thank Jennifer Harris and Raidah Haider for their input and assistance, and acknowledge the assistance of the research and development funding agencies for provision of data.

**Data-sharing statement**

1  
2  
3  
4  
5  
6 All gender data is available with this submission. Further data relating to the Research  
7  
8 Investments project can be found at [www.researchinvestments.org](http://www.researchinvestments.org) or by contacting the  
9  
10 corresponding author.  
11  
12  
13  
14  
15  
16  
17  
18  
19  
20  
21  
22  
23  
24  
25  
26  
27  
28  
29  
30  
31  
32  
33  
34  
35  
36  
37  
38  
39  
40  
41  
42  
43  
44  
45  
46  
47  
48  
49  
50  
51  
52  
53  
54  
55  
56  
57  
58  
59  
60

1  
2  
3  
4  
5  
6  
7  
8  
9  
10  
11  
12  
13  
14  
15  
16  
17  
18  
19  
20  
21  
22  
23  
24  
25  
26  
27  
28  
29  
30  
31  
32  
33  
34  
35  
36  
37  
38  
39  
40  
41  
42  
43  
44  
45  
46  
47  
48  
49  
50  
51  
52  
53  
54  
55  
56  
57  
58  
59  
60

References

1 More women in senior positions. Key to economic stability and growth. European Commission, Luxembourg: 2010.

2 Blake M, La Valle I. Who applies for research funding? Key factors shaping funding application behaviour among women and men in British higher education institutions. London: 2000.

3 Bedi G, Van Dam NT, Munafo M. Gender inequality in awarded research grants. *Lancet* 2012;**380**:474.[http://www.thelancet.com/journals/a/article/PIIS0140-6736\(12\)61292-6/fulltext](http://www.thelancet.com/journals/a/article/PIIS0140-6736(12)61292-6/fulltext) (accessed 29 Nov2012).

4 Fitzpatrick S. A Survey of Staffing Levels of Medical Clinical Academics in UK Medical Schools as at 31 July 2011. London: 2012. [http://www.medschools.ac.uk/Publications/Documents/MS\\_Clinical\\_Academic\\_Staff\\_Survey\\_310711.pdf](http://www.medschools.ac.uk/Publications/Documents/MS_Clinical_Academic_Staff_Survey_310711.pdf)

5 Burrelli J. Thirty-Three Years of Women in S&E Faculty Positions - US National Science Foundation. Arlington: 2008. <http://www.nsf.gov/statistics/infbrief/nsf08308/>

6 Lincoln AE, Pincus SH, Leboy PS. Scholars' awards go mainly to men. *Nature* 2011;**469**:472.<http://www.ncbi.nlm.nih.gov/pubmed/21270876> (accessed 25 Jan2013).

7 Pohlhaus JR, Jiang H, Sutton J. Sex differences in career development awardees' subsequent grant attainment. *Annals of internal medicine* 2010;**152**:616–7; author reply 617.<http://www.ncbi.nlm.nih.gov/pubmed/20439584> (accessed 25 Jan2013).

8 Medical Research Council. MRC Gender Equality Scheme. 2007.<http://www.mrc.ac.uk/Utilities/Documentrecord/index.htm?d=MRC003655> (accessed 21 Dec2012).

9 European Commission. About this site- Science: It's a girl thing! 2012.<http://science-girl-thing.eu/en/about-this-site> (accessed 29 Nov2012).

10 Gill M. "Science, it's a girl thing!" says EU Commission, holding lipstick and bunsen burner. *New Statesman*. 2012.<http://www.newstatesman.com/blogs/martha-gill/2012/06/science-its-girl-thing-says-eu-commission-holding-lipstick-and-bunsen-burn> (accessed 29 Nov2012).

11 Swain F. Science: It's a girl thing. Excuse me while I die inside. – SciencePunk. ScienceBlogs. 2012.<http://scienceblogs.com/sciencepunk/2012/06/22/science-its-a-girl-thing-excuse-me-while-i-die-inside/> (accessed 29 Nov2012).

12 Yong E. Edit-a-thon gets women scientists into Wikipedia. *Nature*. 2012.<http://www.nature.com/news/edit-a-thon-gets-women-scientists-into-wikipedia-1.11636> (accessed 29 Nov2012).

13 Donald A. Throw off the cloak of invisibility. *Nature* 2012;**490**:447.<http://www.nature.com/news/throw-off-the-cloak-of-invisibility-1.11638> (accessed 29 Nov2012).

- 1  
2  
3  
4  
5  
6  
7 14 Head MG, Fitchett JR, Cooke MK, *et al.* UK investments in global infectious disease  
8 research 1997-2010: a case study. *The Lancet infectious diseases* Published Online  
9 First: 7 November 2012. [http://www.thelancet.com/journals/a/article/PIIS1473-](http://www.thelancet.com/journals/a/article/PIIS1473-3099(12)70261-X/fulltext)  
10 [3099\(12\)70261-X/fulltext](http://www.thelancet.com/journals/a/article/PIIS1473-3099(12)70261-X/fulltext) (accessed 17 Nov2012).
- 11 15 Fox MF. Gender, Family Characteristics, and Publication Productivity among  
12 Scientists. *Social Studies of Science* 2005;**35**:131–  
13 50. <http://sss.sagepub.com/content/35/1/131.short> (accessed 29 Nov2012).
- 14 16 Ceci SJ, Williams WM. Understanding current causes of women's  
15 underrepresentation in science. *Proceedings of the National Academy of Sciences of*  
16 *the United States of America* 2011;**108**:3157–  
17 62. <http://www.pnas.org/content/early/2011/02/02/1014871108> (accessed 1 Nov2012).
- 18 17 Moss-Racusin CA, Dovidio JF, Brescoll VL, *et al.* Science faculty's subtle gender  
19 biases favor male students. *Proceedings of the National Academy of Sciences of the*  
20 *United States of America* 2012;**109**:16474–  
21 9. [http://www.pubmedcentral.nih.gov/articlerender.fcgi?artid=3478626&tool=pmcentrez](http://www.pubmedcentral.nih.gov/articlerender.fcgi?artid=3478626&tool=pmcentrez&rendertype=abstract)  
22 [&rendertype=abstract](http://www.pubmedcentral.nih.gov/articlerender.fcgi?artid=3478626&tool=pmcentrez&rendertype=abstract) (accessed 25 Oct2012).
- 23 18 List of Registered Medical Practitioners - statistics. General Medical Council.  
24 [http://www.gmc-uk.org/doctors/register/search\\_stats.asp](http://www.gmc-uk.org/doctors/register/search_stats.asp) (accessed 26 Jan2013).
- 25  
26  
27  
28  
29  
30  
31  
32  
33  
34  
35  
36  
37  
38  
39  
40  
41  
42  
43  
44  
45  
46  
47  
48  
49  
50  
51  
52  
53  
54  
55  
56  
57  
58  
59  
60

1  
2  
3  
4  
5  
6  
7  
8  
9  
10  
11  
12  
13  
14  
15  
16  
17  
18  
19  
20  
21  
22  
23  
24  
25  
26  
27  
28  
29  
30  
31  
32  
33  
34  
35  
36  
37  
38  
39  
40  
41  
42  
43  
44  
45  
46  
47  
48  
49  
50  
51  
52  
53  
54  
55  
56  
57  
58  
59  
60





Figure 2a. Total investment over time awarded to male and female principal investigators  
329x239mm (72 x 72 DPI)



Figure 2b Median investment over time awarded to male and female principal investigators  
329x239mm (72 x 72 DPI)



Figure 3a. Proportion of investment over time awarded to male and female principal investigators  
329x239mm (72 x 72 DPI)

1  
2  
3  
4  
5  
6  
7  
8  
9  
10  
11  
12  
13  
14  
15  
16  
17  
18  
19  
20  
21  
22  
23  
24  
25  
26  
27  
28  
29  
30  
31  
32  
33  
34  
35  
36  
37  
38  
39  
40  
41  
42

Operational research

Product development

Phase 1, 2, 3 trials

Preclinical

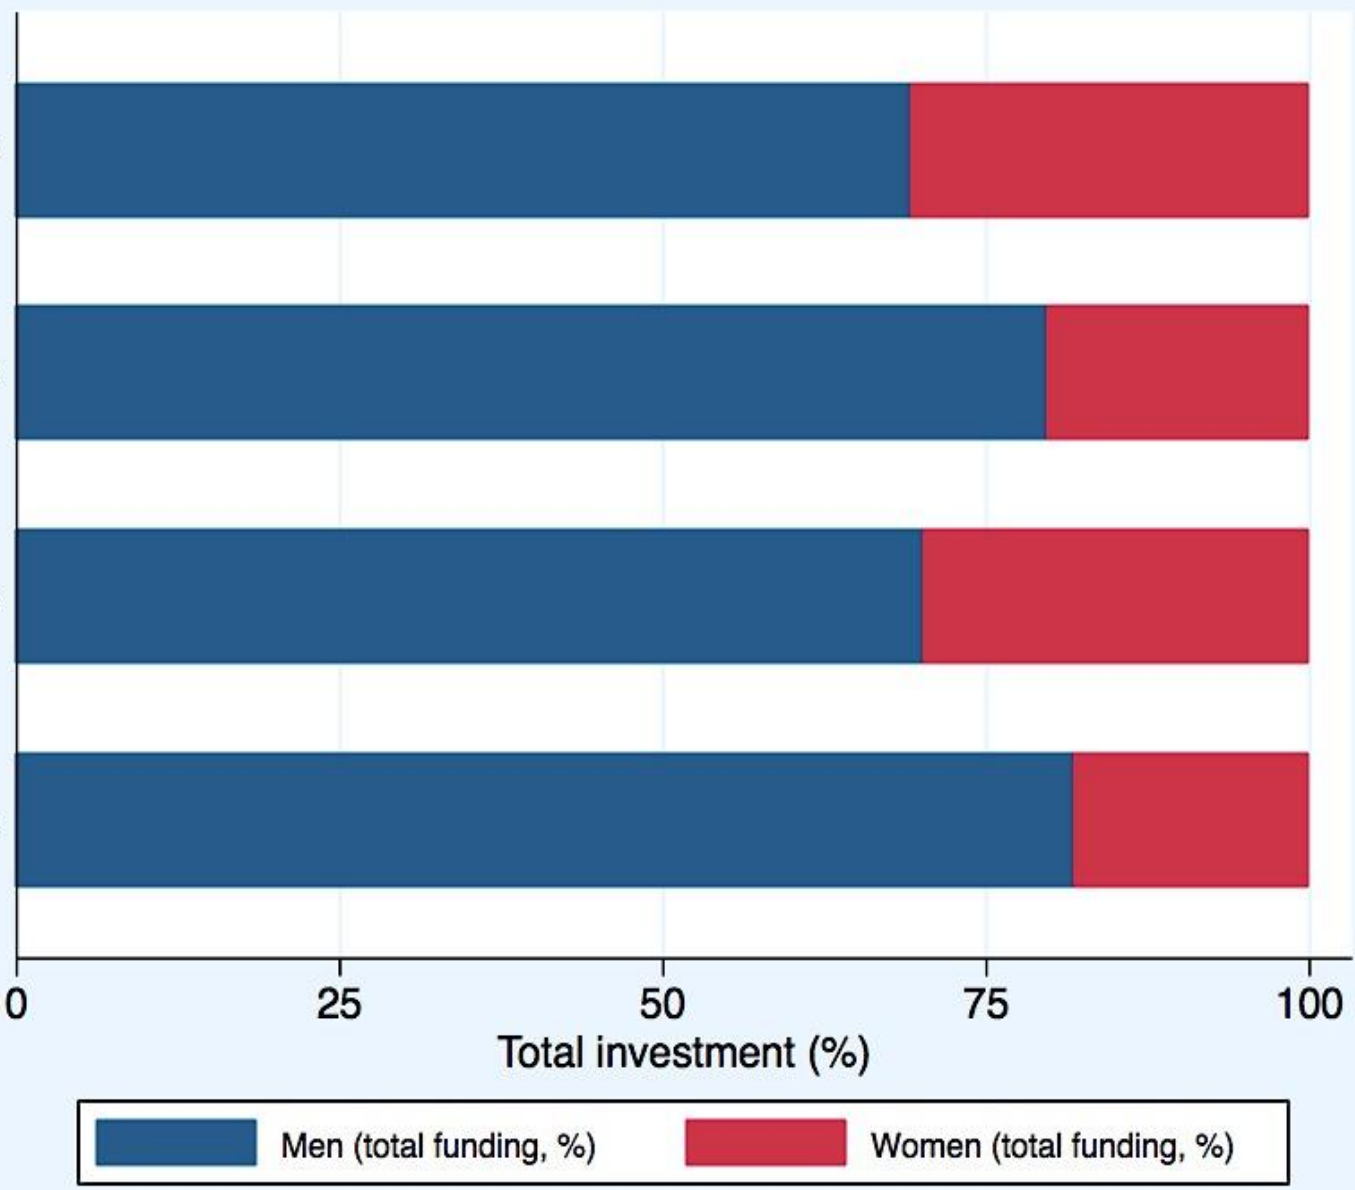

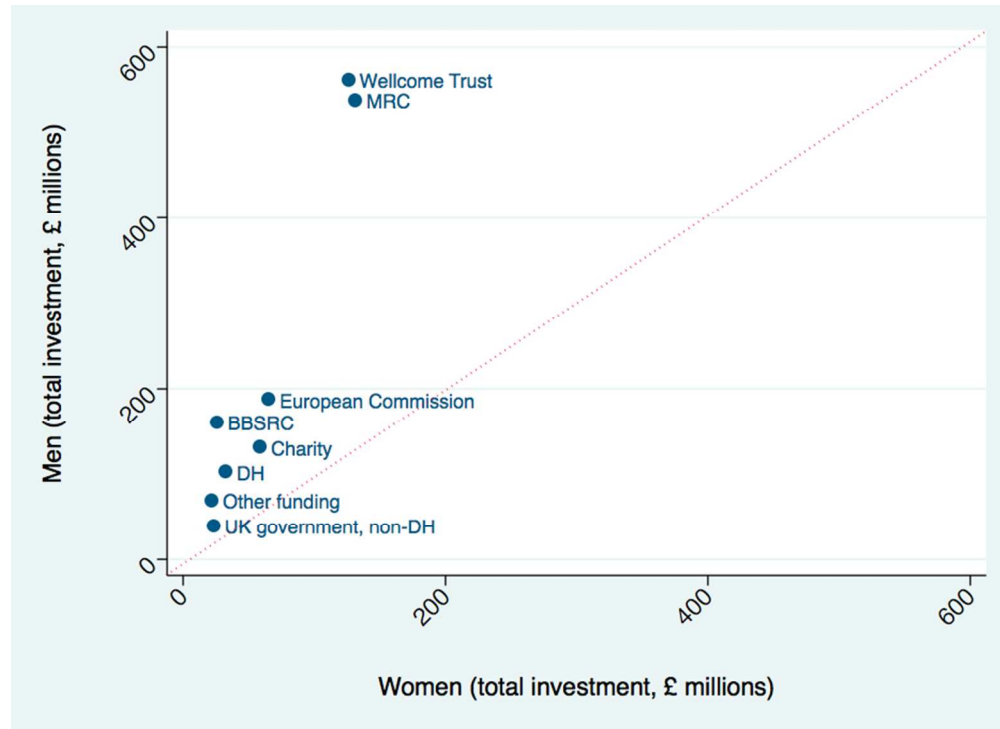

329x239mm (72 x 72 DPI)

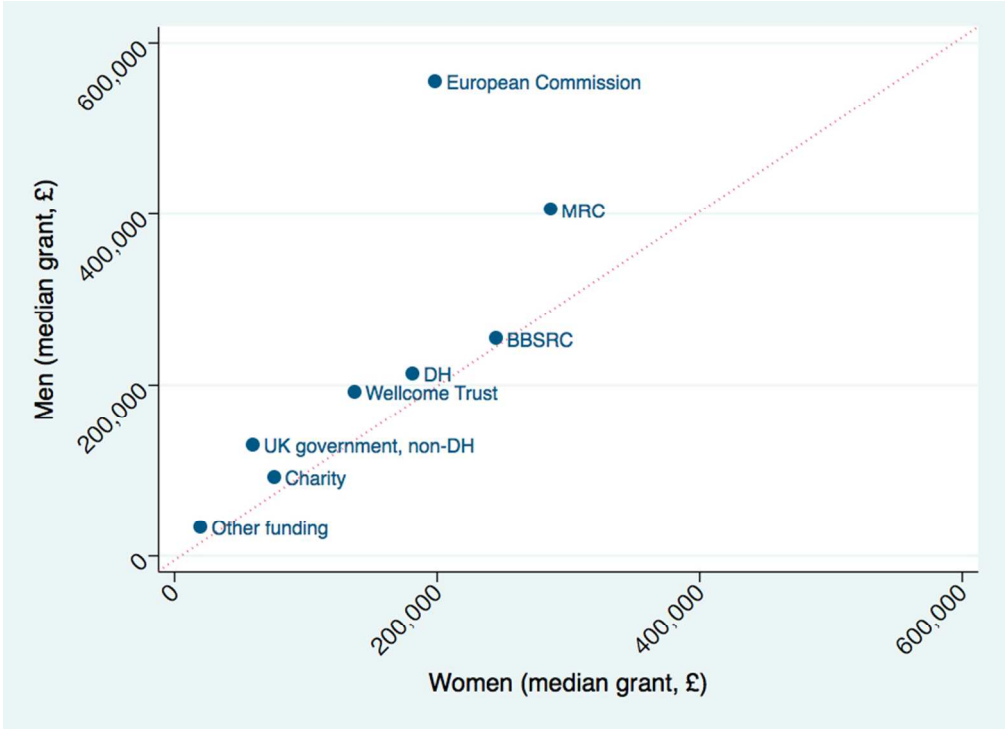

329x239mm (72 x 72 DPI)

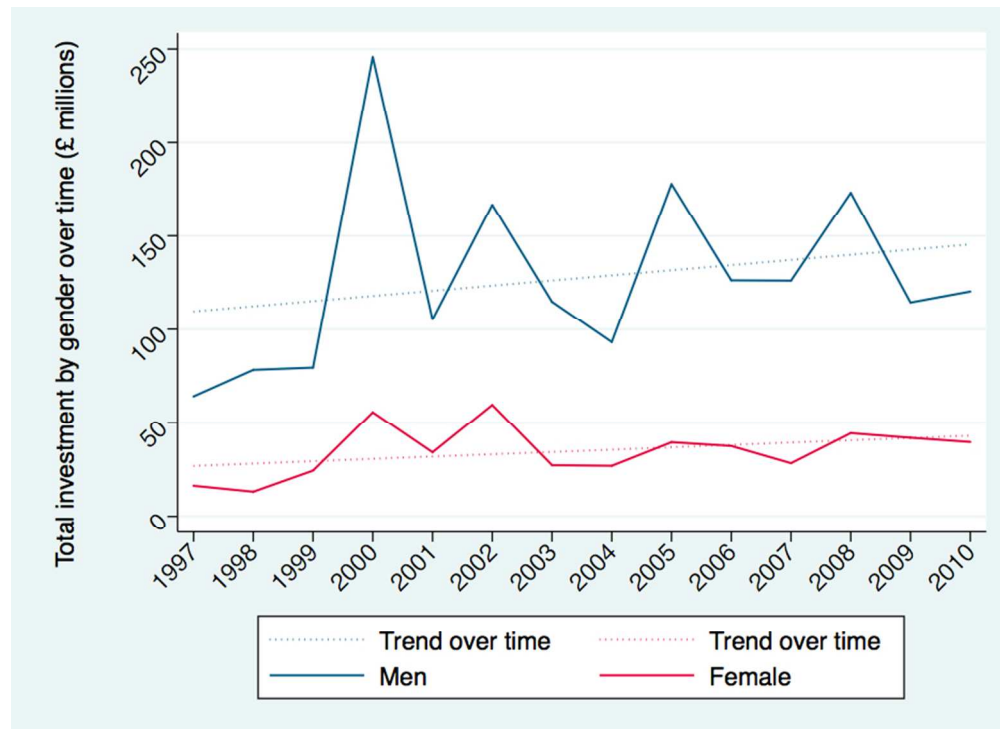

329x239mm (72 x 72 DPI)



Figure 5b. Fold difference of investment over time, by gender  
329x239mm (72 x 72 DPI)

| Disease system                   | Investment (total); £ (%) | Investment (male); £ (%) | Investment (female); £ | Fold difference | Studies (total); n | Studies (male); £ | Studies (female); n | Fold difference | Mean grant (total); £ | Mean grant (male); £ | Mean grant (female); £ | Fold difference | P    | Median grant (total); £ (IQR) | Median grant (male); £ | Median grant (female); £ | Fold difference | Chi-square | P    |
|----------------------------------|---------------------------|--------------------------|------------------------|-----------------|--------------------|-------------------|---------------------|-----------------|-----------------------|----------------------|------------------------|-----------------|------|-------------------------------|------------------------|--------------------------|-----------------|------------|------|
| 1 Gastrointestinal infections    | 248,971,849               | 209,315,616              | 37,043,642             | 5.65            | 799                | 638               | 149                 | 4.28            | 315,154               | 328,081              | 248,615                | 1.32            | 0.01 | 199,043                       | 208,369                | 155,066                  | 1.34            | 6.87       | 0.01 |
| 2                                | 9.6%                      | 85.0%                    | 15.0%                  |                 | 12.9%              | 81.1%             | 18.9%               |                 | 457,988               | 458,720              | 433,176                |                 |      | 721,37-351,372                | 78,852-357,771         | 143,637-305,928          |                 |            |      |
| 3 Haematological infections      | 413,489,870               | 225,660,012              | 56,021,079             | 4.03            | 742                | 540               | 183                 | 2.95            | 557,264               | 417,889              | 306,126                | 1.37            | 0.01 | 157,280                       | 160,655                | 121,353                  | 1.32            | 3.15       | 0.08 |
| 4                                | 15.9%                     | 80.1%                    | 19.9%                  |                 | 12.0%              | 74.7%             | 25.3%               |                 | 2,179,537             | 914,626              | 819,910                |                 |      | 157,280-362,727               | 54,244-366,795         | 32,207- 271,883          |                 |            |      |
| 5 Hepatic infections             | 73,965,716                | 57,998,793               | 15,618,661             | 3.71            | 322                | 229               | 90                  | 2.54            | 229,707               | 253,270              | 173,541                | 1.46            | 0.07 | 114,621                       | 118,638                | 68,620                   | 1.73            | 3.82       | 0.05 |
| 6                                | 2.8%                      | 78.8%                    | 21.2%                  |                 | 5.2%               | 71.8%             | 28.2%               |                 | 375,988               | 418,392              | 237,165                |                 |      | 40,076-244,293                | 41,342-269,625         | 26,270-221,952           |                 |            |      |
| 7 Neglected tropical diseases    | 229,606,965               | 118,477,812              | 37,747,437             | 3.14            | 392                | 280               | 105                 | 2.67            | 564,145               | 418,439              | 406,270                | 1.03            | 0.28 | 249,458                       | 257,736                | 199,648                  | 1.29            | 0.82       | 0.36 |
| 8                                | 8.8%                      | 75.8%                    | 24.2%                  |                 | 6.4%               | 72.7%             | 27.3%               |                 | 2,104,383             | 509,169              | 667,547                |                 |      | 91,196-451,453                | 82,786-429,781         | 107,474-413,242          |                 |            |      |
| 9 Parasitological infections     | 101,885,586               | 79,281,163               | 18,779,321             | 4.22            | 339                | 268               | 67                  | 4.00            | 300,548               | 295,825              | 280,288                | 1.06            | 0.67 | 155,404                       | 153,724                | 166,514                  | 0.92            | 0.19       | 0.66 |
| 10                               | 3.9%                      | 80.8%                    | 19.2%                  |                 | 5.5%               | 80.0%             | 20.0%               |                 | 463,870               | 474,995              | 329,198                |                 |      | 64,434-334,128                | 64,702-298,665         | 33,886-399,971           |                 |            |      |
| 11 Zoonotic infections           | 7,407,218                 | 5,788,089                | 1,619,129              | 3.57            | 36                 | 24                | 12                  | 2.00            | 205,756               | 241,170              | 134,927                | 1.79            | 0.92 | 120,849                       | 146,169                | 102,901                  | 1.42            | 0.00       | 1.00 |
| 12                               | 0.3%                      | 78.1%                    | 21.9%                  |                 | 0.6%               | 66.7%             | 33.3%               |                 | 280,206               | 327,354              | 132,475                |                 |      | 7,860-293,837                 | 6,344-348,501          | 23,666-232,501           |                 |            |      |
| 13 Respiratory infections        | 418,838,875               | 312,055,217              | 84,436,423             | 3.70            | 1,190              | 897               | 272                 | 3.30            | 351,375               | 347,888              | 310,428                | 1.12            | 0.13 | 158,966                       | 165,813                | 142,281                  | 1.17            | 1.87       | 0.17 |
| 14                               | 16.1%                     | 78.7%                    | 21.3%                  |                 | 19.3%              | 76.7%             | 23.3%               |                 | 661,990               | 624,555              | 558,282                |                 |      | 50,203-342,049                | 56,715-344,512         | 36,236-311,548           |                 |            |      |
| 15 Sexually-transmitted infectio | 138,616,211               | 86,016,584               | 45,352,512             | 1.90            | 380                | 190               | 182                 | 1.04            | 366,710               | 452,719              | 249,190                | 1.82            | 0.34 | 94,790                        | 93,495                 | 101,785                  | 0.92            | 0.17       | 0.68 |
| 16                               | 5.3%                      | 65.5%                    | 34.5%                  |                 | 6.2%               | 51.1%             | 48.9%               |                 | 958,450               | 1,142,638            | 647,494                |                 |      | 15,332-241,505                | 18,389-257,444         | 14,480-204,559           |                 |            |      |
| 17 HIV                           | 477,555,690               | 290,848,557              | 79,652,343             | 3.65            | 760                | 448               | 286                 | 1.57            | 625,073               | 649,216              | 278,505                | 2.33            | 0.01 | 147,404                       | 163,462                | 114,272                  | 1.43            | 3.87       | 0.05 |
| 18                               | 18.4%                     | 78.5%                    | 21.5%                  |                 | 12.3%              | 61.0%             | 39.0%               |                 | 2,276,762             | 1,550,920            | 545,657                |                 |      | 37,195-395,644                | 39,153-511,800         | 29,880-305,339           |                 |            |      |
| 19 Overall                       | 2,599,985,851             | 1,785,979,172            | 488,178,602            | 3.66            | 6,170              | 4,357             | 1,695               | 2.57            | 421,733               | 409,910              | 288,011                | 1.42            | 0.01 | 158,055                       | 179,389                | 125,556                  | 1.43            | 74.40      | 0.01 |
| 20                               |                           | 78.53%                   | 21.47%                 |                 |                    | 71.99%            | 28.01%              |                 | 1,315,935             | 840,087              | 704,474                |                 |      | 49,490-352,699                | 59,146-371,977         | 30,983-261,835           |                 |            |      |





|    |                           |               |               |             |         |       |         |         |         |           |         |         |       |      |                 |                |                 |      |       |      |
|----|---------------------------|---------------|---------------|-------------|---------|-------|---------|---------|---------|-----------|---------|---------|-------|------|-----------------|----------------|-----------------|------|-------|------|
|    |                           | #VALUE!       | 70.3%         | 29.7%       |         | 1.2%  | 59.6%   | 40.4%   |         | 720,790   | 908,183 | 287,596 |       |      | 52,597-421,960  | 40,009-446,395 | 147,885-439,305 |      |       |      |
| 1  | Syphilis                  | 1,061,560     | 286,117       | 775,444     | 0.37    | 5     | 2       | 3       | 0.67    | 212,312   | 143,058 | 258,481 | 0.55  | 0.56 | 207,346         | 143,058        | 207,346         | 0.69 | 0.14  | 0.71 |
| 2  |                           | #VALUE!       | 27.0%         | 73.0%       |         | 0.1%  | 40.0%   | 60.0%   |         | 152,848   | 122,822 | 176,603 |       |      | 113,088-229,907 | 56,210-229,907 | 113,088-455,010 |      |       |      |
| 3  |                           |               |               |             |         |       |         |         |         |           |         |         |       |      |                 |                |                 |      |       |      |
| 4  | Other infections          |               |               |             |         |       |         |         |         |           |         |         |       |      |                 |                |                 |      |       |      |
| 5  | Aspergillus               | 4,853,858     | 4,482,101     | 371,757     | 12.06   | 26    | 24      | 2       | 12.00   | 186,687   | 186,754 | 185,879 | 1.00  | 1.00 | 47,948          | 47,948         | 185,879         | 0.26 | 0.00  | 1.00 |
| 6  |                           | #VALUE!       | 92.3%         | 7.7%        |         | 0.7%  | 92.3%   | 7.7%    |         | 420,903   | 435,756 | 248,298 |       |      | 19,703-157,829  | 20,890-135,113 | 10,306-361,451  |      |       |      |
| 7  | Candida                   | 1,219,072     | 1,194,064     | 25,008      | 47.75   | 8     | 6       | 2       | 3.00    | 152,384   | 199,011 | 12,504  | 15.92 | 0.18 | 28,518          | 72,375         | 12,504          | 5.79 | 2.67  | 0.10 |
| 8  |                           | #VALUE!       | 97.9%         | 2.1%        |         | 0.2%  | 75.0%   | 25.0%   |         | 262,390   | 293,075 | 17,226  |       |      | 10,508-188,568  | 17,076-264,740 | 324-24,684      |      |       |      |
| 9  | Pseudomonas               | 6,473,237     | 6,096,633     | 376,604     | 16.19   | 43    | 39      | 4       | 9.75    | 150,540   | 156,324 | 94,151  | 1.66  | 0.90 | 81,793          | 81,793         | 79,244          | 1.03 | 0.00  | 0.96 |
| 10 |                           | #VALUE!       | 94.2%         | 5.8%        |         | 1.1%  | 90.7%   | 9.3%    |         | 175,911   | 182,442 | 83,286  |       |      | 11,204-253,337  | 11,108-253,459 | 27,396-160,906  |      |       |      |
| 11 | VZV                       | 4,186,583     | 1,472,968     | 2,713,615   | 0.54    | 20    | 9       | 11      | 0.82    | 209,329   | 163,663 | 246,692 | 0.66  | 0.21 | 145,505         | 47,343         | 161,033         | 0.29 | 0.20  | 0.65 |
| 12 |                           | #VALUE!       | 35.2%         | 64.8%       |         | 0.5%  | 45.0%   | 55.0%   |         | 261,063   | 250,869 | 275,194 |       |      | 46,117-227,502  | 26,213-147,593 | 105,632-233,537 |      |       |      |
| 13 | Total specific infections | #VALUE!       | #VALUE!       | #VALUE!     | #VALUE! | 3,953 | #VALUE! | #VALUE! | #VALUE! |           |         |         |       |      | 158,055         |                |                 |      |       |      |
| 14 | Overall                   | 2,599,985,851 | 1,785,979,172 | 488,178,602 | 3.66    | 6,170 | 4,357   | 1,695   | 2.57    | 421,733   | 409,910 | 288,011 | 1.42  | 0.01 | 49,490-352,699  | 179,389        | 125,556         | 1.43 | 74.40 | 0.01 |
| 15 |                           |               | 78.53%        | 21.47%      |         |       | 71.99%  | 28.01%  |         | 1,315,935 | 840,087 | 704,474 |       |      |                 |                |                 |      |       |      |
| 16 |                           |               |               |             |         |       |         |         |         |           |         |         |       |      |                 |                |                 |      |       |      |
| 17 |                           |               |               |             |         |       |         |         |         |           |         |         |       |      |                 |                |                 |      |       |      |
| 18 |                           |               |               |             |         |       |         |         |         |           |         |         |       |      |                 |                |                 |      |       |      |
| 19 |                           |               |               |             |         |       |         |         |         |           |         |         |       |      |                 |                |                 |      |       |      |
| 20 |                           |               |               |             |         |       |         |         |         |           |         |         |       |      |                 |                |                 |      |       |      |
| 21 |                           |               |               |             |         |       |         |         |         |           |         |         |       |      |                 |                |                 |      |       |      |
| 22 |                           |               |               |             |         |       |         |         |         |           |         |         |       |      |                 |                |                 |      |       |      |
| 23 |                           |               |               |             |         |       |         |         |         |           |         |         |       |      |                 |                |                 |      |       |      |
| 24 |                           |               |               |             |         |       |         |         |         |           |         |         |       |      |                 |                |                 |      |       |      |
| 25 |                           |               |               |             |         |       |         |         |         |           |         |         |       |      |                 |                |                 |      |       |      |
| 26 |                           |               |               |             |         |       |         |         |         |           |         |         |       |      |                 |                |                 |      |       |      |
| 27 |                           |               |               |             |         |       |         |         |         |           |         |         |       |      |                 |                |                 |      |       |      |
| 28 |                           |               |               |             |         |       |         |         |         |           |         |         |       |      |                 |                |                 |      |       |      |
| 29 |                           |               |               |             |         |       |         |         |         |           |         |         |       |      |                 |                |                 |      |       |      |
| 30 |                           |               |               |             |         |       |         |         |         |           |         |         |       |      |                 |                |                 |      |       |      |
| 31 |                           |               |               |             |         |       |         |         |         |           |         |         |       |      |                 |                |                 |      |       |      |
| 32 |                           |               |               |             |         |       |         |         |         |           |         |         |       |      |                 |                |                 |      |       |      |
| 33 |                           |               |               |             |         |       |         |         |         |           |         |         |       |      |                 |                |                 |      |       |      |
| 34 |                           |               |               |             |         |       |         |         |         |           |         |         |       |      |                 |                |                 |      |       |      |
| 35 |                           |               |               |             |         |       |         |         |         |           |         |         |       |      |                 |                |                 |      |       |      |
| 36 |                           |               |               |             |         |       |         |         |         |           |         |         |       |      |                 |                |                 |      |       |      |
| 37 |                           |               |               |             |         |       |         |         |         |           |         |         |       |      |                 |                |                 |      |       |      |
| 38 |                           |               |               |             |         |       |         |         |         |           |         |         |       |      |                 |                |                 |      |       |      |
| 39 |                           |               |               |             |         |       |         |         |         |           |         |         |       |      |                 |                |                 |      |       |      |
| 40 |                           |               |               |             |         |       |         |         |         |           |         |         |       |      |                 |                |                 |      |       |      |
| 41 |                           |               |               |             |         |       |         |         |         |           |         |         |       |      |                 |                |                 |      |       |      |
| 42 |                           |               |               |             |         |       |         |         |         |           |         |         |       |      |                 |                |                 |      |       |      |
| 43 |                           |               |               |             |         |       |         |         |         |           |         |         |       |      |                 |                |                 |      |       |      |
| 44 |                           |               |               |             |         |       |         |         |         |           |         |         |       |      |                 |                |                 |      |       |      |
| 45 |                           |               |               |             |         |       |         |         |         |           |         |         |       |      |                 |                |                 |      |       |      |
| 46 |                           |               |               |             |         |       |         |         |         |           |         |         |       |      |                 |                |                 |      |       |      |
| 47 |                           |               |               |             |         |       |         |         |         |           |         |         |       |      |                 |                |                 |      |       |      |
| 48 |                           |               |               |             |         |       |         |         |         |           |         |         |       |      |                 |                |                 |      |       |      |
| 49 |                           |               |               |             |         |       |         |         |         |           |         |         |       |      |                 |                |                 |      |       |      |

| Funder                          | Investment (total); £ (%) | Investment (male); £ (%) | Investment (female); £ (%) | Ratio difference | Studies (total); n (%) | Studies (male); £ (%) | Studies (female); £ (%) | Ratio difference | Mean grant (total); £ (SD) | Mean grant (male); £ (SD) | Mean grant (female); £ (SD) | Ratio difference | P    | Median grant (total); £ (IQR) | Median grant (male); £ (IQR) | Median grant (female); £ (IQR) | Ratio difference | Chi-square | P    |
|---------------------------------|---------------------------|--------------------------|----------------------------|------------------|------------------------|-----------------------|-------------------------|------------------|----------------------------|---------------------------|-----------------------------|------------------|------|-------------------------------|------------------------------|--------------------------------|------------------|------------|------|
| Public funding                  | 1,393,972,967             | 1,025,211,218            | 279,810,244                | 3.66             | 1,082                  | 1,722                 | 624                     | 2.76             | 588,503                    | 595,361                   | 448,414                     | 1.17             | 0.01 | 255,992                       | 272,452                      | 213,718                        | 1.27             | 29.38      | 0.01 |
|                                 | 53.6%                     | 78.6%                    | 21.4%                      |                  | 17.6%                  | 73.4%                 | 26.6%                   |                  | 1,447,668                  | 1,080,718                 | 814,979                     |                  |      | 127,167-529,610               | 138,322- 572,529             | 92,880-402,917                 |                  |            |      |
| BSRC                            | 186,268,429               | 160,120,540              | 26,147,889                 | 6.12             | 578                    | 485                   | 93                      | 5.22             | 322,264                    | 330,145                   | 281,160                     | 1.17             | 0.78 | 253,398                       | 253,498                      | 244,972                        | 1.03             | 0.12       | 0.73 |
|                                 | 7.2%                      | 86.0%                    | 14.0%                      |                  | 9.4%                   | 83.9%                 | 16.1%                   |                  | 361,565                    | 383,963                   | 205,593                     |                  |      | 169,787-365,159               | 176,763-363,830              | 149,828-371,577                |                  |            |      |
| DFID                            |                           |                          |                            |                  |                        |                       |                         |                  |                            |                           |                             |                  |      |                               |                              |                                |                  |            |      |
|                                 |                           |                          |                            |                  |                        |                       |                         |                  |                            |                           |                             |                  |      |                               |                              |                                |                  |            |      |
| CH                              | 134,961,745               | 101,933,746              | 32,757,325                 | 3.11             | 285                    | 194                   | 89                      | 2.18             | 473,550                    | 525,432                   | 368,060                     | 1.43             | 0.37 | 203,544                       | 213,107                      | 181,697                        | 1.17             | 0.36       | 0.55 |
|                                 | 5.2%                      | 75.7%                    | 24.3%                      |                  | 4.6%                   | 68.6%                 | 31.4%                   |                  | 846,024                    | 968,640                   | 482,041                     |                  |      | 72,628-514,066                | 72,627-542,097               | 65,015-383,886                 |                  |            |      |
| European Commission             | 255,015,533               | 186,846,015              | 65,558,847                 | 2.85             | 219                    | 141                   | 71                      | 1.99             | 1,164,454                  | 1,325,149                 | 923,364                     | 1.44             | 0.58 | 439,762                       | 555,497                      | 199,133                        | 2.79             | 3.58       | 0.06 |
|                                 | 9.8%                      | 74.0%                    | 26.0%                      |                  | 3.6%                   | 66.5%                 | 33.5%                   |                  | 2,084,358                  | 2,409,860                 | 1,316,016                   |                  |      | 127,419-1,454,94              | 123,042-1,504,88             | 134,621-1,449,403              |                  |            |      |
| MAC                             | 672,895,698               | 537,260,180              | 131,751,245                | 4.08             | 962                    | 715                   | 242                     | 2.95             | 699,476                    | 751,413                   | 544,427                     | 1.38             | 0.01 | 366,479                       | 404,615                      | 286,679                        | 1.41             | 18.44      | 0.01 |
|                                 | 25.9%                     | 80.3%                    | 19.7%                      |                  | 15.6%                  | 74.7%                 | 25.3%                   |                  | 993,012                    | 1,020,748                 | 884,442                     |                  |      | 199,287-713,178               | 210,068-811,860              | 178,182-468,998                |                  |            |      |
| UK government, non-             | 144,831,562               | 39,050,737               | 23,594,939                 | 1.66             | 237                    | 187                   | 129                     | 1.45             | 452,898                    | 208,828                   | 182,907                     | 1.14             | 0.01 | 110,178                       | 129,660                      | 59,976                         | 2.16             | 3.79       | 0.05 |
|                                 | 5.6%                      | 62.3%                    | 37.7%                      |                  | 3.8%                   | 59.2%                 | 40.8%                   |                  | 2,811,384                  | 492,519                   | 619,889                     |                  |      | 19,073-206,784                | 23,761- 207,320              | 12,564-157,053                 |                  |            |      |
| Philanthropy                    | 1,108,966,983             | 691,680,388              | 185,866,898                | 3.72             | 2,879                  | 2,044                 | 768                     | 2.66             | 383,601                    | 338,396                   | 242,014                     | 1.40             | 0.01 | 146,060                       | 153,653                      | 114,173                        | 1.35             | 23.28      | 0.01 |
|                                 | 42.7%                     | 78.8%                    | 21.2%                      |                  | 46.7%                  | 72.7%                 | 27.3%                   |                  | 1,377,079                  | 659,025                   | 711,420                     |                  |      | 52,433-286,518                | 58,589-302,774               | 42,658-222,842                 |                  |            |      |
| Bill & Melinda Gates Foundation | 220,923,242               |                          |                            |                  | 39                     |                       |                         |                  | 5,664,699                  |                           |                             |                  |      | 1,488,432                     |                              |                                |                  |            |      |
|                                 | 8.5%                      |                          |                            |                  | 0.6%                   |                       |                         |                  | 8,966,093                  |                           |                             |                  |      | 628,545-5,576,863             |                              |                                |                  |            |      |
| Charity                         | 199,703,382               | 130,726,509              | 58,989,705                 | 2.22             | 855                    | 619                   | 217                     | 2.85             | 227,332                    | 211,190                   | 271,842                     | 0.78             | 0.01 | 87,318                        | 91,991                       | 76,058                         | 1.21             | 5.23       | 0.02 |
|                                 | 7.7%                      | 68.9%                    | 31.1%                      |                  | 13.9%                  | 74.0%                 | 26.0%                   |                  | 730,057                    | 454,108                   | 1,208,852                   |                  |      | 27,616-167,829                | 36,429-172,497               | 17,279-150,727                 |                  |            |      |
| Wellcome Trust                  | 688,340,359               | 560,953,880              | 126,592,102                | 4.43             | 1,985                  | 1,425                 | 550                     | 2.59             | 346,818                    | 393,652                   | 230,168                     | 1.71             | 0.01 | 168,434                       | 191,461                      | 137,241                        | 1.40             | 39.83      | 0.01 |
|                                 | 26.5%                     | 81.6%                    | 18.4%                      |                  | 32.2%                  | 72.2%                 | 27.8%                   |                  | 646,625                    | 723,549                   | 362,836                     |                  |      | 66,419-335,557                | 74,759-362,424               | 54,019-250,723                 |                  |            |      |
| Other funding                   | 103,542,992               | 69,087,566               | 22,501,460                 | 3.07             | 1,010                  | 591                   | 303                     | 1.95             | 103,683                    | 116,899                   | 74,262                      | 1.57             | 0.01 | 28,626                        | 32,557                       | 20,373                         | 1.60             | 4.80       | 0.03 |
|                                 | 4.0%                      | 75.4%                    | 24.6%                      |                  | 16.4%                  | 66.1%                 | 33.9%                   |                  | 273,102                    | 309,358                   | 154,373                     |                  |      | 6,282-105,082                 | 7,225-113,479                | 4,408-79,809                   |                  |            |      |
| Overall                         | 2,599,985,851             | 1,785,979,172            | 488,178,602                | 3.66             | 6,165                  | 4,357                 | 1,695                   | 2.57             | 421,733                    | 409,910                   | 288,011                     | 1.42             | 0.01 | 158,055                       | 179,389                      | 125,556                        | 1.43             | 74.40      | 0.01 |
|                                 |                           | 78.5%                    | 21.5%                      |                  |                        | 72.0%                 | 28.0%                   |                  | 1,315,935                  | 840,087                   | 704,474                     |                  |      | 49,490-352,699                | 59,146-371,977               | 30,983-261,835                 |                  |            |      |

1  
2  
3  
4  
5  
6  
7  
8  
9  
10  
11  
12  
13  
14  
15  
16  
17  
18  
19  
20  
21  
22  
23  
24  
25  
26  
27  
28  
29  
30  
31  
32  
33  
34  
35  
36  
37  
38  
39  
40  
41  
42  
43  
44  
45  
46  
47  
48  
49

| Year          | Investment<br>(male); £ | Change from<br>previous year<br>(male); £ | Fold<br>difference<br>(male) | P    | Change<br>over 1997<br>(male); £ | Fold<br>difference<br>(male) | P    | Investment<br>(female); £ | Change from<br>previous year<br>(female); £ | Fold<br>difference<br>(female) | P    | Change<br>over 1997<br>(female); £ | Fold<br>difference<br>(female) | P    | Investme<br>nt (male);<br>% | Investment<br>(female);<br>% | Absolute<br>difference<br>(gender) | Fold<br>difference<br>(gender) |
|---------------|-------------------------|-------------------------------------------|------------------------------|------|----------------------------------|------------------------------|------|---------------------------|---------------------------------------------|--------------------------------|------|------------------------------------|--------------------------------|------|-----------------------------|------------------------------|------------------------------------|--------------------------------|
| 1997          | 64,158,003              |                                           |                              |      |                                  |                              |      | 16,305,109                |                                             |                                |      |                                    |                                |      | 79.7%                       | 20.3%                        | 47,852,894                         | 3.93                           |
| 1998          | 78,287,824              | 14,129,821                                | 1.22                         | 0.57 | 14,129,821                       | 1.22                         | 0.57 | 13,110,597                | -3,194,512                                  | 0.80                           | 0.90 | -3,194,512                         | 0.80                           | 0.90 | 85.7%                       | 14.3%                        | 65,177,227                         | 5.97                           |
| 1999          | 79,477,324              | 1,189,500                                 | 1.02                         | 0.37 | 15,319,321                       | 1.24                         | 0.14 | 24,366,507                | 11,255,911                                  | 1.86                           | 0.79 | 8,061,398                          | 1.49                           | 0.88 | 76.5%                       | 23.5%                        | 55,110,816                         | 3.26                           |
| 2000          | 245,740,477             | 166,263,153                               | 3.09                         | 0.00 | 181,582,474                      | 3.83                         | 0.01 | 55,636,657                | 31,270,150                                  | 2.28                           | 0.01 | 39,331,548                         | 3.41                           | 0.01 | 81.5%                       | 18.5%                        | 190,103,820                        | 4.42                           |
| 2001          | 105,423,252             | -140,317,225                              | 0.43                         | 0.09 | 41,265,248                       | 1.64                         | 0.01 | 34,133,067                | -21,503,591                                 | 0.61                           | 0.23 | 17,827,958                         | 2.09                           | 0.01 | 75.5%                       | 24.5%                        | 71,290,185                         | 3.09                           |
| 2002          | 166,695,481             | 61,272,230                                | 1.58                         | 0.89 | 102,537,478                      | 2.60                         | 0.01 | 59,568,874                | 25,435,807                                  | 1.75                           | 0.41 | 43,263,765                         | 3.65                           | 0.01 | 73.7%                       | 26.3%                        | 107,126,607                        | 2.80                           |
| 2003          | 114,827,602             | -51,867,880                               | 0.69                         | 0.03 | 50,669,599                       | 1.79                         | 0.50 | 27,241,313                | -32,327,560                                 | 0.46                           | 0.14 | 10,936,204                         | 1.67                           | 0.05 | 80.8%                       | 19.2%                        | 87,586,288                         | 4.22                           |
| 2004          | 93,129,587              | -21,698,015                               | 0.81                         | 0.09 | 28,971,584                       | 1.45                         | 0.30 | 26,908,997                | -332,316                                    | 0.99                           | 0.91 | 10,603,888                         | 1.65                           | 0.04 | 77.6%                       | 22.4%                        | 66,220,590                         | 3.46                           |
| 2005          | 177,791,995             | 84,662,408                                | 1.91                         | 0.03 | 113,633,992                      | 2.77                         | 0.26 | 39,460,786                | 12,551,789                                  | 1.47                           | 0.60 | 23,155,677                         | 2.42                           | 0.01 | 81.8%                       | 18.2%                        | 138,331,209                        | 4.51                           |
| 2006          | 126,329,085             | -51,462,910                               | 0.71                         | 0.60 | 62,171,082                       | 1.97                         | 0.54 | 37,473,263                | -1,987,522                                  | 0.95                           | 0.35 | 21,168,154                         | 2.30                           | 0.03 | 77.1%                       | 22.9%                        | 88,855,822                         | 3.37                           |
| 2007          | 126,144,324             | -184,761                                  | 1.00                         | 0.03 | 61,986,320                       | 1.97                         | 0.12 | 28,293,204                | -9,180,059                                  | 0.76                           | 0.01 | 11,988,095                         | 1.74                           | 0.48 | 81.7%                       | 18.3%                        | 97,851,119                         | 4.46                           |
| 2008          | 173,132,770             | 46,988,446                                | 1.37                         | 0.07 | 108,974,767                      | 2.70                         | 0.01 | 44,307,821                | 16,014,617                                  | 1.57                           | 0.70 | 28,002,712                         | 2.72                           | 0.73 | 79.6%                       | 20.4%                        | 128,824,949                        | 3.91                           |
| 2009          | 114,490,290             | -58,642,480                               | 0.66                         | 0.12 | 50,332,287                       | 1.78                         | 0.01 | 41,820,953                | -2,486,868                                  | 0.94                           | 0.03 | 25,515,844                         | 2.56                           | 0.01 | 73.2%                       | 26.8%                        | 72,669,337                         | 2.74                           |
| 2010          | 120,351,159             | 5,860,868                                 | 1.05                         | 0.33 | 56,193,155                       | 1.88                         | 0.01 | 39,551,453                | -2,269,500                                  | 0.95                           | 0.56 | 23,246,344                         | 2.43                           | 0.06 | 75.3%                       | 24.7%                        | 80,799,705                         | 3.04                           |
| Mean          | 127,569,941             | 4,322,550                                 |                              |      | 68,289,779                       |                              |      | 34,869,900                | 1,788,180                                   | #####                          |      | #####                              |                                |      | 78.6%                       | 21.4%                        | 92,700,041                         |                                |
| SD            | 48,770,855              | 76,214,220                                |                              |      | 47,073,847                       |                              |      | 13,365,475                | 17,657,139                                  | #####                          |      | #####                              |                                |      |                             |                              | 38,264,674                         |                                |
| Total Gende   | 1,785,979,172           |                                           |                              |      |                                  |                              |      | 488,178,602               |                                             |                                |      |                                    |                                |      |                             |                              | 1,297,800,569                      | 3.66                           |
| Total Overall | 2,599,985,851           |                                           |                              |      |                                  |                              |      |                           |                                             |                                |      |                                    |                                |      |                             |                              |                                    |                                |

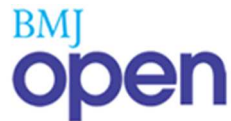

**Differences in research funding for women scientists: a systematic comparison of UK investments in global infectious disease research 1997–2010**

|                                 |                                                                                                                                                                                                                                                                             |
|---------------------------------|-----------------------------------------------------------------------------------------------------------------------------------------------------------------------------------------------------------------------------------------------------------------------------|
| Journal:                        | <i>BMJ Open</i>                                                                                                                                                                                                                                                             |
| Manuscript ID:                  | bmjopen-2013-003362.R2                                                                                                                                                                                                                                                      |
| Article Type:                   | Research                                                                                                                                                                                                                                                                    |
| Date Submitted by the Author:   | 12-Oct-2013                                                                                                                                                                                                                                                                 |
| Complete List of Authors:       | Head, Michael; University College London, Infection & Population Health<br>Fitchett, Joseph; London School of Hygiene & Tropical Medicine,<br>Cooke, Mary; University College London,<br>Wurie, Fatima; University College London,<br>Atun, Rifat; Imperial College London, |
| <b>Primary Subject Heading</b>: | Infectious diseases                                                                                                                                                                                                                                                         |
| Secondary Subject Heading:      | Global health                                                                                                                                                                                                                                                               |
| Keywords:                       | INFECTIOUS DISEASES, PUBLIC HEALTH, STATISTICS & RESEARCH METHODS, VIROLOGY, PARASITOLOGY, MYCOLOGY                                                                                                                                                                         |
|                                 |                                                                                                                                                                                                                                                                             |

SCHOLARONE™  
Manuscripts

**Differences in research funding for women scientists: a systematic comparison of UK investments in global infectious disease research 1997–2010**

Michael G Head<sup>a\*</sup>, Joseph R Fitchett<sup>b</sup>, Mary K Cooke<sup>a</sup>, Fatima B Wurie<sup>a</sup>, Rifat Atun<sup>c</sup>

a University College London, Research Department of Infection and Population Health, UCL Royal Free Campus, Rowland Hill Street, London, NW3 2PF

b London School of Hygiene & Tropical Medicine, Keppel Street, London, WC1E 7HT

c Imperial College London, South Kensington Campus, London SW7 2AZ and Harvard School of Public Health, Harvard University, Boston, USA

\*Corresponding Author

Number of Words: **3 758**

**Keywords** – gender, funding, research, women,

## Abstract

**Objectives:** There has not previously been a systematic comparison of awards for research funding in infectious diseases by sex. We investigated funding awards to UK institutions for all infectious disease research from 1997 to 2010, across disease categories and along the research and development continuum.

**Design:** Systematic comparison

**Methods:** Data were obtained from several sources for awards from the period 1997-2010 and each study assigned to - disease categories; type of science (pre-clinical, phases I-III trials, product development, implementation research); categories of funding organisation. Fold differences and statistical analysis were used to compare total investment, study numbers, mean grant, and median grant between men and women.

**Results:** 6052 studies were included in the final analysis, comprising 4357 grants (72.0%) awarded to men and 1695 grants (28.0%) awarded to women, totalling £2.274 billion. Of this, men received £1.786 billion (78.5%) and women £488 million (21.5%). The median value of award was greater for men (£179 389; IQR £59146–£371 977) than women (£125 556; IQR £30 982–£261 834).

Awards were greater for male PIs across all infectious disease systems, excepting neurological infections and sexually transmitted infections. The proportion of total funding awarded to women ranged from 14.3% in 1998 to 26.8% in 2009 (mean 21.4%), and was lowest for pre-clinical research at 18.2% (£285.5 million of £1.573 billion) and highest for operational research at 30.9% (£151.4 million of £489.7 million).

**Conclusions:** There are consistent differences in funding received by men and women principal investigators: women have fewer funded studies and receive less funding in absolute and in relative terms; the median funding awarded to women is lower across most

infectious disease areas, by funder, and type of science. These differences remain broadly unchanged over the 14-year study period.

**Article summary**

Article focus

- We explore the distribution of funding across infectious disease research by the gender of principal investigator to identify any differences in funding received by men and women researchers in the UK.

Key messages

- There are consistent differences in funding received by men and women principal investigators (PIs) in infectious disease research funded in the UK.
- Total funding and the median award across most disease areas and type of science is typically greater in male PIs than female PIs
- These differences remain consistent over the time period of analysis (1997-2010)

Strengths and limitations of this study

- This is the first study to present detailed data and rigorously quantify funding differences between men and women researchers in infectious disease research in the UK.
- Our results provides new and additional evidence on differences on funding for men and women researchers highlighted in earlier studies and provides a case for new research to explain the source of these differences, especially given government commitments to increase the number of women in science

- We were unable to assess the success and failure rates by gender and thus cannot comment on the extent of inequalities or bias. As we could not feasibly access data on the academic ranking of principal investigators, we were hence unable to adjust for levels of seniority across both genders. A follow-up study incorporating this data would allow for more meaningful conclusions to be drawn about the nature of any possible disparities.

For peer review only

1  
2  
3  
4  
5  
6  
7  
8  
9  
10  
11  
12  
13  
14  
15  
16  
17  
18  
19  
20  
21  
22  
23  
24  
25  
26  
27  
28  
29  
30  
31  
32  
33  
34  
35  
36  
37  
38  
39  
40  
41  
42  
43  
44  
45  
46  
47  
48  
49  
50  
51  
52  
53  
54  
55  
56  
57  
58  
59  
60

**Introduction**

Women are under-represented in biomedical science, yet few studies have systematically explored the extent and reasons for the observed differences between men and women scientists. Women comprise 50% of the EU student population and 45% of doctoral students, but only one third of career researchers are women – a figure that is lower for senior positions.[1]

In 2001, a Wellcome Trust survey concluded that although women were as successful as men in securing funding for biomedical research, they were less likely to apply for grant funds because of their status in scientific institutions and the level of support they received.[2] An analysis of Wellcome Trust awards in 2000-08 revealed a significant gender difference in the amount of funding awarded, even after adjusting for the seniority of the principal investigator, concluding “the most likely explanation for the difference in amounts awarded to women and men is that women are systematically less ambitious in the amounts of funding requested in their grant applications.”[3] In 2011, around 44% of academics in UK universities were women, yet only 39% of senior lecturers and 19% of professors were women.[4] Furthermore, a number of studies from the US have shown that women in science are disadvantaged compared to men.[5–7]

The low numbers of women in science and the reasons for this anomaly is a concern for scientists and policy makers. Although the UK Medical Research Council (MRC) has a gender equality scheme, which briefly states gender equality is reflected in agreements with research organisations receiving MRC funding, it is not clear how the scheme is implemented.[8]

While several initiatives have aimed to increase the numbers of women involved in science, there are no affirmative actions or binding policies in the UK or Europe to definitively ensure women are better represented in science. Indeed, some initiatives aimed at increasing women in science have been criticised. For example, in 2012, the European Commission campaign targeting 13-18 year-old secondary school students[9] was rebuked and described as an insult to women in science[10][11], with the offending video clip removed from the EU campaign website. The effects of campaigns aimed at raising the profile of women in science[12,13] have not been assessed.

We have previously undertaken a systematic analysis of research funding awarded to UK institutions for all infectious disease research, for the 14-year period from 1997 to 2010.[14] Here, we use the dataset gathered for this earlier study to examine trends over time, the distribution of funding awarded to men and women principal investigators (PIs) across specific infections, funder categories, and along the research and development (R&D) continuum, extending from pre-clinical to clinical and operational research.

## Methods

We obtained data from several sources for infectious disease research studies where funding was awarded between 1997 and 2010. The methods for the original study are elaborated in detail elsewhere,[14] and summarised here. We identified 325,922 studies for screening that covered all areas of disease from several funders, and filtered these to identify funding for infectious diseases where the lead institution was in the UK in the period and the year of award 1997-2010. We obtained data from publicly available sources and directly from the funders. We did not include private sector funding in the analysis, as pharmaceutical sector data were not publicly available. Figure 1 shows the sources of data

and the numbers of studies included and excluded at each stage of screening to reach the final set of studies for detailed analysis.

*Figure 1. Methodology flow chart for filtering studies firstly by infectious disease and then by gender*

Data collection and cleaning took place alongside routine duties between 2006 and 2011, primarily by MGH and assisted by JRF, MKC and FBW. Funding records could feasibly be obtained going back to 1997, hence the decision to cover awards during 1997-2010. We assigned each study to primary disease categories, and within each category, we documented topic-specific subsections, including specific pathogen or disease. We allocated studies to one of four categories along the R&D continuum: pre-clinical; phases I, II or III; product development; and operational research, and to one of the 26 categories for funding organisations.

Where the PI was named, we assigned them to men or women categories. The studies where only an initial was available for the forename were assigned as “unclear” if we were unable to establish the PIs gender from a review of the literature, institutional websites or publicly available publications and documents.

Reference to sexually transmitted infections excludes HIV. Neglected tropical diseases were categorised according to classification used by the World Health Organization (WHO) ([http://www.who.int/neglected\\_diseases/diseases/en](http://www.who.int/neglected_diseases/diseases/en)). Antimicrobial resistance includes antibacterial, antiviral, antifungal and antiparasitic studies.

We converted grants awarded in a currency other than pounds sterling to UK pounds using the mean exchange rate in the year of the award. We adjusted grant funding amounts for inflation and reported in 2010 UK pounds.

As well as excluding studies not immediately relevant to infection, we excluded unfunded studies, veterinary infectious disease research studies (unless there was a zoonotic component), those exploring the use of viral vectors to investigate non-communicable diseases, grants for symposia or meetings, or studies with UK contributions (e.g. as a collaborator), but the funding was awarded to a non-UK institution.

We used Microsoft Excel versions 2000 and 2007 to categorise studies. Where needed, data were exported into Microsoft Access (versions 2000 and 2007) and specific keyword queries used to select precise sections of the data for analysis. We used Stata (version 11.0) for statistical analysis and to generate figures.

We used fold differences to compare total investment, number of studies, mean grant, and median grant between men and women according to disease system, specific infection and funding organisation.

We used nonparametric Mann-Whitney rank-sum test to assess the distribution of funding by gender. Nonparametric K-sample test on equality of medians was applied to compare the median funding by gender, and reported as a chi-squared statistic without Yates' correction for continuity. Nonparametric Wilcoxon signed-rank test was applied when comparing matched data, such as time trends by gender. The significance for all tests was defined at the 5% level (two-sided  $P=0.05$ ).

We present differences between gender and do not attempt to investigate or imply bias or inequalities as we could not access data on unsuccessful grant applications.

**Results**

We identified 6165 studies from the 325,922 studies screened that were suitable for inclusion in our analysis. Of these, we were unable to ascertain the gender of principal investigator for 30 studies (0.5%). We excluded 83 studies (1.3%) that did not specify the PIs name or gender – these were funded by the Bill and Melinda Gates Foundation (Gates Foundation) (38 studies; 0.6%) and the UK Department for International Development (DFID) (22 studies; 0.4%), accounting for £321.2 million (12.3% of the total). We included 6052 studies in the final analysis, comprising 4357 grants (72.0%) awarded to men and 1695 grants (28.0%) awarded to women, totalling £2.274 billion, of which £1.786 billion (78.5%) were awarded to men and £488 million (21.5%) awarded to women.

The median value of grant funding was greater for men (£179 389; IQR £59146–£371 977) than for women (£125 556; IQR £30 982–£261 834). Similarly, mean value of the grant funding was greater for men (£409 910; SD £840 087) than for women (£288 011; SD £704 474). Figure 2 shows the distribution of the total investments and median funding awarded to PIs by gender over time.

*Figure 2a. Total investment over time awarded to male and female principal investigators*

*Figure 2b Median investment over time awarded to male and female principal investigators*

**Infectious disease system**

Table 1A (web appendix 1) shows the total investment, total numbers of studies, mean grant funding, median grant funding and fold differences in funding according to nine disease systems and by gender of PI. We identified no infectious disease system where women led the majority of research efforts or were awarded the majority of funding. Median funding awards were greater for male PIs across all infectious disease systems, with the exception of neurological infections and sexually transmitted infections.

Greatest levels of funding awarded to men and to women were for research into respiratory infections and HIV. Men received a total of £312.1 million for research into respiratory infections compared with £84.4 million for women – a 3.70 fold difference – and a total of £290.8 million for HIV research compared with £79.7 million for women – a 3.65 fold difference.

The largest difference between total funding for men and for women was with gastrointestinal infections (5.65 fold difference) where women received only 15.0% of the total investment (£37.0 million) and spearheaded 18.9% (149) of the studies and neurological infections (4.22 fold difference). Smallest difference between total funding for men and for women was in research into sexually transmitted infections (1.90 fold difference), where women received 35.0% (£45.4 million) of the total funding and led 49.0% (182) of the studies.

Mean funding for grants was significantly greater for men (£409 910; SD £840 087) than for women (£288 011; SD £704 474). The differences in median funding were statistically significant ( $P > 0.01$ ) for gastrointestinal infections (men £328 021; SD £458 720) (women £248 615; SD £433 176), for haematological infections (men £417 889; SD £914 626)

(women £306 126; SD £819 910), and for HIV (men £649 216; SD £1 550 920) (women £278 505; SD £545 657).

Median funding for grants showed a similar pattern, with significantly greater grant funding for men (£179 389; IQR £59 146–£371 977) than women (£125 556; IQR £30 983–£261 835). Differences in median funding were statistically significant ( $P > 0.05$ ) for gastrointestinal infections (men £208 369; IQR £78 852–£357 771) (women £155 066; IQR £43 637–£305 928), for hepatic infections (men £118 638; IQR £41 342–£269 629) (women £68 620; IQR £26 720–£221 952), and for HIV (men £163 462; IQR £39 153–£511 800) (women £114 272; IQR £29 880–£305 339).

**Specific Infections**

Table 1B (web appendix 1) shows total investment, total numbers of studies, mean grant funding, median grant funding and fold differences in funding according to specific infection by gender.

Men received significantly higher levels of total research funding, spearheaded greater numbers of studies, and were awarded greater median and mean funding for grants for malaria ( $P = 0.01$ ), HIV ( $P = 0.01$ ) and influenza ( $P = 0.04$ ).

Major differences between total funding for men and for women were observed for research into candida (47.75 fold difference), rotavirus (33.65 fold difference), campylobacter (24.33 fold difference) and norovirus (23.33 fold difference). Smallest differences between total funding for men and women were for research into dengue (1.07 fold difference) and leishmaniasis (1.55 fold difference). Women received greater total funding than men for research into leprosy (0.09 fold difference), diphtheria (0.18 fold difference), chlamydia (0.36 fold difference), syphilis (0.37 fold difference), and varicella zoster (0.54 fold difference).

Differences in mean grant funding were statistically significant ( $P > 0.05$ ) for malaria research (men £590 422; SD £1 324 909) (women £318 054; SD £726 872), for influenza (men £616 643; SD £881 493) (women £387 186; SD £489 997), for respiratory syncytial virus (men £485 283; SD £539 396) (women £187 931; SD £268 412), and for HIV (men £649 216; SD £1 550 920) (women £278 505; SD £545 657).

Differences in median grant funding were statistically significant ( $P > 0.05$ ) for malaria research (men £209 646; IQR £63 826–£529 610) (women £143 358; IQR £42 754–£314 524), for hepatitis C (men £124 797; IQR £42 475–£289 293) (women £67 265; IQR £29 880–£233 467), for influenza (men £348 730; IQR £213 601–£668 561) (women £200 787; IQR £124 210–£398 191), for herpes simplex virus (men £119 295; IQR £40 009–£446 395) (women £309 610; IQR £147 885–£439 305), and for HIV (men £163 462; IQR £39 153–£511 800) (women £114 272; IQR £29 880–£305 339).

Figure 3 shows the proportion of total funding awarded to principal investigators by gender over time and a breakdown of investment by research pipeline. The proportion of the total funding awarded to women ranged from 14.3% (in 1998) to 26.8% (in 2009), with a mean proportion of 21.4% for the period studied. The proportion of funding was lowest for pre-clinical research at 18.2% (£285.5 million of £1.573 billion total) and highest for operational research at 30.9% (£151.4 million of £489.7 million). The funding for clinical (Phase I, II and III) research was 29.9% (£25.5 of £85.2) and for product development amounted to 20.4% (£25.8 million of £126.6 million).

*Figure 3a. Proportion of investment over time awarded to male and female principal investigators*

Figure 3b. Total investment by research pipeline awarded to male and female principal investigators

Funding organisation

Table 2 (web appendix 2) shows in detail the total investment, total numbers of studies, mean grant funding, median grant funding and fold differences in funding according to funding organisation and by gender.

Public funding organisations invested a total of £1.025 billion in research led by men (78.6%) and £279.8 in research led by women (21.4%). Greatest levels of funding awarded to men and to women were by the Wellcome Trust and the UK MRC. Major differences between funding awarded to men and to women PIs were by the BBSRC, with a 6.12 fold difference. Smallest differences between funding awarded to men and to women were by the UK Government funding streams such as the National Institute for Health Research, with a 1.66 fold difference. Mean grant funding from public funding organisations were significantly greater for men at £595 361 (SD £1 080 718) than for women at £448 414 (SD £814 979). Differences were also statistically significant ( $P > 0.01$ ) for UK MRC grants with men at £751 413 (SD £1 020 748) and women at £544 427 (SD £884 442), and for UK Government grants with men at £208 828 (SD £492 519) and women at £182 907 (SD £619 889).

Median grant funding from public funding organisations had a similar pattern with significantly greater grant funding for men at £272 452 (IQR £138 322–£572 529) and women at £213 718 (IQR £92 880–£402 917). Differences were also statistically significant ( $P > 0.05$ ) for UK MRC grants with men at £404 615 (IQR £ 210 068–£811 860) and women at £286 679 (£178 182–£468 998), and for UK Government grants with men at £129 660 (IQR £23 761–£207 320) and women at £59 976 (IQR £12 564–£157 053).

Philanthropic funding organisations invested a total of £691.7 million in research led by men (78.8%) and £185.9 million in research led by women (21.2%).

Mean grant funding from philanthropic funding organisations were significantly greater for men at £338 396 (SD £695 025) than for women at £242 014 (SD £711 420). Differences were also statistically significant ( $P > 0.01$ ) for Wellcome Trust grants with men receiving £393 652 (SD £723 549) and women £230 168 (SD £362 836), and for other charitable funding organisations with men receiving £211 190 (SD £454 108) and women £271 842 (SD £1 208 852).

Median grants from philanthropic funding organisations showed a similar pattern with significantly greater grant funding for men at £153 653 (IQR £58 589 – £302 774) and women at £114 173 (IQR £42 658 – £222 842). Differences were also statistically significant ( $P > 0.05$ ) for Wellcome Trust grants with men receiving £191 461 (IQR £74 759 – £362 424) and women £137 241 (IQR £54 019 – £250 723), and for other charitable funding organisations with men receiving £91 991 (IQR £36 429 – £172 497) and women £76 058 (IQR £17 279 – £150 727).

Figure 4 shows the association between funding organisation and total investment and median funding by gender. The MRC awarded the highest median amount in grants to women (£286 679; IQR £178 182–£468 998), but the median funding amount in grants for men were 1.41 fold higher than that awarded to women (£404 615; IQR £210 068–£811 860). European Commission awarded the highest mean grants to women at £923 364 (SD £1 316 016) however mean funding amount in grants for men were 1.44 fold higher at £1325 149 (SD £2 409 860) than that for women.

*Figure 4a. Association between funding organisation and total investment by gender*

*Figure 4b. Association between funding organisation and median award by gender*

*Time trend*

Table 3 (web appendix 3) shows in detail the trends in funding over time from 1997 to 2010 by gender of principal investigators, with amounts and relative proportions each year of funding. Mean annual funding received was greater by men at £127.6 million (SD £48.7 million) than women at £34.9 million (SD £13.4 million). Proportions of annual funding received by men ranged from 73.2% to 85.7%, with a mean of 78.6%.

Proportions of annual funding received by women ranged from 14.3% to 26.8% with a mean of 21.4%. The largest annual funding received by men was £245.7 million in 2000, and the smallest at £64.2 million in 1997. The largest annual funding received by women was £59.6 million in 2002, with the smallest at £13.1 million in 1998.

Over the 14-year study period, the proportion of investment awarded to women each year remains relatively unchanged with a mean of 21.4% of total (range 14.3%–26.8%; £13.1 million to £59.6 million). Figure 5 shows the funding trends over time and fold differences in total investments by gender. Absolute difference in the funding amounts in the grants awarded to men and women ranges between £47.9 million and £190.1 million, with a mean difference of £92.7 million (SD £38.3 million). Fold difference in grant funding for men and women ranged from 2.74 to 5.97, with a mean fold difference of 3.66.

*Figure 5a. Total investment and trend over time, by gender*

*Figure 5b. Fold difference of investment over time, by gender*

## Discussion

We present the first detailed and systematic comparison by sex of investments in infectious disease research in the UK for the 14-year period 1997-2010. We identified 6165 studies funded by public and philanthropic funding organisations, with total research investment of £2.6 billion.

We quantified the differences in research funding awarded by gender to show these to be substantial. The analysis shows clear and consistent differences between men and women principal investigators, with lower funding in terms of the total investment, the number of funded studies, the median funding awarded and the mean funding awarded across most of the infectious disease areas funded. Women received less funding in absolute amounts and in relative terms, by funder and the type of science funded along the R&D pipeline. These differences in funding between men and women persist over time.

We show large differences in median funding amounts for men and women researchers in investments by the European Commission and the MRC. Such differences were much less apparent when comparing funding from the Department of Health and BBSRC, although the BBSRC awarded 86% of funding to men. The BBSRC almost entirely funds pre-clinical research,[14] and this matches the increased proportions of pre-clinical studies being led by male principal investigators.

Our findings in infectious disease research, the most detailed to date, provide new evidence on differences between men and women researchers, to reinforce the concerns raised in earlier studies.[4,15,16] Differences that are more marked at senior levels of academia need to be investigated to explain and account for the observed differences.

The reasons why the median awards across most infectious disease conditions should be significantly less for women principal investigators cannot be deduced from the available data. Thus, it is not possible to recommend interventions to address this phenomenon, given that it is unclear if there is any bias, or precisely what mechanisms are at play. The next step may be to investigate success rates by gender to assess how many women are applying, and what proportion of the initial request for funding is actually allocated.

There have been suggestions that women are systematically less ambitious in the amounts of funding requested in their grant applications when compared with men who are equivalently ranked academically, and that relatively simple mentoring programmes could at least partially overcome this anomaly.[3] However, there is no evidence supporting these assertions. Others have suggested that systems which ensure PI anonymity during review of grant funding submissions may help reduce the presence of any subtle gender biases[17], though in practice this approach would be challenging as the experience of the PI is a key factor when considering suitability of request for research support. However, evidence on effective interventions to address barriers for women scientists are lacking.[16] Women of child-bearing age are being disadvantaged in some areas of employment, even though in relation to scientific endeavour, productivity as measured by published outputs is not significantly different between women with and without children.[15]

*Study limitations*

Our analysis has several limitations. We rely on the accuracy of the original data from the funding organisations and as described elsewhere we have excluded data from the private sector as the publicly available data are incomplete.[14]

1  
2  
3 In the period analysed, we were not able to find data on the number of men and women PIs  
4 requesting financial support for research agencies from the funding sources studies. Hence,  
5  
6 we were unable to assess the success and failure rates by gender. We also did not have  
7  
8 complete data on the amount of funding initially requested, the gender of co-applicants for  
9  
10 each study, the total pool of researchers in each disease area and within each type of  
11  
12 science, or the proportion of awards made to clinical and non-clinical researchers, all of  
13  
14 which would be useful pieces of information in developing a clearer picture of the reasons for  
15  
16 the presented differences. The proportion of doctors registered in the UK favours men  
17  
18 (56.8% as of January 2013) over women,[18] but the proportion of those carrying out  
19  
20 research appears to be unknown. Understanding the distribution of researchers is critical to  
21  
22 understanding the research landscape.  
23  
24

25  
26  
27  
28 We lacked data on the academic ranking of principal investigators and were hence unable to  
29  
30 adjust for levels of seniority across both genders. We were unable to get data on gender  
31  
32 from the Gates Foundation and DFID and hence were unable to clarify the gender of a small  
33  
34 proportion of investigators, though we believe this limitation is not likely to change the  
35  
36 conclusions of the study. Our analysis focuses on infectious disease research, and analysis  
37  
38 of other areas of scientific research would be needed if these differences persisted for all  
39  
40 research areas.  
41  
42

## 43 44 45 **Conclusions**

46  
47  
48 Notwithstanding limitations, our systematic analysis shows unequal distribution of  
49  
50 investments in infectious disease research for men and women. There are fewer women  
51  
52 receiving funding as principal investigators in infectious disease research, with fewer studies  
53  
54 funded with lower funding amounts when successful.  
55  
56  
57  
58  
59  
60

Although earlier studies have discussed possible solutions, including mentoring programmes and advertising campaigns, none have systematically explored the reasons why such differences persist. Hence, without an understanding of the reasons for the observed differences, the proposed solutions are not very meaningful. There is no evidence that women and men researchers are not equally able, hence, other factors are likely to be at play to explain the observed differences which have persisted over the 14-year study period. From our data, the limitations mean that we cannot explain what these mechanisms might be. Research is needed to elucidate an understanding of the factors that can explain the observed differences. A sub-analysis of our dataset where information on academic rank at time of award is obtained would allow for more meaningful conclusions. We strongly urge policy makers, funders and scientists to urgently investigate the factors leading to the observed differences and develop policies developed to address them, in order to ensure that women are appropriately supported in scientific endeavour.

**Funding**

This research received no specific grant from any funding agency in the public, commercial or not-for-profit sectors

**Author contribution**

MGH designed the study with input from RA and JF and collated the dataset. JRF, FW and MKC checked and refined the dataset. JRF undertook data analysis and created the graphs and figures with input from MGH and RA. MGH, JRF, and RA interpreted the data and wrote the first draft. MGH, JRF, and RA refined the analysis and paper with input from MKC and FBW. All authors reviewed and approved the final version. MH is guarantor of the paper.

**Competing interests**

1  
2  
3 RA has received research funding from the UK Medical Research Council, the UK National  
4  
5 Institute for Health Research, UK CRC, UK EPSRC, the UK Department for International  
6  
7 Development and the UK Department of Health. RA is a member of the UL Medical  
8  
9 Research Council Global Health Group. MGH works for the Infectious Disease Research  
10  
11 Network, which has supported this work and is funded by the UK Department of Health. JRF  
12  
13 has received funds from the Wellcome Trust and is a steering group member for the  
14  
15 Infectious Disease Research Network. MKC has received funding from the Medical  
16  
17 Research Council and the Bill & Melinda Gates Foundation. FBW has received funds from  
18  
19 UCLH Charitable Foundation.  
20

## 21 **Acknowledgements**

22  
23  
24 We thank Jennifer Harris and Raidah Haider for their input and assistance, and acknowledge  
25  
26 the assistance of the research and development funding agencies for provision of data.  
27

## 28 **Data-sharing statement**

29  
30  
31 All gender data is available with this submission. Further data relating to the Research  
32  
33 Investments project can be found at [www.researchinvestments.org](http://www.researchinvestments.org) or by contacting the  
34  
35 corresponding author.  
36  
37  
38  
39  
40  
41  
42  
43  
44  
45  
46  
47  
48  
49  
50  
51  
52  
53  
54  
55  
56  
57  
58  
59  
60

References

1       More women in senior positions. Key to economic stability and growth. European  
2       Commission, Luxembourg: 2010.

3       Blake M, La Valle I. Who applies for research funding? Key factors shaping funding  
4       application behaviour among women and men in British higher education institutions.  
5       London: 2000.

6       Bedi G, Van Dam NT, Munafo M. Gender inequality in awarded research grants.  
7       *Lancet* 2012;**380**:474.

8       Fitzpatrick S. A Survey of Staffing Levels of Medical Clinical Academics in UK Medical  
9       Schools as at 31 July 2011. London: 2012.  
10       [http://www.medschools.ac.uk/Publications/Documents/MS\\_Clinical\\_Academic\\_Staff](http://www.medschools.ac.uk/Publications/Documents/MS_Clinical_Academic_Staff_Survey_310711.pdf)  
11       [\\_Survey\\_310711.pdf](http://www.medschools.ac.uk/Publications/Documents/MS_Clinical_Academic_Staff_Survey_310711.pdf) (date accessed 22 August 2013)

12       Burrelli J. Thirty-Three Years of Women in S&E Faculty Positions - US National  
13       Science Foundation. Arlington: 2008. <http://www.nsf.gov/statistics/infbrief/nsf08308/>  
14       (date accessed 22 August 2013)

15       Lincoln AE, Pincus SH, Leboy PS. Scholars' awards go mainly to men. *Nature*  
16       2011;**469**:472.

17       Pohlhaus JR, Jiang H, Sutton J. Sex differences in career development awardees'  
18       subsequent grant attainment. *Annals of internal medicine* 2010;**152**:616–7; author  
19       reply 617.

20       Medical Research Council. MRC Gender Equality Scheme.  
21       2007.<http://www.mrc.ac.uk/Utilities/Documentrecord/index.htm?d=MRC003655> (date  
22       accessed 22 August 2013).

23       European Commission. About this site- Science: It's a girl thing! 2012. [http://science-](http://science-girl-thing.eu/en/about-this-site)  
24       [girl-thing.eu/en/about-this-site](http://science-girl-thing.eu/en/about-this-site) (date accessed 22 August 2013)

25       Gill M. "Science, it's a girl thing!" says EU Commission, holding lipstick and bunsen  
26       burner. New Statesman. 2012. [http://www.newstatesman.com/blogs/martha-](http://www.newstatesman.com/blogs/martha-gill/2012/06/science-its-girl-thing-says-eu-commission-holding-lipstick-and-bunsen-burn)  
27       [gill/2012/06/science-its-girl-thing-says-eu-commission-holding-lipstick-and-bunsen-](http://www.newstatesman.com/blogs/martha-gill/2012/06/science-its-girl-thing-says-eu-commission-holding-lipstick-and-bunsen-burn)  
28       [burn](http://www.newstatesman.com/blogs/martha-gill/2012/06/science-its-girl-thing-says-eu-commission-holding-lipstick-and-bunsen-burn) (date accessed 22 August 2013).

29       Swain F. Science: It's a girl thing. Excuse me while I die inside. – SciencePunk.  
30       ScienceBlogs. 2012. [http://scienceblogs.com/sciencepunk/2012/06/22/science-its-a-](http://scienceblogs.com/sciencepunk/2012/06/22/science-its-a-girl-thing-excuse-me-while-i-die-inside/)  
31       [girl-thing-excuse-me-while-i-die-inside/](http://scienceblogs.com/sciencepunk/2012/06/22/science-its-a-girl-thing-excuse-me-while-i-die-inside/) (date accessed 22 August 2013)

32       Yong E. Edit-a-thon gets women scientists into Wikipedia. *Nature*. 2012.  
33       [http://www.nature.com/news/edit-a-thon-gets-women-scientists-into-wikipedia-](http://www.nature.com/news/edit-a-thon-gets-women-scientists-into-wikipedia-1.11636)  
34       [1.11636](http://www.nature.com/news/edit-a-thon-gets-women-scientists-into-wikipedia-1.11636) (date accessed 22 August 2013)

35       Donald A. Throw off the cloak of invisibility. *Nature*  
36       2012;**490**:447.<http://www.nature.com/news/throw-off-the-cloak-of-invisibility-1.11638>  
37       (date accessed 22 August 2013).

- 1  
2  
3 14 Head MG, Fitchett JR, Cooke MK, *et al.* UK investments in global infectious disease  
4 research 1997-2010: a case study. *The Lancet infectious diseases* Published Online  
5 First: 7 November 2012.  
6  
7 15 Fox MF. Gender, Family Characteristics, and Publication Productivity among  
8 Scientists. *Social Studies of Science* 2005;**35**:131–50.  
9  
10 16 Ceci SJ, Williams WM. Understanding current causes of women's  
11 underrepresentation in science. *Proceedings of the National Academy of Sciences of*  
12 *the United States of America* 2011;**108**:3157–62.  
13  
14 17 Moss-Racusin CA, Dovidio JF, Brescoll VL, *et al.* Science faculty's subtle gender  
15 biases favor male students. *Proceedings of the National Academy of Sciences of the*  
16 *United States of America* 2012;**109**:16474–9.  
17  
18 18 List of Registered Medical Practitioners - statistics. General Medical Council.  
19 [http://www.gmc-uk.org/doctors/register/search\\_stats.asp](http://www.gmc-uk.org/doctors/register/search_stats.asp) (date accessed 22 August  
20 2013).  
21  
22  
23  
24  
25  
26  
27  
28  
29  
30  
31  
32  
33  
34  
35  
36  
37  
38  
39  
40  
41  
42  
43  
44  
45  
46  
47  
48  
49  
50  
51  
52  
53  
54  
55  
56  
57  
58  
59  
60

1  
2  
3  
4  
5  
6  
7  
8  
9  
10  
11  
12  
13  
14  
15  
16  
17  
18  
19  
20  
21  
22  
23  
24  
25  
26  
27  
28  
29  
30  
31  
32  
33  
34  
35  
36  
37  
38  
39  
40  
41  
42  
43  
44  
45  
46  
47  
48  
49  
50  
51  
52  
53  
54  
55  
56  
57  
58  
59  
60

**Disparities-Differences in research funding for women scientists: a systematic  
analysis-of-comparison-of UK investments in global infectious disease research 1997–  
2010**

Michael G Head<sup>a\*</sup>, Joseph R Fitchett<sup>b</sup>, Mary K Cooke<sup>a</sup>, Fatima B Wurie<sup>a</sup>, Rifat Atun<sup>c</sup>

a University College London, Research Department of Infection and Population Health, UCL  
Royal Free Campus, Rowland Hill Street, London, NW3 2PF

b London School of Hygiene & Tropical Medicine, Keppel Street, London, WC1E 7HT

c Imperial College London, South Kensington Campus, London SW7 2AZ and Harvard  
School of Public Health, Harvard University, Boston, USA

\*Corresponding Author

Number of Words: **3 758**

**Keywords** – gender, funding, research, women,

## Abstract

Objectives: ~~There has not previously been a systematic comparison of awards for research funding in infectious diseases by sex~~ ~~There has not previously been a systematic analysis exploring gender disparities in awards for research funding.~~ We investigated funding awards to UK institutions for all infectious disease research from 1997 to 2010, across disease categories and along the research and development continuum.

Design: Systematic analysis

Methods: Data were obtained from several sources for awards from the period 1997-2010 and each study assigned to - disease categories; type of science (pre-clinical, phases I-III trials, product development, implementation research); categories of funding organisation. Fold differences and statistical analysis were used to compare total investment, study numbers, mean grant, and median grant between men and women.

Results: 6052 studies were included in the final analysis, comprising 4357 grants (72.0%) awarded to men and 1695 grants (28.0%) awarded to women, totalling £2.274 billion. Of this, men received £1.786 billion (78.5%) and women £488 million (21.5%). The median value of award was greater for men (£179 389; IQR £59146–£371 977) than women (£125 556; IQR £30 982–£261 834).

Awards were greater for male PIs across all infectious disease systems, excepting neurological infections and sexually transmitted infections. The proportion of total funding awarded to women ranged from 14.3% in 1998 to 26.8% in 2009 (mean 21.4%), and was lowest for pre-clinical research at 18.2% (£285.5 million of £1.573 billion) and highest for operational research at 30.9% (£151.4 million of £489.7 million).

Conclusions: There are consistent ~~disparities~~ differences in funding received by men and women principal investigators: women have fewer funded studies and receive less funding in

Formatted: Font: (Default) Arial, 11 pt

1  
2  
3  
4  
5  
6  
7  
8  
9  
10  
11  
12  
13  
14  
15  
16  
17  
18  
19  
20  
21  
22  
23  
24  
25  
26  
27  
28  
29  
30  
31  
32  
33  
34  
35  
36  
37  
38  
39  
40  
41  
42  
43  
44  
45  
46  
47  
48  
49  
50  
51  
52  
53  
54  
55  
56  
57  
58  
59  
60

absolute and in relative terms; the median funding awarded to women is lower across most infectious disease areas, by funder, and type of science. These ~~disparities~~ differences remain broadly unchanged over the 14-year study period.

**Article summary**

Article focus

- We explore the distribution of funding across infectious disease research by the gender of principal investigator to identify any ~~disparities~~ differences in funding received by men and women researchers in the UK.

Key messages

- There are consistent ~~disparities~~ differences in funding received by men and women principal investigators (PIs) in infectious disease research funded in the UK.
- Total funding and the median award across most disease areas and type of science is typically greater in male PIs than female PIs
- These ~~disparities~~ differences remain consistent over the time period of analysis (1997-2010)

Strengths and limitations of this study

- This is the first study to present detailed data and rigorously quantify funding ~~disparities~~ differences between men and women researchers in infectious disease research in the UK.
- Our results provides new and additional evidence on ~~disparities~~ differences on funding for men and women researchers highlighted in earlier studies and provides a case for new research to explain the source of these ~~disparities~~ differences,

1  
2  
3  
4  
5  
6 especially given government commitments to increase the number of women in  
7 science  
8  
9

- 10 • We were unable to assess the success and failure rates by gender and thus cannot  
11 comment on the extent of inequalities or bias. As we could not feasibly access data  
12 on the academic ranking of principal investigators, we were hence unable to adjust  
13 for levels of seniority across both genders. A follow-up study incorporating this data  
14 would allow for more meaningful conclusions to be drawn about the nature of any  
15 possible disparities.  
16  
17  
18  
19  
20  
21  
22  
23  
24  
25  
26  
27  
28  
29  
30  
31  
32  
33  
34  
35  
36  
37  
38  
39  
40  
41  
42  
43  
44  
45  
46  
47  
48  
49  
50  
51  
52  
53  
54  
55  
56  
57  
58  
59  
60

1  
2  
3  
4  
5  
6  
7  
8  
9  
10  
11  
12  
13  
14  
15  
16  
17  
18  
19  
20  
21  
22  
23  
24  
25  
26  
27  
28  
29  
30  
31  
32  
33  
34  
35  
36  
37  
38  
39  
40  
41  
42  
43  
44  
45  
46  
47  
48  
49  
50  
51  
52  
53  
54  
55  
56  
57  
58  
59  
60

**Introduction**

Women are under-represented in biomedical science, yet few studies have systematically explored the extent and reasons for the observed ~~disparities~~ differences between men and women scientists. Women comprise 50% of the EU student population and 45% of doctoral students, but only one third of career researchers are women – a figure that is lower for senior positions.[1]

In 2001, a Wellcome Trust survey concluded that although women were as successful as men in securing funding for biomedical research, they were less likely to apply for grant funds because of their status in scientific institutions and the level of support they received.[2] An analysis of Wellcome Trust awards in 2000-08 revealed a significant gender difference in the amount of funding awarded, even after adjusting for the seniority of the principal investigator, concluding “the most likely explanation for the difference in amounts awarded to women and men is that women are systematically less ambitious in the amounts of funding requested in their grant applications.”[3] In 2011, around 44% of academics in UK universities were women, yet only 39% of senior lecturers and 19% of professors were women.[4] Furthermore, a number of studies from the US have shown that women in science are disadvantaged compared to men.[5–7]

The low numbers of women in science and the reasons for this anomaly is a concern for scientists and policy makers. Although the UK Medical Research Council (MRC) has a gender equality scheme, which briefly states gender equality is reflected in agreements with research organisations receiving MRC funding, it is not clear how the scheme is implemented.[8]

While several initiatives have aimed to increase the numbers of women involved in science, there are no affirmative actions or binding policies in the UK or Europe to definitively ensure women are better represented in science. Indeed, some initiatives aimed at increasing women in science have been criticised. For example, in 2012, the European Commission campaign targeting 13-18 year-old secondary school students[9] was rebuked and described as an insult to women in science[10][11], with the offending video clip removed from the EU campaign website. The effects of campaigns aimed at raising the profile of women in science[12,13] have not been assessed.

We have previously undertaken a systematic analysis of research funding awarded to UK institutions for all infectious disease research, for the 14-year period from 1997 to 2010.[14] Here, we use the dataset gathered for this earlier study to examine trends over time, the distribution of funding awarded to men and women principal investigators (PIs) across specific infections, funder categories, and along the research and development (R&D) continuum, extending from pre-clinical to clinical and operational research.

## Methods

We obtained data from several sources for infectious disease research studies where funding was awarded between 1997 and 2010. The methods for the original study are elaborated in detail elsewhere,[14] and summarised here. We identified 325,922 studies for screening that covered all areas of disease from several funders, and filtered these to identify funding for infectious diseases where the lead institution was in the UK in the period and the year of award 1997-2010. We obtained data from publicly available sources and directly from the funders. We did not include private sector funding in the analysis, as pharmaceutical sector data were not publicly available. Figure 1 shows the sources of data

1  
2  
3  
4  
5  
6  
7  
8  
9  
10  
11  
12  
13  
14  
15  
16  
17  
18  
19  
20  
21  
22  
23  
24  
25  
26  
27  
28  
29  
30  
31  
32  
33  
34  
35  
36  
37  
38  
39  
40  
41  
42  
43  
44  
45  
46  
47  
48  
49  
50  
51  
52  
53  
54  
55  
56  
57  
58  
59  
60

and the numbers of studies included and excluded at each stage of screening to reach the final set of studies for detailed analysis.

*Figure 1. Methodology flow chart for filtering studies firstly by infectious disease and then by gender*

Data collection and cleaning took place alongside routine duties between 2006 and 2011, primarily by MGH and assisted by JRF, MKC and FBW. Funding records could feasibly be obtained going back to 1997, hence the decision to cover awards during 1997-2010. We assigned each study to primary disease categories, and within each category, we documented topic-specific subsections, including specific pathogen or disease. We allocated studies to one of four categories along the R&D continuum: pre-clinical; phases I, II or III; product development; and operational research, and to one of the 26 categories for funding organisations.

Where the PI was named, we assigned them to men or women categories. The studies where only an initial was available for the forename were assigned as “unclear” if we were unable to establish the PIs gender from a review of the literature, institutional websites or publicly available publications and documents.

Reference to sexually transmitted infections excludes HIV. Neglected tropical diseases were categorised according to classification used by the World Health Organization (WHO) ([http://www.who.int/neglected\\_diseases/diseases/en](http://www.who.int/neglected_diseases/diseases/en)). Antimicrobial resistance includes antibacterial, antiviral, antifungal and antiparasitic studies.

We converted grants awarded in a currency other than pounds sterling to UK pounds using the mean exchange rate in the year of the award. We adjusted grant funding amounts for inflation and reported in 2010 UK pounds.

As well as excluding studies not immediately relevant to infection, we excluded unfunded studies, veterinary infectious disease research studies (unless there was a zoonotic component), those exploring the use of viral vectors to investigate non-communicable diseases, grants for symposia or meetings, or studies with UK contributions (e.g. as a collaborator), but the funding was awarded to a non-UK institution.

We used Microsoft Excel versions 2000 and 2007 to categorise studies. Where needed, data were exported into Microsoft Access (versions 2000 and 2007) and specific keyword queries used to select precise sections of the data for analysis. We used Stata (version 11.0) for statistical analysis and to generate figures.

We used fold differences to compare total investment, number of studies, mean grant, and median grant between men and women according to disease system, specific infection and funding organisation.

We used nonparametric Mann-Whitney rank-sum test to assess the distribution of funding by gender. Nonparametric K-sample test on equality of medians was applied to compare the median funding by gender, and reported as a chi-squared statistic without Yates' correction for continuity. Nonparametric Wilcoxon signed-rank test was applied when comparing matched data, such as time trends by gender. The significance for all tests was defined at the 5% level (two-sided  $P=0.05$ ).

1  
2  
3  
4  
5  
6  
7  
8  
9  
10  
11  
12  
13  
14  
15  
16  
17  
18  
19  
20  
21  
22  
23  
24  
25  
26  
27  
28  
29  
30  
31  
32  
33  
34  
35  
36  
37  
38  
39  
40  
41  
42  
43  
44  
45  
46  
47  
48  
49  
50  
51  
52  
53  
54  
55  
56  
57  
58  
59  
60

We present ~~disparities~~ differences between gender and do not attempt to investigate or imply bias or inequalities as we could not access data on unsuccessful grant applications.

**Results**

We identified 6165 studies from the 325,922 studies screened that were suitable for inclusion in our analysis. Of these, we were unable to ascertain the gender of principal investigator for 30 studies (0.5%). We excluded 83 studies (1.3%) that did not specify the PIs name or gender – these were funded by the Bill and Melinda Gates Foundation (Gates Foundation) (38 studies; 0.6%) and the UK Department for International Development (DFID) (22 studies; 0.4%), accounting for £321.2 million (12.3% of the total). We included 6052 studies in the final analysis, comprising 4357 grants (72.0%) awarded to men and 1695 grants (28.0%) awarded to women, totalling £2.274 billion, of which £1.786 billion (78.5%) were awarded to men and £488 million (21.5%) awarded to women.

The median value of grant funding was greater for men (£179 389; IQR £59146–£371 977) than for women (£125 556; IQR £30 982–£261 834). Similarly, mean value of the grant funding was greater for men (£409 910; SD £840 087) than for women (£288 011; SD £704 474). Figure 2 shows the distribution of the total investments and median funding awarded to PIs by gender over time.

*Figure 2a. Total investment over time awarded to male and female principal investigators*

*Figure 2b Median investment over time awarded to male and female principal investigators*

**Infectious disease system**

Table 1A (web appendix 1) shows the total investment, total numbers of studies, mean grant funding, median grant funding and fold differences in funding according to nine disease systems and by gender of PI. We identified no infectious disease system where women led the majority of research efforts or were awarded the majority of funding. Median funding awards were greater for male PIs across all infectious disease systems, with the exception of neurological infections and sexually transmitted infections.

Greatest levels of funding awarded to men and to women were for research into respiratory infections and HIV. Men received a total of £312.1 million for research into respiratory infections compared with £84.4 million for women – a 3.70 fold difference – and a total of £290.8 million for HIV research compared with £79.7 million for women – a 3.65 fold difference.

The largest difference between total funding for men and for women was with gastrointestinal infections (5.65 fold difference) where women received only 15.0% of the total investment (£37.0 million) and spearheaded 18.9% (149) of the studies and neurological infections (4.22 fold difference). Smallest difference between total funding for men and for women was in research into sexually transmitted infections (1.90 fold difference), where women received 35.0% (£45.4 million) of the total funding and led 49.0% (182) of the studies.

Mean funding for grants was significantly greater for men (£409 910; SD £840 087) than for women (£288 011; SD £704 474). The differences in median funding were statistically significant ( $P > 0.01$ ) for gastrointestinal infections (men £328 021; SD £458 720) (women £248 615; SD £433 176), for haematological infections (men £417 889; SD £914 626)

1  
2  
3  
4  
5  
6  
7  
8  
9  
10  
11  
12  
13  
14  
15  
16  
17  
18  
19  
20  
21  
22  
23  
24  
25  
26  
27  
28  
29  
30  
31  
32  
33  
34  
35  
36  
37  
38  
39  
40  
41  
42  
43  
44  
45  
46  
47  
48  
49  
50  
51  
52  
53  
54  
55  
56  
57  
58  
59  
60

(women £306 126; SD £819 910), and for HIV (men £649 216; SD £1 550 920) (women £278 505; SD £545 657).

Median funding for grants showed a similar pattern, with significantly greater grant funding for men (£179 389; IQR £59 146–£371 977) than women (£125 556; IQR £30 983–£261 835). Differences in median funding were statistically significant ( $P > 0.05$ ) for gastrointestinal infections (men £208 369; IQR £78 852–£357 771) (women £155 066; IQR £43 637–£305 928), for hepatic infections (men £118 638; IQR £41 342–£269 629) (women £68 620; IQR £26 720–£221 952), and for HIV (men £163 462; IQR £39 153–£511 800) (women £114 272; IQR £29 880–£305 339).

**Specific Infections**

Table 1B (web appendix 1) shows total investment, total numbers of studies, mean grant funding, median grant funding and fold differences in funding according to specific infection by gender.

Men received significantly higher levels of total research funding, spearheaded greater numbers of studies, and were awarded greater median and mean funding for grants for malaria ( $P = 0.01$ ), HIV ( $P = 0.01$ ) and influenza ( $P = 0.04$ ).

Major differences between total funding for men and for women were observed for research into candida (47.75 fold difference), rotavirus (33.65 fold difference), campylobacter (24.33 fold difference) and norovirus (23.33 fold difference). Smallest differences between total funding for men and women were for research into dengue (1.07 fold difference) and leishmaniasis (1.55 fold difference). Women received greater total funding than men for research into leprosy (0.09 fold difference), diphtheria (0.18 fold difference), chlamydia (0.36 fold difference), syphilis (0.37 fold difference), and varicella zoster (0.54 fold difference).

Differences in mean grant funding were statistically significant ( $P > 0.05$ ) for malaria research (men £590 422; SD £1 324 909) (women £318 054; SD £726 872), for influenza (men £616 643; SD £881 493) (women £387 186; SD £489 997), for respiratory syncytial virus (men £485 283; SD £539 396) (women £187 931; SD £268 412), and for HIV (men £649 216; SD £1 550 920) (women £278 505; SD £545 657).

Differences in median grant funding were statistically significant ( $P > 0.05$ ) for malaria research (men £209 646; IQR £63 826–£529 610) (women £143 358; IQR £42 754–£314 524), for hepatitis C (men £124 797; IQR £42 475–£289 293) (women £67 265; IQR £29 880–£233 467), for influenza (men £348 730; IQR £213 601–£668 561) (women £200 787; IQR £124 210–£398 191), for herpes simplex virus (men £119 295; IQR £40 009–£446 395) (women £309 610; IQR £147 885–£439 305), and for HIV (men £163 462; IQR £39 153–£511 800) (women £114 272; IQR £29 880–£305 339).

Figure 3 shows the proportion of total funding awarded to principal investigators by gender over time and a breakdown of investment by research pipeline. The proportion of the total funding awarded to women ranged from 14.3% (in 1998) to 26.8% (in 2009), with a mean proportion of 21.4% for the period studied. The proportion of funding was lowest for pre-clinical research at 18.2% (£285.5 million of £1.573 billion total) and highest for operational research at 30.9% (£151.4 million of £489.7 million). The funding for clinical (Phase I, II and III) research was 29.9% (£25.5 of £85.2) and for product development amounted to 20.4% (£25.8 million of £126.6 million).

*Figure 3a. Proportion of investment over time awarded to male and female principal investigators*

1  
2  
3  
4  
5  
6  
7  
8  
9  
10  
11  
12  
13  
14  
15  
16  
17  
18  
19  
20  
21  
22  
23  
24  
25  
26  
27  
28  
29  
30  
31  
32  
33  
34  
35  
36  
37  
38  
39  
40  
41  
42  
43  
44  
45  
46  
47  
48  
49  
50  
51  
52  
53  
54  
55  
56  
57  
58  
59  
60

*Figure 3b. Total investment by research pipeline awarded to male and female principal investigators*

**Funding organisation**

Table 2 (web appendix 2) shows in detail the total investment, total numbers of studies, mean grant funding, median grant funding and fold differences in funding according to funding organisation and by gender.

Public funding organisations invested a total of £1.025 billion in research led by men (78.6%) and £279.8 in research led by women (21.4%). Greatest levels of funding awarded to men and to women were by the Wellcome Trust and the UK MRC. Major differences between funding awarded to men and to women PIs were by the BBSRC, with a 6.12 fold difference. Smallest differences between funding awarded to men and to women were by the UK Government funding streams such as the National Institute for Health Research, with a 1.66 fold difference. Mean grant funding from public funding organisations were significantly greater for men at £595 361 (SD £1 080 718) than for women at £448 414 (SD £814 979). Differences were also statistically significant ( $P > 0.01$ ) for UK MRC grants with men at £751 413 (SD £1 020 748) and women at £544 427 (SD £884 442), and for UK Government grants with men at £208 828 (SD £492 519) and women at £182 907 (SD £619 889).

Median grant funding from public funding organisations had a similar pattern with significantly greater grant funding for men at £272 452 (IQR £138 322–£572 529) and women at £213 718 (IQR £92 880–£402 917). Differences were also statistically significant ( $P > 0.05$ ) for UK MRC grants with men at £404 615 (IQR £ 210 068–£811 860) and women at £286 679 (£178 182–£468 998), and for UK Government grants with men at £129 660 (IQR £23 761–£207 320) and women at £59 976 (IQR £12 564–£157 053).

Philanthropic funding organisations invested a total of £691.7 million in research led by men (78.8%) and £185.9 million in research led by women (21.2%).

Mean grant funding from philanthropic funding organisations were significantly greater for men at £338 396 (SD £695 025) than for women at £242 014 (SD £711 420). Differences were also statistically significant ( $P > 0.01$ ) for Wellcome Trust grants with men receiving £393 652 (SD £723 549) and women £230 168 (SD £362 836), and for other charitable funding organisations with men receiving £211 190 (SD £454 108) and women £271 842 (SD £1 208 852).

Median grants from philanthropic funding organisations showed a similar pattern with significantly greater grant funding for men at £153 653 (IQR £58 589 – £302 774) and women at £114 173 (IQR £42 658 – £222 842). Differences were also statistically significant ( $P > 0.05$ ) for Wellcome Trust grants with men receiving £191 461 (IQR £74 759 – £362 424) and women £137 241 (IQR £54 019 – £250 723), and for other charitable funding organisations with men receiving £91 991 (IQR £36 429 – £172 497) and women £76 058 (IQR £17 279 – £150 727).

Figure 4 shows the association between funding organisation and total investment and median funding by gender. The MRC awarded the highest median amount in grants to women (£286 679; IQR £178 182–£468 998), but the median funding amount in grants for men were 1.41 fold higher than that awarded to women (£404 615; IQR £210 068–£811 860). European Commission awarded the highest mean grants to women at £923 364 (SD £1 316 016) however mean funding amount in grants for men were 1.44 fold higher at £1325 149 (SD £2 409 860) than that for women.

1  
2  
3  
4  
5  
6  
7  
8  
9  
10  
11  
12  
13  
14  
15  
16  
17  
18  
19  
20  
21  
22  
23  
24  
25  
26  
27  
28  
29  
30  
31  
32  
33  
34  
35  
36  
37  
38  
39  
40  
41  
42  
43  
44  
45  
46  
47  
48  
49  
50  
51  
52  
53  
54  
55  
56  
57  
58  
59  
60

*Figure 4a. Association between funding organisation and total investment by gender*

*Figure 4b. Association between funding organisation and median award by gender*

*Time trend*

Table 3 (web appendix 3) shows in detail the trends in funding over time from 1997 to 2010 by gender of principal investigators, with amounts and relative proportions each year of funding. Mean annual funding received was greater by men at £127.6 million (SD £48.7 million) than women at £34.9 million (SD £13.4 million). Proportions of annual funding received by men ranged from 73.2% to 85.7%, with a mean of 78.6%.

Proportions of annual funding received by women ranged from 14.3% to 26.8% with a mean of 21.4%. The largest annual funding received by men was £245.7 million in 2000, and the smallest at £64.2 million in 1997. The largest annual funding received by women was £59.6 million in 2002, with the smallest at £13.1 million in 1998.

Over the 14-year study period, the proportion of investment awarded to women each year remains relatively unchanged with a mean of 21.4% of total (range 14.3%–26.8%; £13.1 million to £59.6 million). Figure 5 shows the funding trends over time and fold differences in total investments by gender. Absolute difference in the funding amounts in the grants awarded to men and women ranges between £47.9 million and £190.1 million, with a mean difference of £92.7 million (SD £38.3 million). Fold difference in grant funding for men and women ranged from 2.74 to 5.97, with a mean fold difference of 3.66.

*Figure 5a. Total investment and trend over time, by gender*

*Figure 5b. Fold difference of investment over time, by gender*

## Discussion

We present the first detailed and systematic analysis-comparison by gender-sex of investments in infectious disease research in the UK for the 14-year period 1997-2010. We identified 6165 studies funded by public and philanthropic funding organisations, with total research investment of £2.6 billion.

We quantified the differences in research funding awarded by gender to show these to be substantial. The analysis shows clear and consistent disparities-differences between men and women principal investigators, with lower funding in terms of the total investment, the number of funded studies, the median funding awarded and the mean funding awarded across most of the infectious disease areas funded. Women received less funding in absolute amounts and in relative terms, by funder and the type of science funded along the R&D pipeline. These disparities-differences in funding between men and women persist over time.

We show large disparities-differences in median funding amounts for men and women researchers in investments by the European Commission and the MRC. Such differences were much less apparent when comparing funding from the Department of Health and BBSRC, although the BBSRC awarded 86% of funding to men. The BBSRC almost entirely funds pre-clinical research,[14] and this matches the increased proportions of pre-clinical studies being led by male principal investigators.

Our findings in infectious disease research, the most detailed to date, provide new evidence on disparities-differences between men and women researchers, to reinforce the concerns raised in earlier studies.[4,15,16] Disparities-Differences that are more marked at senior

1  
2  
3  
4  
5  
6  
7  
8  
9  
10  
11  
12  
13  
14  
15  
16  
17  
18  
19  
20  
21  
22  
23  
24  
25  
26  
27  
28  
29  
30  
31  
32  
33  
34  
35  
36  
37  
38  
39  
40  
41  
42  
43  
44  
45  
46  
47  
48  
49  
50  
51  
52  
53  
54  
55  
56  
57  
58  
59  
60

levels of academia need to be investigated to explain and account for the observed differences.

The reasons why the median awards across most infectious disease conditions should be significantly less for women principal investigators cannot be deduced from the available data. Thus, it is not possible to recommend interventions to address this phenomenon, given that it is unclear if there is any bias, or precisely what mechanisms are at play. The next step may be to investigate success rates by gender to assess how many women are applying, and what proportion of the initial request for funding is actually allocated.

Formatted: Font: (Default) Arial, 11 pt

Formatted: Font: (Default) Arial, 11 pt

There have been suggestions that women are systematically less ambitious in the amounts of funding requested in their grant applications when compared with men who are equivalently ranked academically, and that relatively simple mentoring programmes could at least partially overcome this anomaly.[3] However, there is no evidence supporting these assertions. Others have suggested that systems which ensure PI anonymity during review of grant funding submissions may help reduce the presence of any subtle gender biases[17], though in practice this approach would be challenging as the experience of the PI is a key factor when considering suitability of request for research support. However, evidence on effective interventions to address barriers for women scientists are lacking.[16] Women of child-bearing age are being disadvantaged in some areas of employment, even though in relation to scientific endeavour, productivity as measured by published outputs is not significantly different between women with and without children.[15]

*Study limitations*

Our analysis has several limitations. We rely on the accuracy of the original data from the funding organisations and as described elsewhere we have excluded data from the private sector as the publicly available data are incomplete.[14]

In the period analysed, we were not able to find data on the number of men and women PIs requesting financial support for research agencies from the funding sources studies. Hence, we were unable to assess the success and failure rates by gender. We also did not have complete data on the amount of funding initially requested, the gender of co-applicants for each study, the total pool of researchers in each disease area and within each type of science, or the proportion of awards made to clinical and non-clinical researchers, all of which would be useful pieces of information in developing a clearer picture of the reasons for the presented differences. The proportion of doctors registered in the UK favours men (56.8% as of January 2013) over women,[18] but the proportion of those carrying out research appears to be unknown. Understanding the distribution of researchers is critical to understanding the research landscape.

We lacked data on the academic ranking of principal investigators and were hence unable to adjust for levels of seniority across both genders. We were unable to get data on gender from the Gates Foundation and DFID and hence were unable to clarify the gender of a small proportion of investigators, though we believe this limitation is not likely to change the conclusions of the study. Our analysis focuses on infectious disease research, and analysis of other areas of scientific research would be needed if these ~~disparities-differences~~ persisted for all research areas.

## Conclusions

1  
2  
3  
4  
5  
6  
7  
8  
9  
10  
11  
12  
13  
14  
15  
16  
17  
18  
19  
20  
21  
22  
23  
24  
25  
26  
27  
28  
29  
30  
31  
32  
33  
34  
35  
36  
37  
38  
39  
40  
41  
42  
43  
44  
45  
46  
47  
48  
49  
50  
51  
52  
53  
54  
55  
56  
57  
58  
59  
60

Notwithstanding limitations, our systematic analysis shows unequal distribution of investments in infectious disease research for men and women. There are fewer women receiving funding as principal investigators in infectious disease research, with fewer studies funded with lower funding amounts when successful.

Although earlier studies have discussed possible solutions, including mentoring programmes and advertising campaigns, none have systematically explored the reasons why such differences persist. Hence, without an understanding of the reasons for the observed ~~disparities~~differences, the proposed solutions are not very meaningful. There is no evidence that women and men researchers are not equally able, hence, other factors are likely to be at play to explain the observed ~~disparities~~differences which have persisted over the 14-year study period. From our data, the limitations mean that we cannot explain what these mechanisms might be. Research is needed to elucidate an understanding of the factors that can explain the observed ~~disparities~~differences. A sub-analysis of our dataset where information on academic rank at time of award is obtained would allow for more meaningful conclusions. We strongly urge policy makers, funders and scientists to urgently investigate the factors leading to the observed ~~disparities~~differences and develop policies developed to address them, in order to ensure that women are appropriately supported in scientific endeavour.

**Funding**

This research received no specific grant from any funding agency in the public, commercial or not-for-profit sectors

**Author contribution**

MGH designed the study with input from RA and JF and collated the dataset. JRF, FW and MKC checked and refined the dataset. JRF undertook data analysis and created the graphs and figures with input from MGH and RA. MGH, JRF, and RA interpreted the data and wrote the first draft. MGH, JRF, and RA refined the analysis and paper with input from MKC and FBW. All authors reviewed and approved the final version. MH is guarantor of the paper.

### Competing interests

RA has received research funding from the UK Medical Research Council, the UK National Institute for Health Research, UK CRC, UK EPSRC, the UK Department for International Development and the UK Department of Health. RA is a member of the UL Medical Research Council Global Health Group. MGH works for the Infectious Disease Research Network, which has supported this work and is funded by the UK Department of Health. JRF has received funds from the Wellcome Trust and is a steering group member for the Infectious Disease Research Network. MKC has received funding from the Medical Research Council and the Bill & Melinda Gates Foundation. FBW has received funds from UCLH Charitable Foundation.

### Acknowledgements

We thank Jennifer Harris and Raidah Haider for their input and assistance, and acknowledge the assistance of the research and development funding agencies for provision of data.

### Data-sharing statement

All gender data is available with this submission. Further data relating to the Research Investments project can be found at [www.researchinvestments.org](http://www.researchinvestments.org) or by contacting the corresponding author.

References

1 More women in senior positions. Key to economic stability and growth. European Commission, Luxembourg: 2010.

2 Blake M, La Valle I. Who applies for research funding? Key factors shaping funding application behaviour among women and men in British higher education institutions. London: 2000.

3 Bedi G, Van Dam NT, Munafo M. Gender inequality in awarded research grants. *Lancet* 2012;**380**:474.

4 Fitzpatrick S. A Survey of Staffing Levels of Medical Clinical Academics in UK Medical Schools as at 31 July 2011. London: 2012. [http://www.medschools.ac.uk/Publications/Documents/MSC\\_Clinical\\_Academic\\_Staff\\_Survey\\_310711.pdf](http://www.medschools.ac.uk/Publications/Documents/MSC_Clinical_Academic_Staff_Survey_310711.pdf) (date accessed 22 August 2013)

5 Burrelli J. Thirty-Three Years of Women in S&E Faculty Positions - US National Science Foundation. Arlington: 2008. <http://www.nsf.gov/statistics/infbrief/nsf08308/> (date accessed 22 August 2013)

6 Lincoln AE, Pincus SH, Leboy PS. Scholars' awards go mainly to men. *Nature* 2011;**469**:472.

7 Pohlhaus JR, Jiang H, Sutton J. Sex differences in career development awardees' subsequent grant attainment. *Annals of internal medicine* 2010;**152**:616–7; author reply 617.

8 Medical Research Council. MRC Gender Equality Scheme. 2007. <http://www.mrc.ac.uk/Utilities/Documentrecord/index.htm?d=MRC003655> (date accessed 22 August 2013).

9 European Commission. About this site- Science: It's a girl thing! 2012. <http://science-girl-thing.eu/en/about-this-site> (date accessed 22 August 2013)

10 Gill M. "Science, it's a girl thing!" says EU Commission, holding lipstick and bunsen burner. *New Statesman*. 2012. <http://www.newstatesman.com/blogs/martha-gill/2012/06/science-its-girl-thing-says-eu-commission-holding-lipstick-and-bunsen-burn> (date accessed 22 August 2013).

11 Swain F. Science: It's a girl thing. Excuse me while I die inside. – SciencePunk. ScienceBlogs. 2012. <http://scienceblogs.com/sciencepunk/2012/06/22/science-its-a-girl-thing-excuse-me-while-i-die-inside/> (date accessed 22 August 2013)

12 Yong E. Edit-a-thon gets women scientists into Wikipedia. *Nature*. 2012. <http://www.nature.com/news/edit-a-thon-gets-women-scientists-into-wikipedia-1.11636> (date accessed 22 August 2013)

13 Donald A. Throw off the cloak of invisibility. *Nature* 2012;**490**:447. <http://www.nature.com/news/throw-off-the-cloak-of-invisibility-1.11638> (date accessed 22 August 2013).

- 1  
2  
3  
4  
5  
6  
7 14 Head MG, Fitchett JR, Cooke MK, *et al.* UK investments in global infectious disease  
8 research 1997-2010: a case study. *The Lancet infectious diseases* Published Online  
9 First: 7 November 2012.
- 10 15 Fox MF. Gender, Family Characteristics, and Publication Productivity among  
11 Scientists. *Social Studies of Science* 2005;**35**:131–50.
- 12  
13 16 Ceci SJ, Williams WM. Understanding current causes of women's  
14 underrepresentation in science. *Proceedings of the National Academy of Sciences of*  
15 *the United States of America* 2011;**108**:3157–62.
- 16  
17 17 Moss-Racusin CA, Dovidio JF, Brescoll VL, *et al.* Science faculty's subtle gender  
18 biases favor male students. *Proceedings of the National Academy of Sciences of the*  
19 *United States of America* 2012;**109**:16474–9.
- 20 18 List of Registered Medical Practitioners - statistics. General Medical Council.  
21 [http://www.gmc-uk.org/doctors/register/search\\_stats.asp](http://www.gmc-uk.org/doctors/register/search_stats.asp) (date accessed 22 August  
22 2013).
- 23  
24  
25  
26  
27  
28  
29  
30  
31  
32  
33  
34  
35  
36  
37  
38  
39  
40  
41  
42  
43  
44  
45  
46  
47  
48  
49  
50  
51  
52  
53  
54  
55  
56  
57  
58  
59  
60

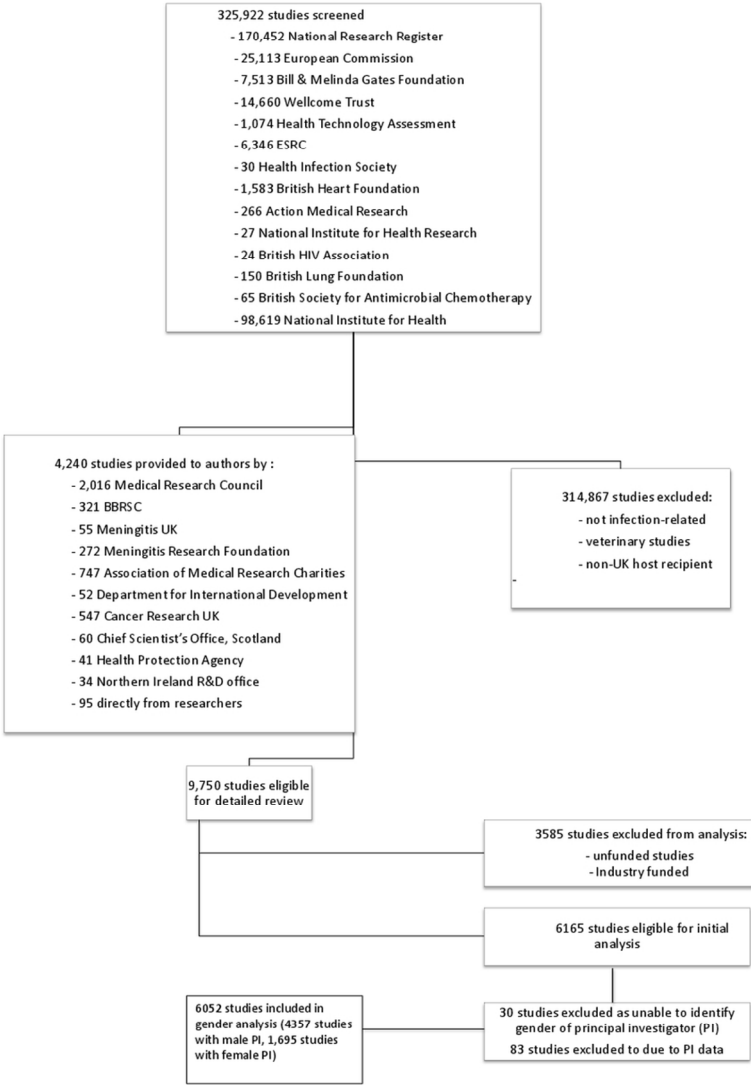

Figure 1. Methodology flow chart  
90x119mm (300 x 300 DPI)

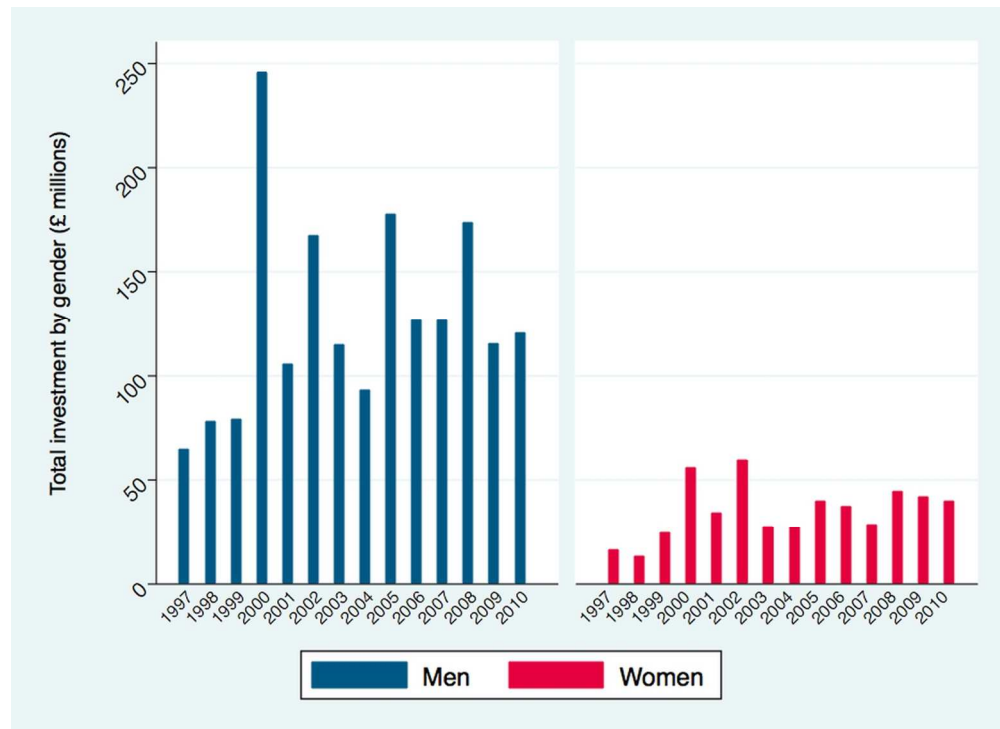

Figure 2a. Total investment over time awarded to male and female principal investigators  
123x90mm (300 x 300 DPI)

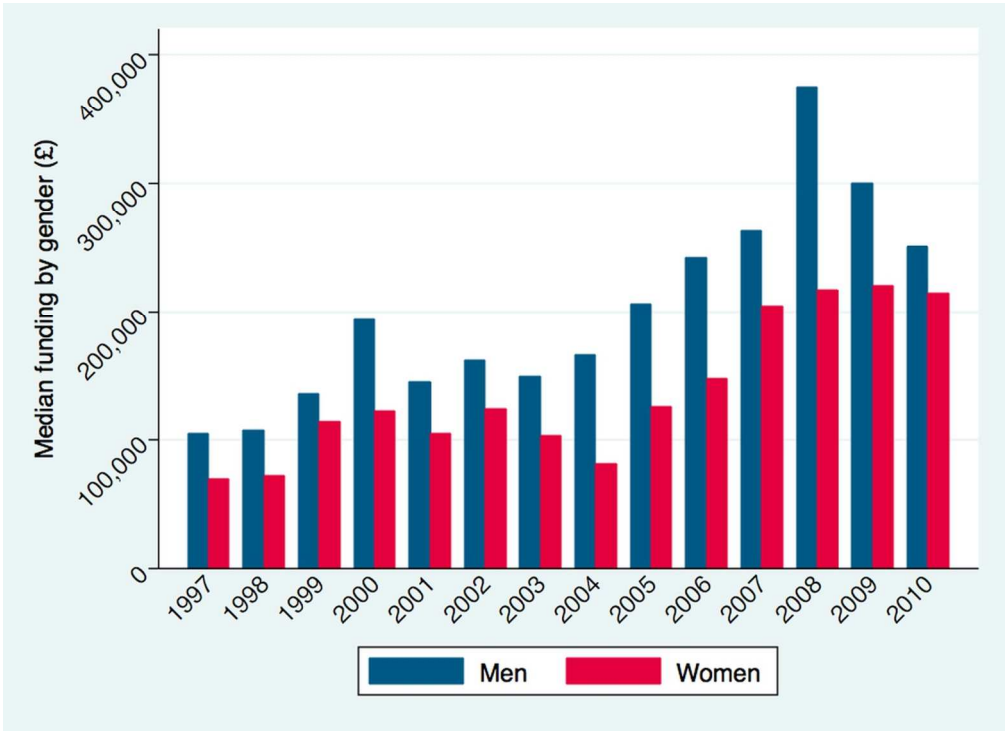

Figure 2b Median investment over time awarded to male and female principal investigators  
123x90mm (300 x 300 DPI)

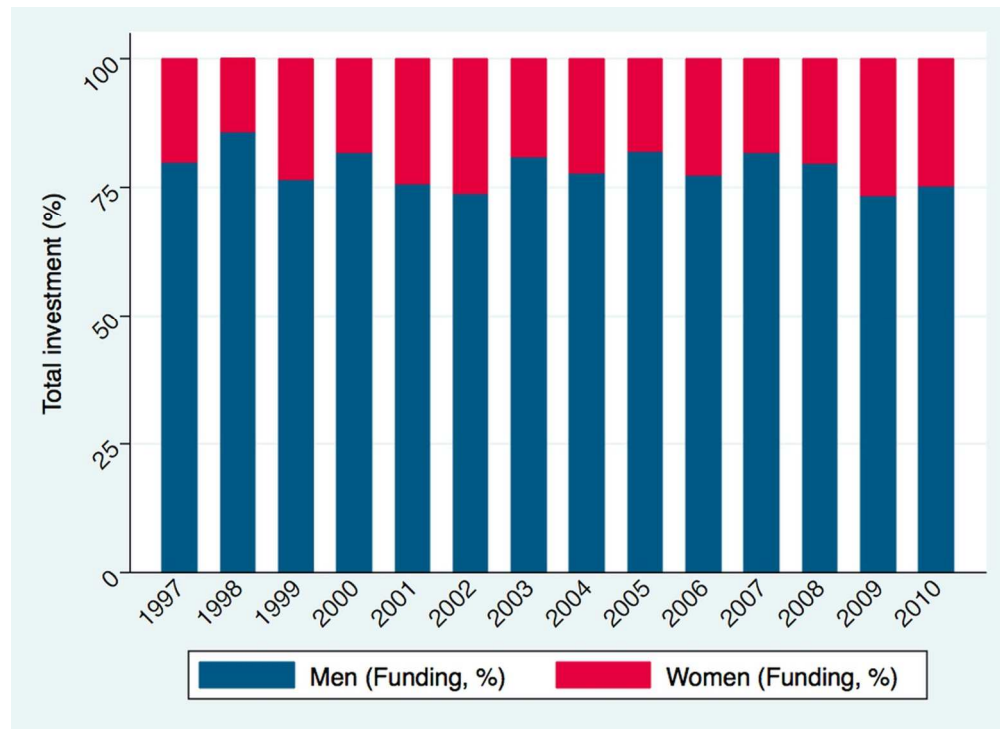

Figure 3a. Proportion of investment over time awarded to male and female principal investigators  
123x90mm (300 x 300 DPI)

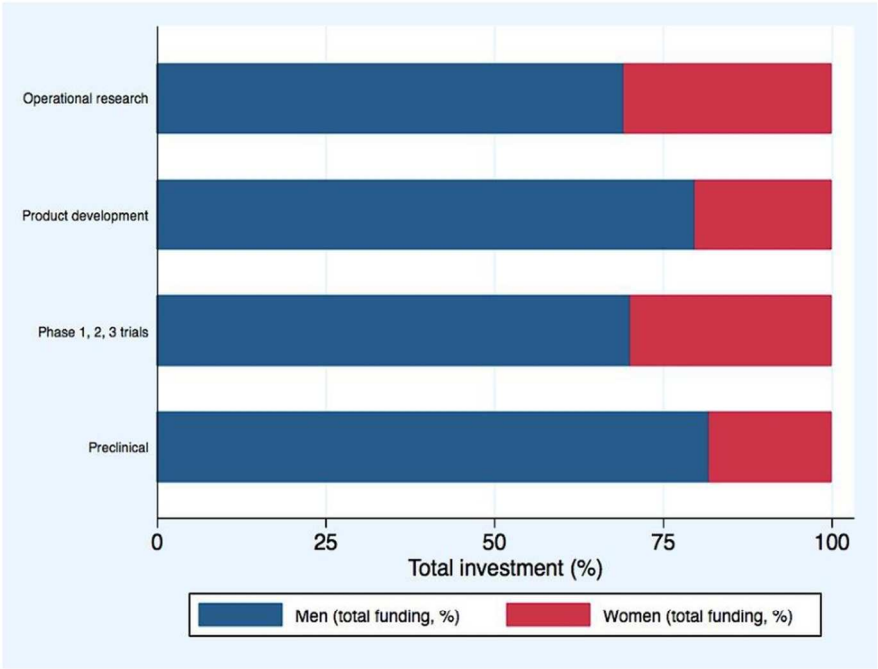

119x90mm (300 x 300 DPI)

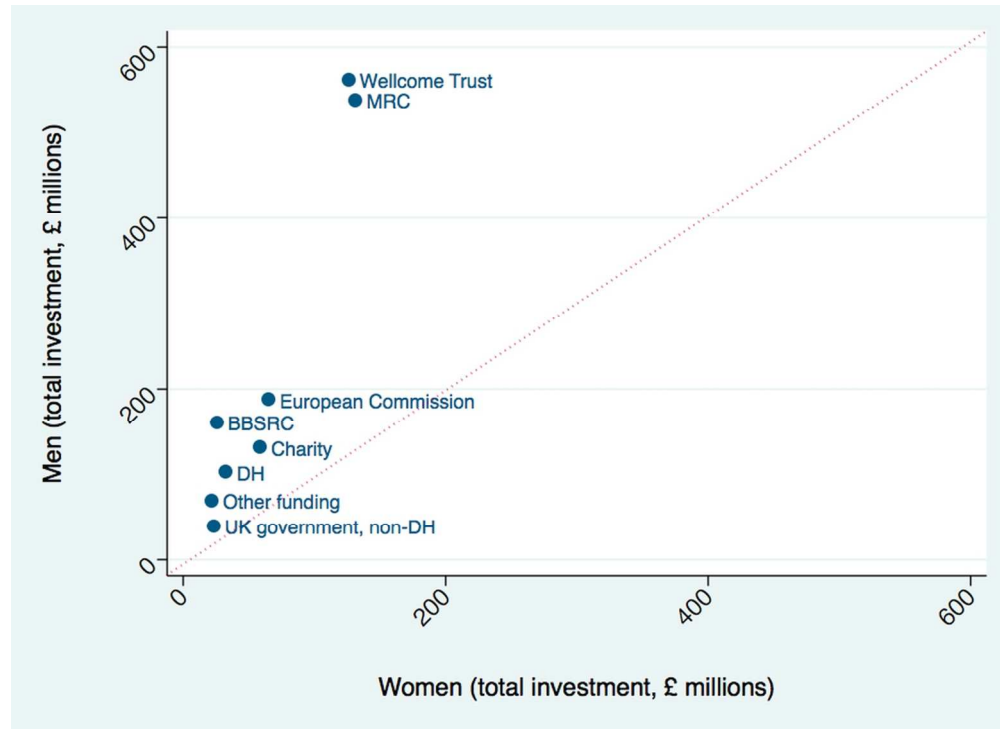

123x90mm (300 x 300 DPI)

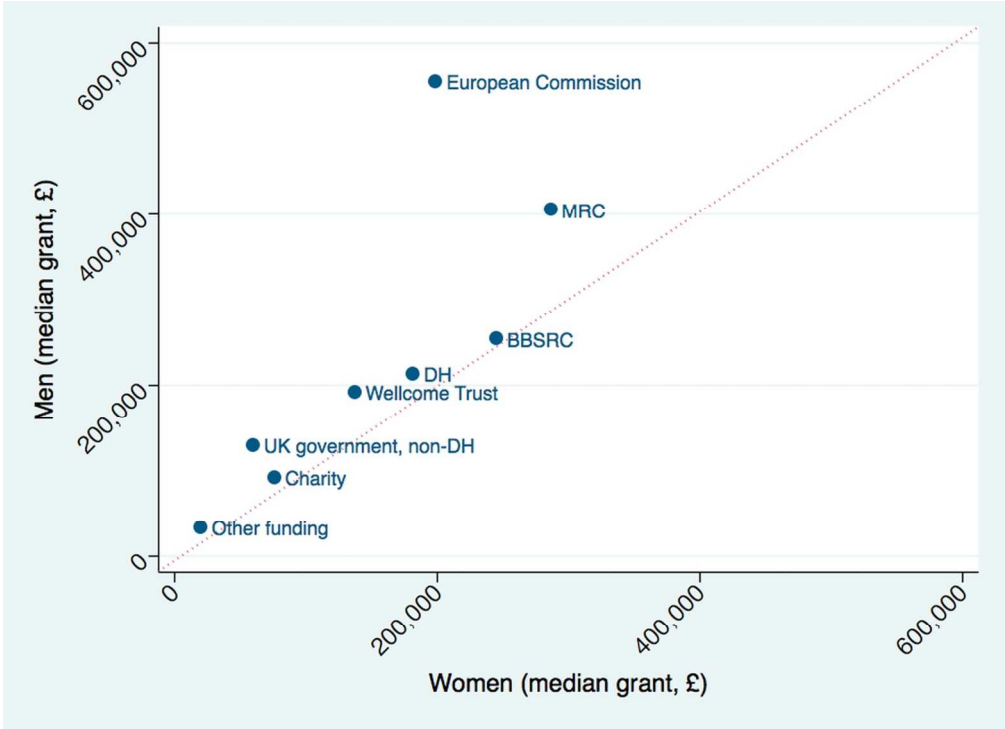

123x90mm (300 x 300 DPI)

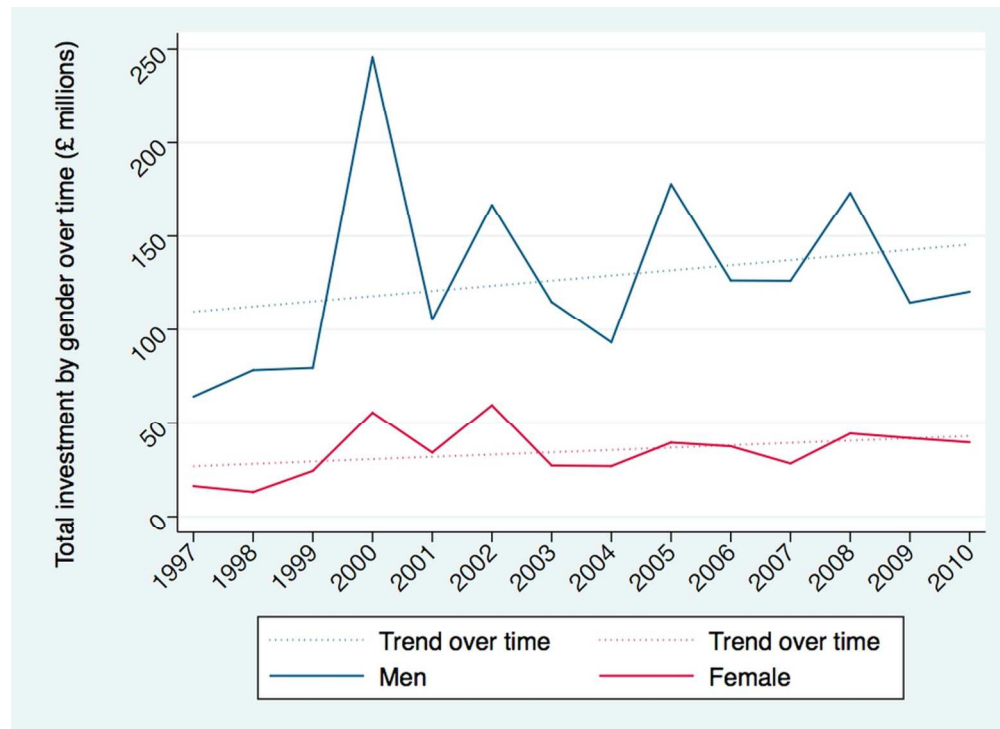

123x90mm (300 x 300 DPI)

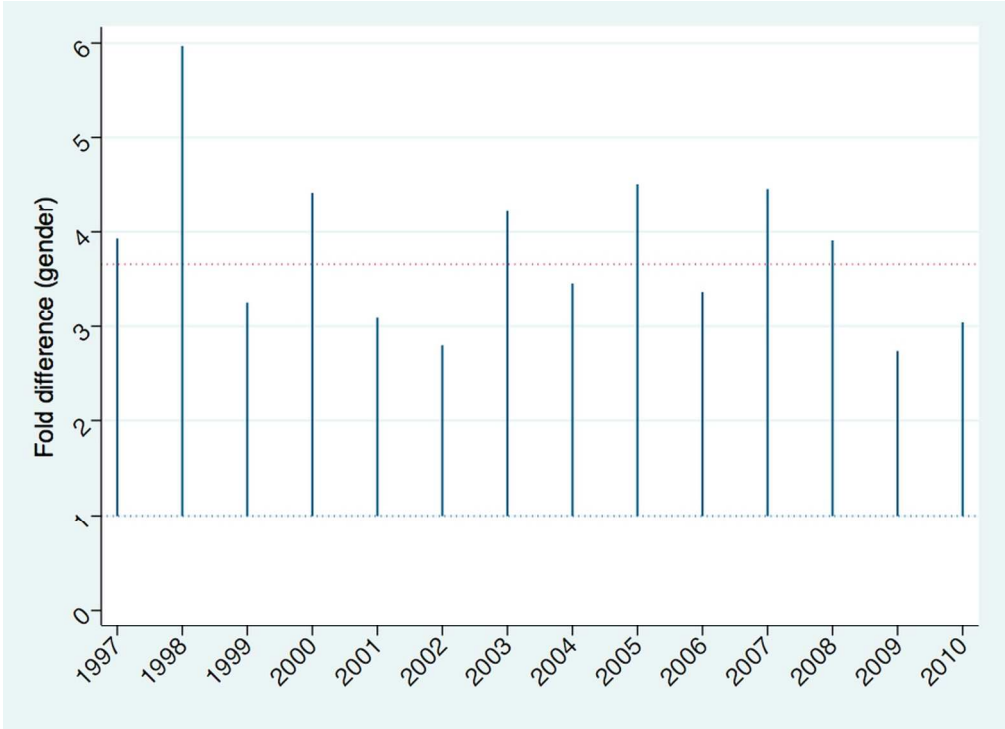

Figure 5b. Fold difference of investment over time, by gender  
123x90mm (300 x 300 DPI)







|                           |               |               |             |         |       |         |         |         |           |           |         |       |      |                 |                |                 |      |       |      |
|---------------------------|---------------|---------------|-------------|---------|-------|---------|---------|---------|-----------|-----------|---------|-------|------|-----------------|----------------|-----------------|------|-------|------|
| Gonorrhoea                | 948,399       | 669,866       | 278,532     | 2.40    | 18    | 9       | 9       | 1.00    | 52,689    | 74,430    | 30,948  | 2.40  | 0.51 | 7,548           | 8,149          | 6,525           | 1.25 | 0.22  | 0.64 |
|                           | #VALUE!       | 70.6%         | 29.4%       |         | 0.5%  | 50.0%   | 50.0%   |         | 81,648    | 104,267   | 47,232  |       |      | 1,820-54,145    | 6,471-150,196  | 1,820-40,986    |      |       |      |
| HIV                       | 460,547,457   | 290,848,557   | 79,652,343  | 3.65    | 760   | 448     | 286     | 1.57    | 625,073   | 649,216   | 278,505 | 2.33  | 0.01 | 147,404         | 163,462        | 114,272         | 1.43 | 3.87  | 0.05 |
|                           | #VALUE!       | 78.5%         | 21.5%       |         | 19.2% | 61.0%   | 39.0%   |         | 2,276,762 | 1,550,920 | 545,657 |       |      | 37,195-395,644  | 39,153-511,800 | 29,880-305,339  |      |       |      |
| HPV                       | 57,795,110    | 42,592,795    | 9,393,693   | 4.53    | 150   | 88      | 56      | 1.57    | 355,514   | 484,009   | 167,745 | 2.89  | 0.30 | 92,143          | 103,966        | 82,325          | 1.26 | 0.47  | 0.49 |
|                           | #VALUE!       | 81.9%         | 18.1%       |         | 3.8%  | 61.1%   | 38.9%   |         | 849,406   | 1,042,481 | 360,400 |       |      | 30,079-220,559  | 29,742-264,540 | 32,566- 171,377 |      |       |      |
| HSV                       | 22,063,300    | 15,472,470    | 6,536,189   | 2.37    | 48    | 28      | 19      | 1.47    | 459,652   | 552,588   | 344,010 | 1.61  | 0.19 | 202,564         | 119,295        | 309,610         | 0.39 | 4.85  | 0.03 |
|                           | #VALUE!       | 70.3%         | 29.7%       |         | 1.2%  | 59.6%   | 40.4%   |         | 720,790   | 908,183   | 287,596 |       |      | 52,597-421,960  | 40,009-446,395 | 147,885-439,305 |      |       |      |
| Syphilis                  | 1,061,560     | 286,117       | 775,444     | 0.37    | 5     | 2       | 3       | 0.67    | 212,312   | 143,058   | 258,481 | 0.55  | 0.56 | 207,346         | 143,058        | 207,346         | 0.69 | 0.14  | 0.71 |
|                           | #VALUE!       | 27.0%         | 73.0%       |         | 0.1%  | 40.0%   | 60.0%   |         | 152,848   | 122,822   | 176,603 |       |      | 113,088-229,907 | 56,210-229,907 | 113,088-455,010 |      |       |      |
| Other infections          |               |               |             |         |       |         |         |         |           |           |         |       |      |                 |                |                 |      |       |      |
| Aspergillus               | 4,853,858     | 4,482,101     | 371,757     | 12.06   | 26    | 24      | 2       | 12.00   | 186,687   | 186,754   | 185,879 | 1.00  | 1.00 | 47,948          | 47,948         | 185,879         | 0.26 | 0.00  | 1.00 |
|                           | #VALUE!       | 92.3%         | 7.7%        |         | 0.7%  | 92.3%   | 7.7%    |         | 420,903   | 435,756   | 248,298 |       |      | 19,703-157,829  | 20,890-135,113 | 10,306-361,451  |      |       |      |
| Candida                   | 1,219,072     | 1,194,064     | 25,008      | 47.75   | 8     | 6       | 2       | 3.00    | 152,384   | 199,011   | 12,504  | 15.92 | 0.18 | 28,518          | 72,375         | 12,504          | 5.79 | 2.67  | 0.10 |
|                           | #VALUE!       | 97.9%         | 2.1%        |         | 0.2%  | 75.0%   | 25.0%   |         | 262,390   | 293,075   | 17,226  |       |      | 10,508-188,568  | 17,076-264,740 | 324-24,684      |      |       |      |
| Pseudomonas               | 6,473,237     | 6,096,633     | 376,604     | 16.19   | 43    | 39      | 4       | 9.75    | 150,540   | 156,324   | 94,151  | 1.66  | 0.90 | 81,793          | 81,793         | 79,244          | 1.03 | 0.00  | 0.96 |
|                           | #VALUE!       | 94.2%         | 5.8%        |         | 1.1%  | 90.7%   | 9.3%    |         | 175,911   | 182,442   | 83,286  |       |      | 11,204-253,337  | 11,108-253,459 | 27,396-160,906  |      |       |      |
| ZV                        | 4,186,583     | 1,472,968     | 2,713,615   | 0.54    | 20    | 9       | 11      | 0.82    | 209,329   | 163,663   | 246,692 | 0.66  | 0.21 | 145,505         | 47,343         | 161,033         | 0.29 | 0.20  | 0.65 |
|                           | #VALUE!       | 35.2%         | 64.8%       |         | 0.5%  | 45.0%   | 55.0%   |         | 261,063   | 250,869   | 275,194 |       |      | 46,117-227,502  | 26,213-147,593 | 105,632-233,537 |      |       |      |
| total specific infections | #VALUE!       | #VALUE!       | #VALUE!     | #VALUE! | 3,953 | #VALUE! | #VALUE! | #VALUE! |           |           |         |       |      | 158,055         |                |                 |      |       |      |
| Overall                   | 2,599,985,851 | 1,785,979,172 | 488,178,602 | 3.66    | 6,170 | 4,357   | 1,695   | 2.57    | 421,733   | 409,910   | 288,011 | 1.42  | 0.01 | 49,490-352,699  | 179,389        | 125,556         | 1.43 | 74.40 | 0.01 |
|                           |               | 78.53%        | 21.47%      |         |       | 71.99%  | 28.01%  |         | 1,315,935 | 840,087   | 704,474 |       |      |                 |                |                 |      |       |      |



| Year          | Investment<br>(male); £ | Change from<br>previous year<br>(male); £ | Fold<br>difference<br>(male) | P    | Change<br>over 1997<br>(male); £ | Fold<br>differen<br>ce<br>(male) | P    | Investment<br>(female); £ | Change from<br>previous year<br>(female); £ | Fold<br>differenc<br>e<br>(female) | P    | Change<br>over 1997<br>(female); £ | Fold<br>differen<br>ce<br>(female) | P    | Investme<br>nt (male);<br>% | Investmen<br>t (female);<br>% | Absolute<br>difference<br>(gender) | Fold<br>differenc<br>e<br>(gender) |
|---------------|-------------------------|-------------------------------------------|------------------------------|------|----------------------------------|----------------------------------|------|---------------------------|---------------------------------------------|------------------------------------|------|------------------------------------|------------------------------------|------|-----------------------------|-------------------------------|------------------------------------|------------------------------------|
| 1997          | 64,158,003              |                                           |                              |      |                                  |                                  |      | 16,305,109                |                                             |                                    |      |                                    |                                    |      | 79.7%                       | 20.3%                         | 47,852,894                         | 3.93                               |
| 1998          | 78,287,824              | 14,129,821                                | 1.22                         | 0.57 | 14,129,821                       | 1.22                             | 0.57 | 13,110,597                | -3,194,512                                  | 0.80                               | 0.90 | -3,194,512                         | 0.80                               | 0.90 | 85.7%                       | 14.3%                         | 65,177,227                         | 5.97                               |
| 1999          | 79,477,324              | 1,189,500                                 | 1.02                         | 0.37 | 15,319,321                       | 1.24                             | 0.14 | 24,366,507                | 11,255,911                                  | 1.86                               | 0.79 | 8,061,398                          | 1.49                               | 0.88 | 76.5%                       | 23.5%                         | 55,110,816                         | 3.26                               |
| 2000          | 245,740,477             | 166,263,153                               | 3.09                         | 0.00 | 181,582,474                      | 3.83                             | 0.01 | 55,636,657                | 31,270,150                                  | 2.28                               | 0.01 | 39,331,548                         | 3.41                               | 0.01 | 81.5%                       | 18.5%                         | 190,103,820                        | 4.42                               |
| 2001          | 105,423,252             | -140,317,225                              | 0.43                         | 0.09 | 41,265,248                       | 1.64                             | 0.01 | 34,133,067                | -21,503,591                                 | 0.61                               | 0.23 | 17,827,958                         | 2.09                               | 0.01 | 75.5%                       | 24.5%                         | 71,290,185                         | 3.09                               |
| 2002          | 166,695,481             | 61,272,230                                | 1.58                         | 0.89 | 102,537,478                      | 2.60                             | 0.01 | 59,568,874                | 25,435,807                                  | 1.75                               | 0.41 | 43,263,765                         | 3.65                               | 0.01 | 73.7%                       | 26.3%                         | 107,126,607                        | 2.80                               |
| 2003          | 114,827,602             | -51,867,880                               | 0.69                         | 0.03 | 50,669,599                       | 1.79                             | 0.50 | 27,241,313                | -32,327,560                                 | 0.46                               | 0.14 | 10,936,204                         | 1.67                               | 0.05 | 80.8%                       | 19.2%                         | 87,586,288                         | 4.22                               |
| 2004          | 93,129,587              | -21,698,015                               | 0.81                         | 0.09 | 28,971,584                       | 1.45                             | 0.30 | 26,908,997                | -332,316                                    | 0.99                               | 0.91 | 10,603,888                         | 1.65                               | 0.04 | 77.6%                       | 22.4%                         | 66,220,590                         | 3.46                               |
| 2005          | 177,791,995             | 84,662,408                                | 1.91                         | 0.03 | 113,633,992                      | 2.77                             | 0.26 | 39,460,786                | 12,551,789                                  | 1.47                               | 0.60 | 23,155,677                         | 2.42                               | 0.01 | 81.8%                       | 18.2%                         | 138,331,209                        | 4.51                               |
| 2006          | 126,329,085             | -51,462,910                               | 0.71                         | 0.60 | 62,171,082                       | 1.97                             | 0.54 | 37,473,263                | -1,987,522                                  | 0.95                               | 0.35 | 21,168,154                         | 2.30                               | 0.03 | 77.1%                       | 22.9%                         | 88,855,822                         | 3.37                               |
| 2007          | 126,144,324             | -184,761                                  | 1.00                         | 0.03 | 61,986,320                       | 1.97                             | 0.12 | 28,293,204                | -9,180,059                                  | 0.76                               | 0.01 | 11,988,095                         | 1.74                               | 0.48 | 81.7%                       | 18.3%                         | 97,851,119                         | 4.46                               |
| 2008          | 173,132,770             | 46,988,446                                | 1.37                         | 0.07 | 108,974,767                      | 2.70                             | 0.01 | 44,307,821                | 16,014,617                                  | 1.57                               | 0.70 | 28,002,712                         | 2.72                               | 0.73 | 79.6%                       | 20.4%                         | 128,824,949                        | 3.91                               |
| 2009          | 114,490,290             | -58,642,480                               | 0.66                         | 0.12 | 50,332,287                       | 1.78                             | 0.01 | 41,820,953                | -2,486,868                                  | 0.94                               | 0.03 | 25,515,844                         | 2.56                               | 0.01 | 73.2%                       | 26.8%                         | 72,669,337                         | 2.74                               |
| 2010          | 120,351,159             | 5,860,868                                 | 1.05                         | 0.33 | 56,193,155                       | 1.88                             | 0.01 | 39,551,453                | -2,269,500                                  | 0.95                               | 0.56 | 23,246,344                         | 2.43                               | 0.06 | 75.3%                       | 24.7%                         | 80,799,705                         | 3.04                               |
| Mean          | 127,569,941             | 4,322,550                                 |                              |      | 68,289,779                       |                                  |      | 34,869,900                | 1,788,180                                   | #####                              |      |                                    |                                    |      | 78.6%                       | 21.4%                         | 92,700,041                         |                                    |
| SD            | 48,770,855              | 76,214,220                                |                              |      | 47,073,847                       |                                  |      | 13,365,475                | 17,657,139                                  | #####                              |      |                                    |                                    |      |                             |                               | 38,264,674                         |                                    |
| Total Gender  | 1,785,979,172           |                                           |                              |      |                                  |                                  |      | 488,178,602               |                                             |                                    |      |                                    |                                    |      |                             |                               | 1,297,800,569                      | 3.66                               |
| Total Overall | 2,599,985,851           |                                           |                              |      |                                  |                                  |      |                           |                                             |                                    |      |                                    |                                    |      |                             |                               |                                    |                                    |
