# Supplementary material for: Differences in research funding for women scientists: a systematic comparison of UK investments in global infectious disease research during 1997–2010
Source: HighWire-hosted journal article supplement (doi:10.1136/bmjopen-2013-003362), 2013-12-01
Supplement: bmjopen-2013-003362supp_table2.pdf [file bmjopen-2013-003362supp_table2.pdf]

| Funder                          | Investment (total); £ (%) | Investment (male); £ (%) | Investment (female); £ | Fold differenc | Studies (total); n (%) | Studies (male); £ | Studies (female); n | Fold differenc | Mean grant (total); £ | Mean grant (male); £ | Mean grant (female); £ | Fold differenc | P    | Median grant (total); £ (IQR) | Median grant (male); £ (IQR) | Median grant (female); £ (IQR) | Fold differenc | Chi-square | P    |
|---------------------------------|---------------------------|--------------------------|------------------------|----------------|------------------------|-------------------|---------------------|----------------|-----------------------|----------------------|------------------------|----------------|------|-------------------------------|------------------------------|--------------------------------|----------------|------------|------|
| Public funding                  | 1,393,972,967             | 1,025,211,218            | 279,810,244            | 3.66           | 1,082                  | 1,722             | 624                 | 2.76           | 588,503               | 595,361              | 448,414                | 1.17           | 0.01 | 255,992                       | 272,452                      | 213,718                        | 1.27           | 29.38      | 0.01 |
|                                 | 53.6%                     | 78.6%                    | 21.4%                  |                | 17.6%                  | 73.4%             | 26.6%               |                | 1,447,668             | 1,080,718            | 814,979                |                |      | 127,167-529,610               | 138,322- 572,525             | 92,880-402,917                 |                |            |      |
| BBSRC                           | 186,268,429               | 160,120,540              | 26,147,889             | 6.12           | 578                    | 485               | 93                  | 5.22           | 322,264               | 330,145              | 281,160                | 1.17           | 0.78 | 253,398                       | 253,498                      | 244,972                        | 1.03           | 0.12       | 0.73 |
|                                 | 7.2%                      | 86.0%                    | 14.0%                  |                | 9.4%                   | 83.9%             | 16.1%               |                | 361,565               | 383,963              | 205,593                |                |      | 169,787-365,159               | 176,763-363,830              | 149,828-371,577                |                |            |      |
| DFID                            |                           |                          |                        |                |                        |                   |                     |                |                       |                      |                        |                |      |                               |                              |                                |                |            |      |
| DH                              | 134,961,745               | 101,933,746              | 32,757,325             | 3.11           | 285                    | 194               | 89                  | 2.18           | 473,550               | 525,432              | 368,060                | 1.43           | 0.37 | 203,544                       | 213,107                      | 181,697                        | 1.17           | 0.36       | 0.55 |
|                                 | 5.2%                      | 75.7%                    | 24.3%                  |                | 4.6%                   | 68.6%             | 31.4%               |                | 846,024               | 968,640              | 482,041                |                |      | 72,628-514,066                | 72,627-542,097               | 65,015-383,886                 |                |            |      |
| European Commission             | 255,015,533               | 186,846,015              | 65,558,847             | 2.85           | 219                    | 141               | 71                  | 1.99           | 1,164,454             | 1,325,149            | 923,364                | 1.44           | 0.58 | 439,762                       | 555,497                      | 199,133                        | 2.79           | 3.58       | 0.06 |
|                                 | 9.8%                      | 74.0%                    | 26.0%                  |                | 3.6%                   | 66.5%             | 33.5%               |                | 2,084,358             | 2,409,860            | 1,316,016              |                |      | 127,419-1,454,94              | 123,042-1,504,85             | 134,621-1,449,403              |                |            |      |
| MRC                             | 672,895,698               | 537,260,180              | 131,751,245            | 4.08           | 962                    | 715               | 242                 | 2.95           | 699,476               | 751,413              | 544,427                | 1.38           | 0.01 | 366,479                       | 404,615                      | 286,679                        | 1.41           | 18.44      | 0.01 |
|                                 | 25.9%                     | 80.3%                    | 19.7%                  |                | 15.6%                  | 74.7%             | 25.3%               |                | 993,012               | 1,020,748            | 884,442                |                |      | 199,287-713,178               | 210,068-811,860              | 178,182-468,998                |                |            |      |
| UK government, non-DH           | 144,831,562               | 39,050,737               | 23,594,939             | 1.66           | 237                    | 187               | 129                 | 1.45           | 452,898               | 208,828              | 182,907                | 1.14           | 0.01 | 110,178                       | 129,660                      | 59,976                         | 2.16           | 3.79       | 0.05 |
|                                 | 5.6%                      | 62.3%                    | 37.7%                  |                | 3.8%                   | 59.2%             | 40.8%               |                | 2,811,384             | 492,519              | 619,889                |                |      | 19,073-206,784                | 23,761- 207,320              | 12,564-157,053                 |                |            |      |
| Philanthropy                    | 1,108,966,983             | 691,680,388              | 185,866,898            | 3.72           | 2,879                  | 2,044             | 768                 | 2.66           | 383,601               | 338,396              | 242,014                | 1.40           | 0.01 | 146,060                       | 153,653                      | 114,173                        | 1.35           | 23.28      | 0.01 |
|                                 | 42.7%                     | 78.8%                    | 21.2%                  |                | 46.7%                  | 72.7%             | 27.3%               |                | 1,377,079             | 659,025              | 711,420                |                |      | 52,433-286,518                | 58,589-302,774               | 42,658-222,842                 |                |            |      |
| Bill & Melinda Gates Foundation | 220,923,242               |                          |                        |                | 39                     |                   |                     |                | 5,664,699             |                      |                        |                |      | 1,488,432                     |                              |                                |                |            |      |
|                                 | 8.5%                      |                          |                        |                | 0.6%                   |                   |                     |                | 8,966,093             |                      |                        |                |      | 628,545-5,576,863             |                              |                                |                |            |      |
| Charity                         | 199,703,382               | 130,726,509              | 58,989,705             | 2.22           | 855                    | 619               | 217                 | 2.85           | 227,332               | 211,190              | 271,842                | 0.78           | 0.01 | 87,318                        | 91,991                       | 76,058                         | 1.21           | 5.23       | 0.02 |
|                                 | 7.7%                      | 68.9%                    | 31.1%                  |                | 13.9%                  | 74.0%             | 26.0%               |                | 730,057               | 454,108              | 1,208,852              |                |      | 27,616-167,829                | 36,429-172,497               | 17,279-150,727                 |                |            |      |
| Wellcome Trust                  | 688,340,359               | 560,953,880              | 126,592,102            | 4.43           | 1,985                  | 1,425             | 550                 | 2.59           | 346,818               | 393,652              | 230,168                | 1.71           | 0.01 | 168,434                       | 191,461                      | 137,241                        | 1.40           | 39.83      | 0.01 |
|                                 | 26.5%                     | 81.6%                    | 18.4%                  |                | 32.2%                  | 72.2%             | 27.8%               |                | 646,625               | 723,549              | 362,836                |                |      | 66,419-335,557                | 74,759-362,424               | 54,019-250,723                 |                |            |      |
| Other funding                   | 103,542,992               | 69,087,566               | 22,501,460             | 3.07           | 1,010                  | 591               | 303                 | 1.95           | 103,683               | 116,899              | 74,262                 | 1.57           | 0.01 | 28,626                        | 32,557                       | 20,373                         | 1.60           | 4.80       | 0.03 |
|                                 | 4.0%                      | 75.4%                    | 24.6%                  |                | 16.4%                  | 66.1%             | 33.9%               |                | 273,102               | 309,358              | 154,373                |                |      | 6,282-105,082                 | 7,225-113,479                | 4,408-79,809                   |                |            |      |
| Overall                         | 2,599,985,851             | 1,785,979,172            | 488,178,602            | 3.66           | 6,165                  | 4,357             | 1,695               | 2.57           | 421,733               | 409,910              | 288,011                | 1.42           | 0.01 | 158,055                       | 179,389                      | 125,556                        | 1.43           | 74.40      | 0.01 |
|                                 |                           | 78.5%                    | 21.5%                  |                |                        | 72.0%             | 28.0%               |                | 1,315,935             | 840,087              | 704,474                |                |      | 49,490-352,699                | 59,146-371,977               | 30,983-261,835                 |                |            |      |
